# Supplementary material for: Iodine-catalyzed electrophilic substitution of indoles: Synthesis of (un)symmetrical diindolylmethanes with a quaternary carbon center
Source: publisher site journal article supplement (doi:10.3762/bjoc.17.102), 2021-06-18
Supplement: Additional file 1 [file 1860-5397-17-102-S1.pdf]

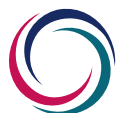

## Supporting Information

for

### **Iodine-catalyzed electrophilic substitution of indoles: Synthesis of (un)symmetrical diindolylmethanes with a quaternary carbon center**

Thanigaimalai Pillaiyar, Masoud Sedaghati, Andhika B. Mahardhika, Lukas L. Wendt  
and Christa E. Müller

*Beilstein J. Org. Chem.* **2021**, *17*, 1464–1475. doi:10.3762/bjoc.17.102

## Experimental and analytical data

| Entry No: | Table of Contents                                                                                                                                                                   | Page        |
|-----------|-------------------------------------------------------------------------------------------------------------------------------------------------------------------------------------|-------------|
| 1         | Radioligand binding assays at CB <sub>1</sub> and CB <sub>2</sub> receptors                                                                                                         | S3          |
| 2         | Functional assays at CB <sub>1</sub> and CB <sub>2</sub> receptors                                                                                                                  | S3-S4       |
| 3         | <b>Figure S1.</b> Affinities of <b>3e</b> and <b>3ad</b> at cannabinoid CB <sub>1</sub> and CB <sub>2</sub> receptors                                                               | S5          |
| 4         | <b>Figure S2.</b> Functional effects of <b>3e</b> and <b>3ad</b> at human CB <sub>1</sub> and CB <sub>2</sub> receptors                                                             | S5          |
| 5         | <b>Figure S3.</b> Antagonistic effects of <b>3e</b> and <b>3ad</b> at human cannabinoid receptors                                                                                   | S36         |
| 6         | Experimental section (general information)<br>General experimental procedures for the synthesis of trifluoromethylated unsymmetrical 3,3'- bis(indolyl)methanes and Analytical Data | S7<br>S8-27 |
| 7         | <b>Figure S4-S36.</b> <sup>1</sup> H and <sup>13</sup> C-NMR spectra of compounds                                                                                                   | S28-S60     |
| 8         | References                                                                                                                                                                          | S61         |

### **Radioligand binding assays at CB<sub>1</sub> and CB<sub>2</sub> receptors**

Competition binding assays were performed using the CB receptor agonist radioligand [<sup>3</sup>H](–)-*cis*-3-[2-hydroxy-4-(1,1-dimethylheptyl)phenyl]-*trans*-4-(3-hydroxypropyl)-cyclohexanol as previously described [S1]. Briefly, membrane preparations of Chinese hamster ovary (CHO) cells stably expressing human CB<sub>1</sub> or CB<sub>2</sub> receptor were used (30 µg of protein/well for CB<sub>1</sub> and 16 µg of protein/well for CB<sub>2</sub>-receptor preparations). All stock solutions of test compounds (10 µM) were prepared in DMSO. After 2 h of incubation, a mixture containing 15 µL of the test compound (in DMSO), 60 µL of [<sup>3</sup>H]CP55,940 solution in assay buffer (50 mM TRIS, 3 mM MgCl<sub>2</sub>, 0.1% BSA, pH 7.4), 60 µL of membrane preparation (in 50 mM TRIS buffer) and 465 µL of assay buffer, were filtered through GF/C glass fiber filters (presoaked for 0.5 h in 0.3% aq. polyethyleneimine solution), using a Brandel 96-channel cell harvester (Brandel, Gaithersburg, MD). Radioactivity on the filters was then measured in a liquid scintillation counter (Topcount NXT, Packard/Perkin-Elmer) after 10 h of preincubation with 50 µl of scintillation cocktail (Multiscint 25, Perkin-Elmer). For the calculation of *K<sub>i</sub>* values the Cheng-Prusoff equation and *K<sub>D</sub>* values of 2.4 nM ([<sup>3</sup>H]CP55,940 at CB<sub>1</sub>) and 0.7 nM ([<sup>3</sup>H]CP55,940 at CB<sub>2</sub>) were used.

### **Functional assays at CB<sub>1</sub> and CB<sub>2</sub> receptors**

Functional assays of the selected compounds were assessed using the Trupath BRET<sup>2</sup> assay system as recently described [S2]. The Trupath plasmids were a gift from Bryan Roth's Laboratory (Addgene kit #1000000163). Briefly, HEK293 cells were seeded in a 6 well-plate at a density of 700,000 cells/well and incubated for 4h. Plasmids containing Gα<sub>i</sub>1-Rluc8, β3 and γ9-GFP2 and either human CB<sub>1</sub> or CB<sub>2</sub> in pcDNA3.1(+) at a ratio of 1:1:1:1 were mixed with Lipofectamine 2000 and transfected according to the manufacturer's protocol. The cells were further incubated overnight, then harvested and seeded at a density of 40,000 cells/well in 96 well-plates with full growth medium, and cultured for another 24h. On the day of the assay,

culture medium was carefully discarded and replaced by 60  $\mu$ L of HBSS-HEPES buffer, followed by the addition of 10  $\mu$ L of 50  $\mu$ M Coelenterazine 400a. For testing of agonistic activity, the test compounds were added to the wells in a volume of 30  $\mu$ L and incubated for 5 min. For antagonist testing, compounds were added in a volume of 15  $\mu$ L, incubated for 5 min, and 15  $\mu$ L of the CB receptor agonist CP,55940 at its EC<sub>80</sub> was added, and the mixture was incubated for another 5 min. Test compounds were dissolved in DMSO and the final DMSO concentration in the assays was 1%. Finally, the signal was measured using a Mitras LB400 according to previously published literature[S3]. Data were obtained from 3-4 independent experiments performed in duplicate.



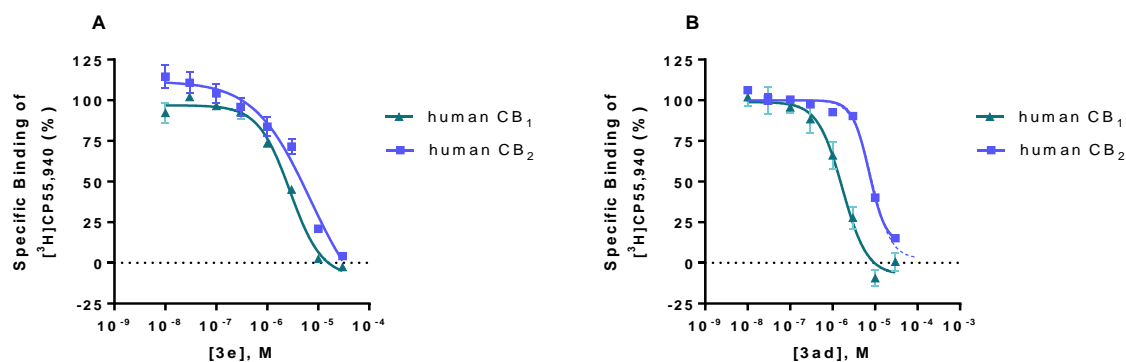

**Figure S1.** Affinities of **3e** (A) and **3ad** (B) for human cannabinoid CB<sub>1</sub> and CB<sub>2</sub> receptors determined in radioligand binding studies. Data points represent means  $\pm$  SEM of at least three independent experiments.

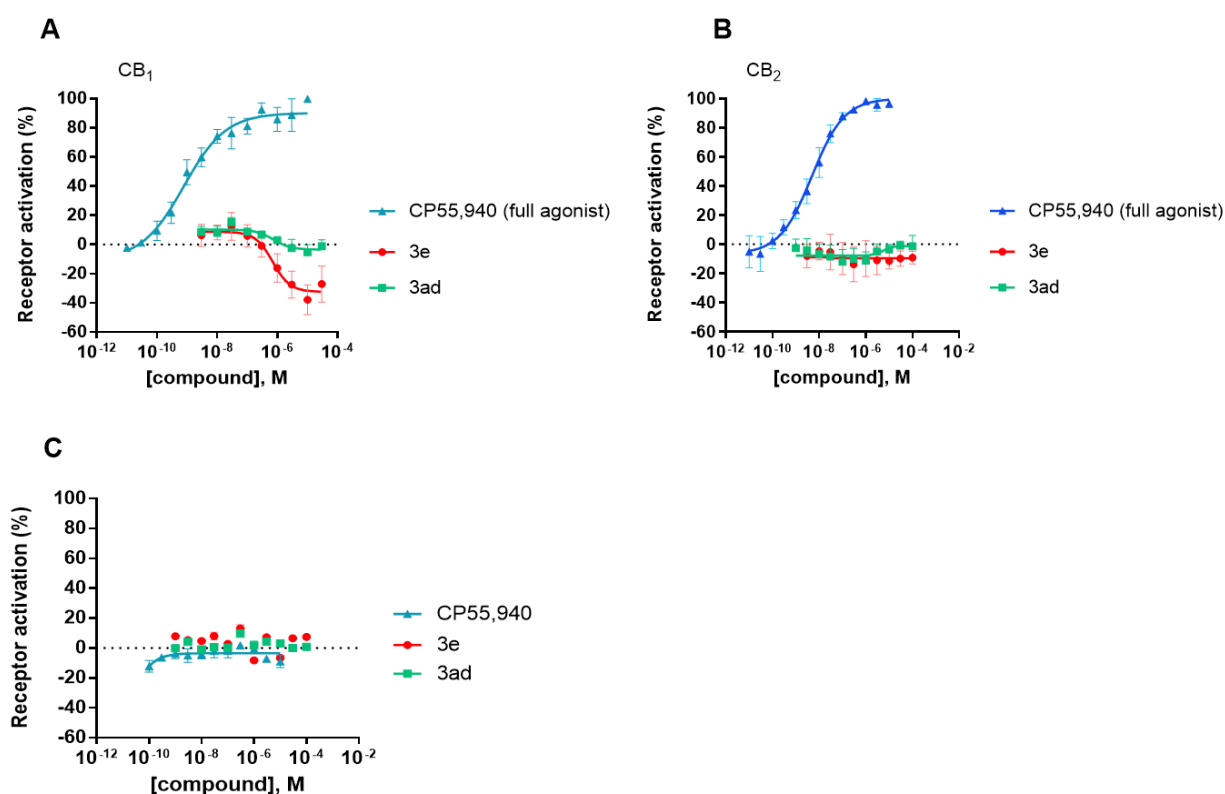

**Figure S2.** Functional effects of compounds **3e** and **3ad** at human CB<sub>1</sub> (A) and CB<sub>2</sub> (B) receptors, and control HEK293 cells transfected with only Gα<sub>i</sub>1-Rluc8, β<sub>3</sub> and γ<sub>9</sub>-GFP2 (C), determined using the Trupath BRET<sup>2</sup> assay. The effect of the full agonist CP55,940 was set

as 100% receptor activation ( $EC_{50}$  at  $CB_1 = 0.00105 \pm 0.00050 \mu M$ ;  $EC_{50}$  at  $CB_2 = 0.0100 \pm 0.0005 \mu M$ ). Compounds **3e** and **3ad** showed no agonistic activity, but inverse agonistic activity at the  $CB_1$ , not at the  $CB_2$  receptor. Data points represent means  $\pm$  SEM of minimum three independent experiments.

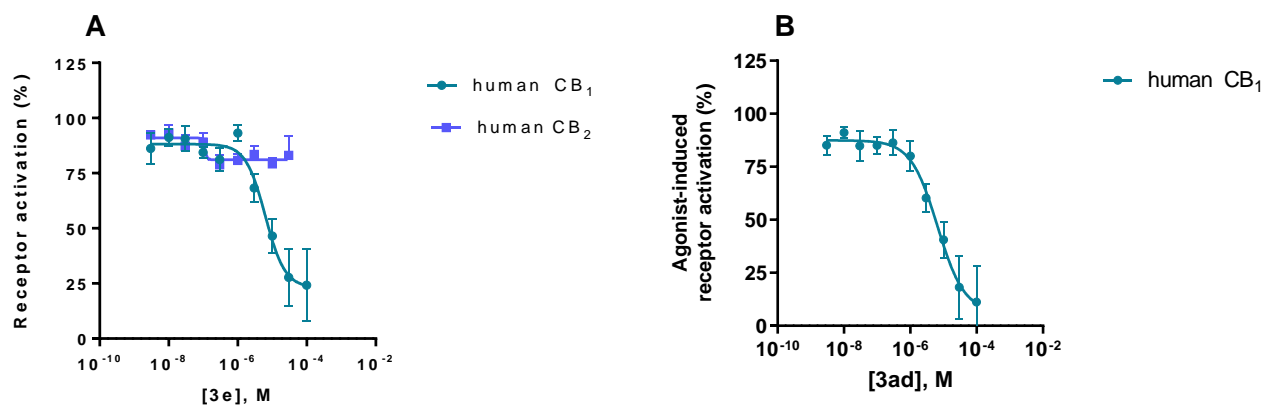

**Figure S3.** Determination of antagonistic activity of **3e** at human  $CB_1$  and  $CB_2$  (A) and of **3ad** at human  $CB_1$  receptors (B), determined using the Trupath BRET<sup>2</sup> assay. Receptor stimulation was achieved using CP55,940 at a concentration representing its  $EC_{80}$  value at the respective receptor. Data points represent means  $\pm$  SEM of at least three independent experiments.

## Experimental Section

### General information

Chemicals were purchased from Merck (Darmstadt, Germany), ABCR (Karlsruhe, Germany), or TCI (Eschborn, Germany). Thin layer chromatography (TLC) was performed on TLC plates F<sub>254</sub> (Merck) and analyzed using UV light. An LCMS instrument coupled to electrospray ionisation mass spectrometry (LC ESI-MS) was used to determine the purities of the isolated products using the following procedure: the compounds were dissolved at a concentration of 1.0 mg/mL in acetonitrile, containing 2 mM NH<sub>4</sub>CH<sub>3</sub>COO. Then, 10 µL of the sample was injected into an HPLC column (Phenomenex Luna 3 µ C18, 50 × 2.00 mm). Elution was performed with a gradient of water: methanol (containing 2 mM NH<sub>4</sub>CH<sub>3</sub>COO) from 90:10 to 0:100 starting the gradient immediately at a flow rate of 250 µL/min for 15 min followed by washing with 100% methanol for another 15 min. UV absorption was detected from 200 to 600 nm using a diode array detector (DAD). The purity of the compounds was determined at 220–400 nm and was ≥95% for all products. <sup>1</sup>H, <sup>13</sup>C and <sup>19</sup>F NMR data were measured in CDCl<sub>3</sub> or DMSO-d<sub>6</sub> as a solvent. Chemical shifts are reported in parts per million (ppm) relative to the deuterated solvents (DMSO-d<sub>6</sub>), <sup>1</sup>H: 2.49 ppm, <sup>13</sup>C: 39.70 ppm; (CDCl<sub>3</sub>) <sup>1</sup>H: 7.25 ppm, <sup>13</sup>C: 77.17 ppm; coupling constants J are given in Hertz and spin multiplicities are given as s (singlet), d (doublet), t (triplet), q (quartet), sext (sextet), m (multiplet), br (broad). HRMS was recorded on a micrOTOF-Q mass spectrometer (Bruker) with ESI-source coupled with an HPLC Dionex Ultimate 3000 (Thermo Scientific) using an EC 50/2 Nucleodur C18 Gravity 3 µm column (MachereyNagel). The column temperature was 425 °C. Ca. 1 µL of a 1 mg/mL solution of the sample in acetonitrile was injected and a flow rate of 0.3 mL/min was used. HPLC was started with a solution of acetonitrile in water (10:90), containing 2 mM CH<sub>3</sub>COONH<sub>4</sub>. The gradient was started after 1 min reaching 100% acetonitrile within 9 min

and then flushed with this concentration for another 5 min. Melting points were measured on a melting point apparatus (BÜCHI melting point B-545) and are uncorrected.

**General Experimental Procedure for the Synthesis of diindolymethanes 3:** To the solution of **1** [S4] (0.2 mmol) and appropriate indole derivatives (**2**, 0.2 mmol) in acetonitrile (5 mL), I<sub>2</sub> (0.1 eq., 10%) was added at rt. The mixture was heated to 40 °C. The reaction was monitored by TLC with UV detection. After the reaction was completed, the mixture was poured onto ice water, and extracted with EtOAc (2 x 25 mL). The combined organic layers were washed with brine, dried with MgSO<sub>4</sub>, filtered, and concentrated under reduced pressure. The crude product was purified by silica gel column chromatography.

**5-Methoxy-3-(2,2,2-trifluoro-1-(4-methoxy-1*H*-indol-3-yl)-1-phenylethyl)-1*H*-indole (3b):**

The compound **3b** was synthesized by the reaction of 2,2,2-trifluoro-1-(5-methoxy-1*H*-indol-3-yl)-1-phenylethan-1-ol (**1a**, 64 mg) and 4-methoxy-1*H*-indole (**1h**, 30 mg, 0.2 mmol) in acetonitrile (5 mL) in the presence of iodine (5 mg, 10 mol%). The product was isolated as brown solid (60 mg, 67%). M.p: 110.5 °C. <sup>1</sup>H NMR (600 MHz, DMSO-*d*<sub>6</sub>) δ [ppm] = 11.22 (s, 1H, NH), 10.89 (s, 1H, NH), 7.43 – 7.30 (m, 6H), 7.07 (d, <sup>4</sup>J<sub>H,H</sub>, 1H), 7.02 – 6.99 (m, 1H), 6.70 (dd, <sup>3</sup>J<sub>H,H</sub> = 8.8 Hz, <sup>4</sup>J<sub>H,H</sub> = 2.4 Hz, 1H), 6.49 – 6.46 (m, 1H), 6.08 (d, <sup>4</sup>J<sub>H,H</sub> = 2.4 Hz, 1H), 5.88 (d, <sup>4</sup>J<sub>H,H</sub> = 2.4 Hz, 1H), 3.83 – 3.76 (m, 1H), 3.79 (s, 3H, CH<sub>3</sub>), 3.25 (s, 3H, CH<sub>3</sub>). <sup>13</sup>C NMR (151 MHz, DMSO-*d*<sub>6</sub>) δ [ppm] = 152.8, 152.5, 138.1, 138.1, 134.4, 131.6, 128.8 (2C, CH), 128.39 (q, <sup>1</sup>J<sub>C,F</sub> = 266.2 Hz, 1C, CF<sub>3</sub>), 128.2, 128.0, 126.6, 126.3, 122.4, 117.0, 112.3, 111.1, 111.0, 105.2, 102.4, 101.2, 99.0, 55.73 (q, <sup>2</sup>J<sub>C,F</sub> = 25.4, 1C, C<sub>q</sub>), 54.8 (1C, CH<sub>3</sub>), 54.7 (1C, CH<sub>3</sub>). <sup>19</sup>F NMR (565 MHz, DMSO-*d*<sub>6</sub>) δ [ppm] = -63.29 (s, 3F, CF<sub>3</sub>). LC-MS: positive [*m/z*] = 451.3 [M+H]<sup>+</sup>. Purity by HPLC-UV (254 nm) ESI-MS: 96.0%. HRMS (ESI-QTOF) calculated for C<sub>26</sub>H<sub>21</sub>F<sub>3</sub>N<sub>2</sub>O<sub>2</sub> [M + H]<sup>+</sup>: 451.1633 found: 451.1630.

### **3-(2,2,2-Trifluoro-1-(5-methoxy-1*H*-indol-3-yl)-1-phenylethyl)-1*H*-indole-4-carbonitrile**

**(3c):** The compound **3c** was synthesized by the reaction of 2,2,2-trifluoro-1-(5-methoxy-1*H*-indol-3-yl)-1-phenylethan-1-ol (**1a**, 64 mg, 0.2 mmol) and 4-cyanoindole (**2c**, 28 mg, 0.2 mmol) in acetonitrile (5 mL) in the presence of iodine (5 mg, 10 mol%). The product was isolated as white solid (58 mg, 65%). M.p: 201-203 °C. <sup>1</sup>H NMR (600 MHz, DMSO-*d*<sub>6</sub>) δ [ppm] = 11.91 (s, 1H, NH), 11.13 (s, 1H, NH), 7.81 (dd, <sup>3</sup>*J*<sub>H,H</sub> = 8.1 Hz, <sup>4</sup>*J*<sub>H,H</sub> = 1.1 Hz, 1H), 7.60 – 7.54 (m, 2H), 7.48 (s, 1H), 7.39 – 7.31 (m, 3H), 7.28 – 7.15 (m, 4H), 6.63 (dd, <sup>3</sup>*J*<sub>H,H</sub> = 8.7 Hz, <sup>4</sup>*J*<sub>H,H</sub> = 2.4 Hz, 1H), 6.17 (s, 1H), 3.36 (s, 3H, CH<sub>3</sub>). <sup>13</sup>C NMR (151 MHz, DMSO-*d*<sub>6</sub>) δ [ppm] = 152.5, 138.6, 137.5, 131.8, 129.7, 129.60 (q, <sup>1</sup>*J*<sub>C,F</sub> = 282.9, 1C, CF<sub>3</sub>), 129.5, 128.5, 128.3, 128.0 (2C, CH), 127.7, 126.5, 124.5, 121.0, 118.7, 117.3, 112.6, 112.1, 110.9, 110.6, 103.4, 102.9, 55.05 (q, <sup>2</sup>*J*<sub>C,F</sub> = 25.8 Hz, 1C, C<sub>q</sub>), 54.8 (1C, CH<sub>3</sub>). <sup>19</sup>F NMR (565 MHz, DMSO-*d*<sub>6</sub>) δ [ppm] = -63.36 (s, 3F, CF<sub>3</sub>). LC-MS: positive [*m/z*] = 446.0 ([M+H]<sup>+</sup>). Purity by HPLC-UV (254 nm) ESI-MS: 99.0%. HRMS (ESI-QTOF) calculated for C<sub>26</sub>H<sub>18</sub>F<sub>3</sub>N<sub>3</sub>O [M + H]<sup>+</sup>: 446.1480 found: 446.1467.

### **6-Fluoro-3-(2,2,2-trifluoro-1-(5-methoxy-1*H*-indol-3-yl)-1-phenylethyl)-1*H*-indole (3e):**

The compound **3e** was synthesized by the reaction of 2,2,2-trifluoro-1-(5-methoxy-1*H*-indol-3-yl)-1-phenylethan-1-ol (**1a**, 64 mg, 0.2 mmol) and 6-fluoro-1*H*-indole (**2e**, 27 mg, 0.22 mmol) in acetonitrile (5 mL) in the presence of iodine (5 mg, 10 mol%). The product was isolated as light brown solid (84 mg, 96%). M.p: 102-104 °C. <sup>1</sup>H NMR (600 MHz, DMSO-*d*<sub>6</sub>) δ [ppm] = 11.24 (d, <sup>2</sup>*J*<sub>H,H</sub> = 2.8 Hz, 1H, NH), 11.07 (d, <sup>2</sup>*J*<sub>H,H</sub> = 2.8 Hz, 1H, NH), 7.46 – 7.38 (m, 2H), 7.36 (m, 3H), 7.29 (d, <sup>3</sup>*J*<sub>H,H</sub> = 8.8 Hz, 1H), 7.18 (dd, <sup>3</sup>*J*<sub>H,H</sub> = 9.9 Hz, <sup>4</sup>*J*<sub>H,H</sub> = 2.4 Hz, 1H), 6.94 (d, <sup>4</sup>*J*<sub>H,H</sub> = 2.6 Hz, 2H), 6.83 (dd, <sup>2</sup>*J*<sub>H,H</sub> = 9.0 Hz, <sup>2</sup>*J*<sub>H,H</sub> = 5.5 Hz, 1H), 6.72 – 6.60 (m, 2H), 6.20 – 6.14 (m, 1H), 3.38 (s, 3H, CH<sub>3</sub>). <sup>13</sup>C NMR (151 MHz, DMSO-*d*<sub>6</sub>) δ [ppm] = 158.42 (d, <sup>1</sup>*J*<sub>C,F</sub> = 235.2 Hz, 1C, CF<sub>arom</sub>), 152.6, 138.9, 136.8, 136.7, 129.0, 128.0, 128.02 (q, <sup>1</sup>*J*<sub>C,F</sub> = 287.9, 123.5 Hz, 1C, CF<sub>3</sub>), 127.6, 127.4, 126.7, 126.3, 122.8, 122.00 (d, <sup>2</sup>*J*<sub>C,F</sub> = 13.8 Hz, 1C, CF<sub>arom</sub>), 113.3, 112.3, 112.2, 110.8, 107.4, 107.2, 103.0, 97.6, 97.4, 55.09 (q, <sup>2</sup>*J*<sub>C,F</sub> = 24.2 Hz, 1C, C<sub>q</sub>), 54.8

(1C, CH<sub>3</sub>). <sup>19</sup>F NMR (565 MHz, DMSO-*d*<sub>6</sub>)  $\delta$  [ppm] = -62.49 (s, 3F, CF<sub>3</sub>), -120.78 – -123.43 (m, 1F, F<sub>arom</sub>). LC-MS: positive [*m/z*] = 439.1[M+H]<sup>+</sup>. Purity by HPLC-UV (254 nm) ESI-MS: 99.0% HRMS (ESI-QTOF) calculated for C<sub>25</sub>H<sub>18</sub>F<sub>4</sub>N<sub>2</sub>O [M + H]<sup>+</sup>: 439.1434 found: 439.1422.

**3-(2,2,2-Trifluoro-1-(5-methoxy-1*H*-indol-3-yl)-1-phenylethyl)-1*H*-indol-5-ol (3f):** The compound **3f** was synthesized by the reaction of 2,2,2-trifluoro-1-(5-methoxy-1*H*-indol-3-yl)-1-phenylethan-1-ol (**1a**, 64 mg, 0.2 mmol) and 6-hydroxy-1*H*-indole (**2f**, 27 mg, 0.2 mmol) in acetonitrile (5 mL) in the presence of iodine (5 mg, 10 mol%). The product was isolated (53 mg, 61%) as white solid. M.p: 218-220 °C. <sup>1</sup>H NMR (600 MHz, DMSO-*d*<sub>6</sub>)  $\delta$  [ppm] = 11.19 (d, <sup>4</sup>*J*<sub>H,H</sub> = 2.8 Hz, 1H, NH), 10.45 (d, <sup>4</sup>*J*<sub>H,H</sub> = 2.4 Hz, 1H, NH), 8.89 (s, 1H, OH), 7.39 (dd, <sup>3</sup>*J*<sub>H,H</sub> = 5.5 Hz, <sup>4</sup>*J*<sub>H,H</sub> = 1.9 Hz, 3H), 7.36 – 7.33 (m, 2H), 7.30 (d, <sup>3</sup>*J*<sub>H,H</sub> = 8.8 Hz, 1H), 7.23 (d, <sup>4</sup>*J*<sub>H,H</sub> = 8.5 Hz, 1H), 7.06 (d, <sup>4</sup>*J*<sub>H,H</sub> = 2.6 Hz, 1H), 6.77 (d, <sup>4</sup>*J*<sub>H,H</sub> = 2.1 Hz, 1H), 6.68 (dd, <sup>3</sup>*J*<sub>H,H</sub> = 8.8 Hz, <sup>4</sup>*J*<sub>H,H</sub> 2.4 Hz, 1H), 6.50 (dd, <sup>3</sup>*J*<sub>H,H</sub> = 8.4 Hz, <sup>4</sup>*J*<sub>H,H</sub> = 2.2 Hz, 1H), 5.98 (d, <sup>4</sup>*J*<sub>H,H</sub> = 2.2 Hz, 1H), 5.90 (d, <sup>4</sup>*J*<sub>H,H</sub> = 2.4 Hz, 1H), 3.23 (s, 3H, CH<sub>3</sub>). <sup>13</sup>C NMR (151 MHz, DMSO-*d*<sub>6</sub>)  $\delta$  [ppm] = 153.3, 152.8, 138.3, 138.0, 133.9, 131.6, 128.8 (2C, CH<sub>3</sub>), 128.1 (2C, CH<sub>3</sub>), 127.9, 127.23 (q, <sup>1</sup>*J*<sub>C,F</sub> = 282.8 Hz, 1C, CF<sub>3</sub>), 126.6, 126.4, 120.4, 119.9, 112.2, 111.2, 111.0, 109.8, 103.9, 102.4, 96.8, 55.77 (q, <sup>2</sup>*J*<sub>C,F</sub> = 13.4 Hz, 1C, C<sub>q</sub>), 54.6 (1C, CH<sub>3</sub>). <sup>19</sup>F NMR (565 MHz, DMSO-*d*<sub>6</sub>)  $\delta$  [ppm] = -63.27 (s, 3F, CF<sub>3</sub>). LC-MS: positive [*m/z*] = 437.0 [M+H]<sup>+</sup>. Purity by HPLC-UV (254 nm) ESI-MS: 99.0%. HRMS (ESI-QTOF) calculated for C<sub>25</sub>H<sub>19</sub>F<sub>3</sub>N<sub>2</sub>O<sub>2</sub> [M + H]<sup>+</sup>: 437.1477 found: 437.1478.

**7-Bromo-3-(2,2,2-trifluoro-1-(5-methoxy-1*H*-indol-3-yl)-1-phenylethyl)-1*H*-indole (3g):** The compound **3g** was synthesized by the reaction of 2,2,2-trifluoro-1-(5-methoxy-1*H*-indol-3-yl)-1-phenylethan-1-ol (**1a**, 64 mg, 0.2 mmol) and 7-bromo-1*H*-indole (**2g**, 39 mg, 0.2 mmol) in acetonitrile (5 mL) in the presence of iodine (5 mg, 10 mol%). The product was isolated as brown solid (95 mg, 95%). M.p: 104-106 °C. <sup>1</sup>H NMR (600 MHz, DMSO-*d*<sub>6</sub>)  $\delta$  [ppm] = 11.42

(s, 1H, NH), 11.09 (s, 1H, NH), 7.43 – 7.40 (m, 2H), 7.38 – 7.35 (m, 3H), 7.31 – 7.26 (m, 2H), 6.95 – 6.89 (m, 3H), 6.75 (t,  $^3J_{\text{H,H}} = 7.9$  Hz, 1H), 6.69 (dd,  $^3J_{\text{H,H}} = 8.9$  Hz,  $^4J_{\text{H,H}} = 2.4$  Hz, 1H), 3.39 (s, 3H, CH<sub>3</sub>). <sup>13</sup>C NMR (151 MHz, DMSO)  $\delta$  [ppm] = 152.8, 138.8, 135.2, 132.0, 129.2, 128.3 (2C, CH<sub>arom</sub>), 128.24 (q,  $^1J_{\text{C,F}} = 285.0$  Hz), 128.0, 127.9, 127.8, 127.0, 126.4, 123.9, 120.8, 120.8, 120.4, 114.7, 112.5, 112.4, 111.1, 104.6, 103.1, 55.45 (1C, CH<sub>3</sub>), 55.0 (1C, CH<sub>3</sub>). <sup>19</sup>F NMR (565 MHz, DMSO-*d*<sub>6</sub>)  $\delta$  [ppm] = -62.39 (s, 3F, CF<sub>3</sub>). LC-MS: positive [*m/z*] = 499.3 [M+H]<sup>+</sup>. Purity by HPLC-UV (254 nm) ESI-MS: 95.5%. HRMS (ESI-QTOF) calculated for C<sub>25</sub>H<sub>18</sub>BrF<sub>3</sub>N<sub>2</sub>O [M + H]<sup>+</sup>: 499.0633 found: 499.0630.

### 5,6-Difluoro-3-(2,2,2-trifluoro-1-(5-methoxy-1*H*-indol-3-yl)-1-phenylethyl)-1*H*-indole

**(3h):** The compound **3h** was synthesized by the reaction of 2,2,2-trifluoro-1-(5-methoxy-1*H*-indol-3-yl)-1-phenylethan-1-ol (**1a**, 64 mg, 0.22 mmol) and 5,6-difluoro-1*H*-indole (**2h**, 31 mg, 0.2 mmol) in acetonitrile (5 mL) in the presence of iodine (5 mg, 10 mol%). The product was isolated as yellow solid (83 mg, 91%). M.p: 205-207 °C. <sup>1</sup>H NMR (600 MHz, DMSO-*d*<sub>6</sub>)  $\delta$  [ppm] = 11.38 (s, 1H, NH), 11.10 (s, 1H, NH), 7.44 – 7.35 (m, 6H), 7.29 (d,  $^3J_{\text{H,H}} = 8.8$  Hz, 1H), 7.07 (d,  $^4J_{\text{H,H}} = 2.6$  Hz, 1H), 6.96 (d,  $^4J_{\text{H,H}} = 2.6$  Hz, 1H), 6.68 (dd,  $^3J_{\text{H,H}} = 8.8$ ,  $^4J_{\text{H,H}} = 2.4$  Hz, 1H), 6.53 (m, 1H), 6.12 (d,  $^4J_{\text{H,H}} = 2.4$  Hz, 1H), 3.37 (s, 3H, CH<sub>3</sub>). <sup>13</sup>C NMR (151 MHz, DMSO-*d*<sub>6</sub>)  $\delta$  [ppm] = 152.7, 146.25 (dd,  $^1J_{\text{C,F}} = 238.4$  Hz,  $^2J_{\text{C,F}} = 15.7$  Hz, 1C, CF<sub>arom</sub>), 144.54 (dd,  $^1J_{\text{C,F}} = 233.8$  Hz,  $^2J_{\text{C,F}} = 14.7$  Hz, 1C, CF<sub>arom</sub>), 138.5, 131.9, 131.87 (d,  $^3J_{\text{C,F}} = 10.6$  Hz, 1C, C<sub>q</sub>), 129.0, 128.6, 128.1 (2C, CH), 128.05 (d,  $^1J_{\text{C,F}} = 287.4$  Hz, 1C, CF<sub>3</sub>), 127.8, 126.8, 126.2, 121.41 (d,  $^3J_{\text{C,F}} = 8.2$  Hz, 1C, CH<sub>arom</sub>), 113.3, 112.3, 112.0, 110.9, 107.02 (d,  $^2J_{\text{C,F}} = 19.8$  Hz, 1C, CH<sub>arom</sub>), 102.9, 99.6, 99.5, 54.83 (d,  $^2J_{\text{C,F}} = 26.2$  Hz, 1C, C<sub>q</sub>), 54.8 (1C, CH<sub>3</sub>). <sup>19</sup>F NMR (565 MHz, DMSO-*d*<sub>6</sub>)  $\delta$  [ppm] = -62.73 (s, 3F, CF<sub>3</sub>), -145.02 – -145.50 (m, 1F, F<sub>arom</sub>), -148.00 – -148.43 (m, 1F, F<sub>arom</sub>). LC-MS: positive [*m/z*] = 457.2 [M+H]<sup>+</sup>. Purity by HPLC-UV (254 nm) ESI-MS: 99.0%. HRMS (ESI-QTOF) calculated for C<sub>25</sub>H<sub>17</sub>F<sub>5</sub>N<sub>2</sub>O [M + H]<sup>+</sup>: 457.1339 found: 457.1325.

**4-Methoxy-3-(2,2,2-trifluoro-1-(1*H*-indol-3-yl)-1-phenylethyl)-1*H*-indole (3i):** The compound **3i** was synthesized by the reaction of 2,2,2-trifluoro-1-(4-methoxy-1*H*-indol-3-yl)-1-phenylethan-1-ol (**1b**, 64 mg, 0.2 mmol) and 1*H*-indole (**2a**, 24 mg, 0.2 mmol) in acetonitrile (5 mL) in the presence of iodine (5 mg, 10 mol%). The product was isolated as dark brown solid (65 mg, 77%). M.p: 134-136 °C. <sup>1</sup>H NMR (600 MHz, DMSO-*d*<sub>6</sub>) δ [ppm] = 11.19 (s, 1H, NH), 11.01 (s, 1H, NH), 7.55 – 7.48 (m, 1H), 7.45 – 7.31 (m, 2H), 7.30 – 7.21 (m, 4H), 7.05 – 6.97 (m, 2H), 6.96 – 6.82 (m, 2H), 6.81 – 6.74 (m, 2H), 6.17 (d, <sup>3</sup>*J*<sub>H,H</sub> = 7.8, Hz, 1H), 2.91 (s, 3H, CH<sub>3</sub>). <sup>13</sup>C NMR (151 MHz, DMSO-*d*<sub>6</sub>) δ [ppm] = 153.2, 140.7, 138.2, 136.7, 129.5, 127.4, 127.01 (d, <sup>1</sup>*J*<sub>C,F</sub> = 287.9 Hz, 1C, CF<sub>3</sub>), 126.9, 126.7, 126.1, 123.7, 122.3, 121.0, 120.4, 118.5, 116.7, 113.8, 113.5, 113.1, 111.8, 111.6, 104.6, 100.3, 55.99 (d, <sup>2</sup>*J*<sub>C,F</sub> = 25.5 Hz, 1C, C<sub>q</sub>), 53.8 (1C, CH<sub>3</sub>). <sup>19</sup>F NMR (565 MHz, DMSO-*d*<sub>6</sub>) δ [ppm] = -62.73 (s, 3F, CF<sub>3</sub>). LC-MS: positive [*m/z*] = 421.2 [M+H]<sup>+</sup>. Purity by HPLC-UV (254 nm) ESI-MS: 98.0%. HRMS (ESI-QTOF) calculated for C<sub>25</sub>H<sub>19</sub>F<sub>3</sub>N<sub>2</sub>O [M + H]<sup>+</sup>: 421.1528 found: 421.1521.

**5-Fluoro-3-(2,2,2-trifluoro-1-(4-methoxy-1*H*-indol-3-yl)-1-phenylethyl)-1*H*-indole (3j):** The compound **3j** was synthesized by the reaction of 2,2,2-trifluoro-1-(4-methoxy-1*H*-indol-3-yl)-1-phenylethan-1-ol (**1a**, 64 mg, 0.2 mmol) and 5-fluoro-1*H*-indole (**2d**, 84 mg, 0.62 mmol) in acetonitrile (5 mL) in the presence of iodine (5 mg, 10 mol%). The product was isolated as brown solid (78 mg, 89%). M.p: 124-126 °C. <sup>1</sup>H NMR (600 MHz, DMSO-*d*<sub>6</sub>) δ [ppm] = 11.23 (d, <sup>4</sup>*J*<sub>H,H</sub> = 2.8 Hz, 1H, NH), 11.15 (d, <sup>4</sup>*J*<sub>H,H</sub> = 3.1 Hz, 1H, NH), 7.50 (d, <sup>3</sup>*J*<sub>H,H</sub> = 7.5 Hz, 2H), 7.35 (dd, <sup>3</sup>*J*<sub>H,H</sub> = 8.8 Hz, <sup>4</sup>*J*<sub>H,H</sub> = 4.9 Hz, 1H), 7.31 – 7.25 (m, 4H), 7.02 – 6.98 (m, 2H), 6.93 (t, <sup>3</sup>*J*<sub>H,H</sub> = 7.9 Hz, 1H), 6.86 (td, <sup>3</sup>*J*<sub>H,H</sub> = 9.0 Hz, <sup>4</sup>*J*<sub>H,H</sub> = 2.6 Hz, 1H), 6.80 – 6.73 (m, 1H), 6.17 (d, <sup>3</sup>*J*<sub>H,H</sub> = 7.7 Hz, 1H), 2.91 (s, 3H, CH<sub>3</sub>). <sup>13</sup>C NMR (151 MHz, DMSO-*d*<sub>6</sub>) δ [ppm] = 156.27 (d, <sup>1</sup>*J*<sub>C,F</sub> = 229.8 Hz, 1C, CF<sub>arom</sub>), 153.2, 140.2, 138.2, 133.3, 129.4, 129.3, 129.27 (q, <sup>1</sup>*J*<sub>C,F</sub> = 283.9 Hz, 1C, CF<sub>3</sub>), 127.1, 126.8, 126.34 (d, <sup>4</sup>*J*<sub>C,F</sub> = 10.8 Hz, 1C, CH<sub>arom</sub>), 123.6, 122.4, 116.7, 113.9, 113.0, 112.4, 112.4, 108.7, 108.6, 105.93 (dd, <sup>2</sup>*J*<sub>C,F</sub> = 27.3 Hz, <sup>3</sup>*J*<sub>C,F</sub> = 7.0 Hz, 1C, CH<sub>arom</sub>), 104.7,



100.3, 55.70 (q,  $^2J_{C,F}$  = 30.3 Hz, 1C, C<sub>q</sub>), 53.8 (1C, CH<sub>3</sub>).  $^{19}\text{F}$  NMR (565 MHz, DMSO-*d*<sub>6</sub>)  $\delta$  [ppm] = -63.28 (s, 3F, CF<sub>3</sub>), -124.18 – -126.25 (m, 1F, F<sub>arom</sub>). LC-MS: positive [*m/z*] = 439.2 [M+H]<sup>+</sup>. Purity by HPLC-UV (254 nm) ESI-MS: 97%. HRMS (ESI-QTOF) calculated for C<sub>25</sub>H<sub>18</sub>F<sub>4</sub>N<sub>2</sub>O [M + H]<sup>+</sup>: 439.1434 found: 439.1433.

**6-Methoxy-3-(2,2,2-trifluoro-1-(1*H*-indol-3-yl)-1-phenylethyl)-1*H*-indole (3k):** The compound **3k** was synthesized by the reaction of 2,2,2-trifluoro-1-(6-methoxy-1*H*-indol-3-yl)-1-phenylethan-1-ol (**1c**, 64 mg, 0.2 mmol) and 1*H*-indole (**2a**, 24 mg, 0.2 mmol) in acetonitrile (5 mL) in the presence of iodine (5 mg, 10 mol%). The product was isolated (59 mg, 70%) as light brown solid. M.p: 89-91 °C.  $^1\text{H}$  NMR (600 MHz, DMSO-*d*<sub>6</sub>)  $\delta$  [ppm] = 11.16 (s, 1H, NH), 10.95 (s, 1H, NH), 7.46 – 7.30 (m, 6H), 7.02 (t,  $^3J_{H,H}$  = 7.5 Hz, 1H), 6.94 – 6.85 (m, 3H), 6.80 – 6.71 (m, 3H), 6.44 (dd,  $^3J_{H,H}$  = 8.9 Hz,  $^4J_{H,H}$  = 2.4 Hz, 1H), 3.72 (s, 3H, CH<sub>3</sub>).  $^{13}\text{C}$  NMR (151 MHz, DMSO-*d*<sub>6</sub>)  $\delta$  [ppm] = 155.2, 139.2, 137.5, 136.7, 131.05 (q,  $^1J_{H,H}$  = 283.1 Hz, 1C, CF<sub>3</sub>), 129.0 (2C, CH), 127.9 (2C, CH), 127.5, 126.5, 125.9, 125.2, 121.6, 121.0, 120.9, 120.2, 118.7, 113.2, 113.1, 111.7, 109.0, 94.5, 55.19 (q,  $^2J_{H,H}$  = 25.2 Hz, 1C, C<sub>q</sub>), 55.0 (1C, CH<sub>3</sub>).  $^{19}\text{F}$  NMR (565 MHz, DMSO-*d*<sub>6</sub>)  $\delta$  [ppm] = - 62.30 (s, 3F, CF<sub>3</sub>). LC-MS: positive [*m/z*] = 421.2 [M+H]<sup>+</sup>. Purity by HPLC-UV (254 nm) ESI-MS: 99.0%. HRMS (ESI-QTOF) calculated for C<sub>25</sub>H<sub>19</sub>F<sub>3</sub>N<sub>2</sub>O [M + H]<sup>+</sup>: 421.1528 found: 421.1520.

**7-Bromo-3-(2,2,2-trifluoro-1-(6-methoxy-1*H*-indol-3-yl)-1-phenylethyl)-1*H*-indole (3l):** The compound **3l** was synthesized by the reaction of 2,2,2-trifluoro-1-(6-methoxy-1*H*-indol-3-yl)-1-phenylethan-1-ol (**1c**, 64 mg, 0.2 mmol) and 7-bromo-1*H*-indole (**2g**, 39 mg, 0.2 mmol) in acetonitrile (5 mL) in the presence of iodine (5 mg, 10 mol%). The product was isolated as brown solid (72 mg, 72%). M.p: 92-94 °C.  $^1\text{H}$  NMR (600 MHz, DMSO-*d*<sub>6</sub>)  $\delta$  [ppm] = 11.42 (s, 1H, NH), 10.99 (s, 1H, NH), 7.37 (m, 5H), 7.27 (d,  $^3J_{H,H}$  = 7.5 Hz, 1H), 6.97 – 6.85 (m, 3H), 6.78 – 6.70 (m, 3H), 6.46 (dd,  $^3J_{H,H}$  = 8.9 Hz,  $^4J_{H,H}$  = 2.4 Hz, 1H), 3.73 (s, 3H, CH<sub>3</sub>).  $^{13}\text{C}$  NMR (151 MHz, DMSO-*d*<sub>6</sub>)  $\delta$  [ppm] = 155.2, 138.8, 137.5, 134.9, 129.0, 128.9, 128.14 (q,  $^1J_{H,H}$  =

283.4 Hz, 1C, CF<sub>3</sub>), 128.0 (2C, CH), 127.7, 127.6, 127.6, 125.3, 123.7, 121.4, 120.6, 120.2, 120.1, 114.6, 112.8, 109.2, 104.4, 94.6, 55.23 (q, <sup>2</sup>J<sub>H,H</sub> = 24.6 Hz, 1C, C<sub>q</sub>), 55.0 (1C, CH<sub>3</sub>). <sup>19</sup>F NMR (565 MHz, DMSO-*d*<sub>6</sub>) δ [ppm] = -62.30 (s, 3F, CF<sub>3</sub>). LC-MS: positive [*m/z*] = 499.3 [M+H]<sup>+</sup>. Purity by HPLC-UV (254 nm) ESI-MS: 99%. HRMS (ESI-QTOF) calculated for C<sub>25</sub>H<sub>18</sub>BrF<sub>3</sub>N<sub>2</sub>O [M + H]<sup>+</sup>: 499.0633 found: 499.0639.

### 5,6-Difluoro-3-(2,2,2-trifluoro-1-(6-fluoro-1*H*-indol-3-yl)-1-phenylethyl)-1*H*-indole

**(3m):** The compound **3m** was synthesized by the reaction of 2,2,2-trifluoro-1-(6-fluoro-1*H*-indol-3-yl)-1-phenylethan-1-ol (**1d**, 62 mg, 0.2 mmol) and 5,6-difluoro-1*H*-indole (**2h**, 99 mg, 0.62 mmol) in acetonitrile (5 mL) in the presence of iodine (5 mg, 10 mol%). The product was isolated as dark yellow solid (81 mg, 89%). M.p: 167-169 °C. <sup>1</sup>H NMR (600 MHz, DMSO-*d*<sub>6</sub>) δ [ppm] = 11.41 (s, 1H, NH), 11.30 (s, 1H, NH), 7.42 (dd, <sup>3</sup>J<sub>H,H</sub> = 11.0 Hz, <sup>3</sup>J<sub>H,H</sub> = 7.2 Hz, 1H), 7.37 (m, 5H), 7.19 (dd, <sup>3</sup>J<sub>H,H</sub> = 9.8 Hz, <sup>4</sup>J<sub>H,H</sub> = 2.5 Hz, 1H), 7.08 (d, <sup>4</sup>J<sub>H,H</sub> = 2.5 Hz, 1H), 6.97 (d, <sup>4</sup>J<sub>H,H</sub> = 2.5 Hz, 1H), 6.77 (dd, <sup>3</sup>J<sub>H,H</sub> = 9.0 Hz, <sup>4</sup>J<sub>H,H</sub> = 5.4 Hz, 1H), 6.65 (td, <sup>3</sup>J<sub>H,H</sub> = 9.0 Hz, <sup>4</sup>J<sub>H,H</sub> = 2.5 Hz, 1H), 6.51 (dd, <sup>3</sup>J<sub>H,H</sub> = 12.3 Hz, <sup>4</sup>J<sub>H,H</sub> = 8.0 Hz, 1H). <sup>13</sup>C NMR (151 MHz, DMSO-*d*<sub>6</sub>) δ [ppm] = 158.65 (d, <sup>1</sup>J<sub>C,F</sub> = 235.5 Hz, 1C, CF<sub>arom</sub>), 146.46 (dd, <sup>1</sup>J<sub>C,F</sub> = 238.5 Hz, <sup>2</sup>J<sub>C,F</sub> = 16.1 Hz, 1C, CF<sub>arom</sub>), 144.75 (dd, <sup>1</sup>J<sub>C,F</sub> = 233.8 Hz, <sup>2</sup>J<sub>C,F</sub> = 15.1 Hz, 1C, CF<sub>arom</sub>), 138.6, 136.89 (d, <sup>2</sup>J<sub>C,F</sub> = 13.0 Hz, 1C, CH<sub>arom</sub>), 132.00 (d, <sup>2</sup>J<sub>C,F</sub> = 11.1 Hz, 1C, CH<sub>arom</sub>), 129.1, 128.6, 128.4 (2C, CH), 128.31 (q, <sup>1</sup>J<sub>C,F</sub> = 281.6 Hz, 1C, C<sub>q</sub>), 128.1, 127.4, 122.8, 121.9, 121.8, 121.50 (d, <sup>3</sup>J<sub>C,F</sub> = 9.0 Hz, 1C, C<sub>q</sub>), 113.28 (m, 1C, C<sub>q</sub>), 112.9, 107.7, 107.6, 107.2, 99.8, 99.7, 97.7, 55.09 (q, <sup>2</sup>J<sub>C,F</sub> = 26.3 Hz, 1C, C<sub>q</sub>). <sup>19</sup>F NMR (565 MHz, DMSO-*d*<sub>6</sub>) δ [ppm] = -62.73 (s, 3F, CF<sub>3</sub>), -121.91 (m, 1F, F<sub>arom</sub>), -145.11 – -145.34 (m, 1F, F<sub>arom</sub>), -148.12 (m, 1F, F<sub>arom</sub>). LC-MS: positive [*m/z*] = 445 [M+H]<sup>+</sup>. Purity by HPLC-UV (254 nm) ESI-MS: 99%. HRMS (ESI-QTOF) calculated for C<sub>24</sub>H<sub>14</sub>F<sub>6</sub>N<sub>2</sub> [M + H]<sup>+</sup>: 445.1139 found: 445.1129.

**5,6-Difluoro-3-(2,2,2-trifluoro-1-(1*H*-indol-3-yl)-1-phenylethyl)-1*H*-indole (3n):** The compound **3n** was synthesized by the reaction of 2,2,2-trifluoro-1-(1*H*-indol-3-yl)-1-phenylethan-1-ol (**1e**, 58 mg, 0.2 mmol) and 5,6-difluoro-1*H*-indole (**2h**, 30 mg, 0.2 mmol) in acetonitrile (5 mL) in the presence of iodine (5 mg, 10 mol%). The product was isolated as brown solid (61 mg, 99%). M.p: 188-190 °C. <sup>1</sup>H NMR (600 MHz, DMSO-*d*<sub>6</sub>) δ [ppm] = 11.38 (s, 1H, NH), 11.23 (s, 1H, NH), 7.44 – 7.35 (m, 7H), 7.08 (d, <sup>4</sup>*J*<sub>H,H</sub> = 2.6 Hz, 1H), 7.03 (m, 1H), 6.94 (d, <sup>4</sup>*J*<sub>H,H</sub> = 2.6 Hz, 1H), 6.83 (d, <sup>3</sup>*J*<sub>H,H</sub> = 8.2 Hz, 1H), 6.76 (m, 1H), 6.52 (m, 1H). <sup>13</sup>C NMR (151 MHz, DMSO-*d*<sub>6</sub>) δ [ppm] = 146.24 (dd, <sup>1</sup>*J*<sub>C,F</sub> = 238.4 Hz, <sup>2</sup>*J*<sub>C,F</sub> = 15.1 Hz, 1C, CF<sub>arom</sub>), 144.52 (dd, <sup>1</sup>*J*<sub>C,F</sub> = 233.7 Hz, <sup>2</sup>*J*<sub>C,F</sub> = 15.1 Hz, 1C, CF<sub>arom</sub>), 138.6, 136.7, 131.80 (q, <sup>3</sup>*J*<sub>C,F</sub> = 11.0 Hz, 1C, C<sub>q</sub>), 128.9, 128.4, 128.2 (q, <sup>1</sup>*J*<sub>C,F</sub> = 283.1 Hz, 1C, CF<sub>3</sub>), 128.1 (2C, CH), 127.8, 126.5, 125.8, 121.36 (d, <sup>3</sup>*J*<sub>C,F</sub> = 11.0 Hz, 1C, C<sub>q</sub>), 121.1, 120.7, 118.8, 113.3, 112.5, 111.9, 106.95 (d, <sup>2</sup>*J*<sub>C,F</sub> = 23.4 Hz, 1C, C<sub>q</sub>), 99.5, 99.4, 54.98 (d, <sup>2</sup>*J*<sub>C,F</sub> = 26.4 Hz, 1C, C<sub>q</sub>). <sup>19</sup>F NMR (565 MHz, DMSO-*d*<sub>6</sub>) δ [ppm] = -62.60 (s, 3F, CF<sub>3</sub>), -145.23 – -145.38 (m, 1F, F<sub>arom</sub>), -148.16 – -148.30 (m, 1F, F<sub>arom</sub>). LC-MS: positive [*m/z*] = 427. [M+H]<sup>+</sup>. Purity by HPLC-UV (254 nm) ESI-MS: 99%. HRMS (ESI-QTOF) calculated for C<sub>24</sub>H<sub>15</sub>F<sub>5</sub>N<sub>2</sub> [M + H]<sup>+</sup>: 427.1234 found: 427.1239.

**2-Methyl-3-(2,2,2-trifluoro-1-(1*H*-indol-3-yl)-1-phenylethyl)-1*H*-indole (3o):** The compound **3o** was synthesized by the reaction of 2,2,2-trifluoro-1-(1*H*-indol-3-yl)-1-phenylethan-1-ol (**1e**, 58 mg, 0.2 mmol) and 2-methyl-1*H*-indole (**1m**, 26 mg, 0.2 mmol) in acetonitrile (5 mL) in the presence of iodine (5 mg, 10 mol%). The product was isolated (0.246 g, 87%) as white solid. M.p: 206.4 °C. <sup>1</sup>H NMR (600 MHz, DMSO-*d*<sub>6</sub>) δ [ppm] = 11.16 (s, 1H, NH), 11.07 (s, 1H, NH), 7.58 – 7.52 (m, 2H), 7.37 (d, <sup>3</sup>*J*<sub>H,H</sub> = 8.2 Hz, 1H), 7.33 – 7.24 (m, 4H), 7.12 – 7.07 (m, 1H), 7.01 (t, <sup>3</sup>*J*<sub>H,H</sub> = 7.6 Hz, 1H), 6.97 – 6.91 (m, 2H), 6.75 (t, <sup>3</sup>*J*<sub>H,H</sub> = 8.3 Hz, 1H), 6.66 – 6.62 (m, 1H), 6.53 (d, <sup>3</sup>*J*<sub>H,H</sub> = 8.2 Hz, 1H), 1.57 (s, 3H, CH<sub>3</sub>). <sup>13</sup>C NMR (151 MHz, DMSO-*d*<sub>6</sub>) δ [ppm] = 140.5, 136.5, 135.8, 134.7, 128.6, 128.6, 127.9 (2C, CH), 127.8, 128.2 (q, <sup>1</sup>*J*<sub>C,F</sub> = 282.2 Hz, 1C, CF<sub>3</sub>), 127.1, 126.2, 124.7, 120.9, 120.8, 120.7, 119.8, 118.8, 118.2,

114.3, 111.7, 110.3, 107.4, 55.69 (q,  $^2J_{C,F}$  = 25.5 Hz, 1C, C<sub>q</sub>), 13.5.  $^{19}\text{F}$  NMR (565 MHz, DMSO-*d*<sub>6</sub>)  $\delta$  [ppm] = -60.8 (s, 3F, CF<sub>3</sub>). LC-MS: positive [*m/z*] = 405 [M+H]<sup>+</sup>. Purity by HPLC-UV (254 nm) ESI-MS: 99.0%. HRMS (ESI-QTOF) calculated for C<sub>25</sub>H<sub>19</sub>F<sub>3</sub>N<sub>2</sub> [M + H]<sup>+</sup>: 405.1579 found: 405.1573.

**5-Fluoro-3-(2,2,2-trifluoro-1-(5-methoxy-1*H*-indol-3-yl)-1-(*p*-tolyl)ethyl)-1*H*-indole (3p):**

The compound **3p** was synthesized by the reaction of 2,2,2-trifluoro-1-(5-methoxy-1*H*-indol-3-yl)-1-(*p*-tolyl)ethan-1-ol (**1f**, 67 mg, 0.2 mmol) and 5-fluoro-1*H*-indole (**2d**, 27 mg, 0.20 mmol) in acetonitrile (5 mL) in the presence of iodine (5 mg, 10 mol%). The product was isolated red brown solid (90 mg, 99%). M.p: 94-96 °C.  $^1\text{H}$  NMR (600 MHz, DMSO-*d*<sub>6</sub>)  $\delta$  [ppm] = 11.30 (s, 1H, NH), 11.06 (s, 1H, NH), 7.40 (dd,  $^3J_{H,H}$  = 8.9 Hz,  $^4J_{H,H}$  = 4.8 Hz, 1H), 7.29 (d,  $^3J_{H,H}$  = 8.4 Hz, 3H), 7.17 (d,  $^3J_{H,H}$  = 8.1 Hz, 2H), 7.05 (d,  $^4J_{H,H}$  = 2.7 Hz, 1H), 6.95 (d,  $^4J_{H,H}$  = 2.6 Hz, 1H), 6.88 (td,  $^3J_{H,H}$  = 9.0 Hz,  $^4J_{H,H}$  = 2.6 Hz, 1H), 6.68 (dd,  $^3J_{H,H}$  = 8.8 Hz,  $^4J_{H,H}$  = 2.4 Hz, 1H), 6.46 (dd,  $^3J_{H,H}$  = 11.1 Hz,  $^4J_{H,H}$  = 2.5 Hz, 1H), 6.16 (d,  $^4J_{H,H}$  = 2.4 Hz, 1H), 3.38 (s, 3H, CH<sub>3</sub>), 2.31 (s, 3H, CH<sub>3</sub>).  $^{13}\text{C}$  NMR (151 MHz, DMSO-*d*<sub>6</sub>)  $\delta$  [ppm] = 156.28 (d,  $^1J_{C,F}$  = 231.0 Hz, 1C, CF<sub>arom</sub>), 152.6, 136.8, 135.7, 133.4, 131.8, 129.20 (q,  $^1J_{C,F}$  = 283.3 Hz, 1C, CF<sub>3</sub>), 129.0, 128.6, 128.5, 126.7, 126.3, 126.18 (q,  $^3J_{C,F}$  = 10.6 Hz, 1C, C<sub>q</sub>), 113.28 (q,  $^3J_{C,F}$  = 6.0 Hz, 1C, C<sub>q</sub>), 112.8, 112.7, 112.3, 112.2, 110.8, 109.4, 109.2, 105.45 (d,  $^2J_{C,F}$  = 27.3 Hz, 1C, CH<sub>arom</sub>), 103.0, 54.8 (1C, CH<sub>3</sub>), 54.67 (q,  $^2J_{C,F}$  = 26.1 Hz, 1C, C<sub>q</sub>), 20.5 (1C, CH<sub>3</sub>).  $^{19}\text{F}$  NMR (565 MHz, DMSO-*d*<sub>6</sub>)  $\delta$  [ppm] = -62.76 (s, 3F, CF<sub>3</sub>), -122.68 – -126.04 (m, 1F, F<sub>arom</sub>). LC-MS: positive [*m/z*] = 453.2 [M+H]<sup>+</sup>. Purity by HPLC-UV (254 nm) ESI-MS: 99.0%. HRMS (ESI-QTOF) calculated for C<sub>26</sub>H<sub>20</sub>F<sub>4</sub>N<sub>2</sub>O [M + H]<sup>+</sup>: 453.1590 found: 453.1583.

**6-Fluoro-3-(2,2,2-trifluoro-1-(5-methoxy-1*H*-indol-3-yl)-1-(*p*-tolyl)ethyl)-1*H*-indole (3q):**

The compound **3q** was synthesized by the reaction of 2,2,2-trifluoro-1-(5-methoxy-1*H*-indol-3-yl)-1-(*p*-tolyl)ethan-1-ol (**1f**, 67 mg, 0.2 mmol) and 5-fluoro-1*H*-indole (**2e**, 27 mg, 0.20 mmol) in acetonitrile (5 mL) in the presence of iodine (5 mg, 10 mol%). The product was

isolated as brown solid (89.mg, 98%). M.p: 92-94 °C.  $^1\text{H}$  NMR (600 MHz, DMSO- $d_6$ )  $\delta$  [ppm] = 11.22 (s, 1H, NH), 11.05 (s, 1H, NH), 7.28 (m, 3H), 7.21 – 7.12 (m, 3H), 6.94 (dd,  $^3J_{\text{H,H}} = 6.3$  Hz,  $^4J_{\text{H,H}} = 2.6$  Hz, 2H), 6.84 (m, 1H), 6.71 – 6.61 (m, 2H), 6.18 (d,  $^4J_{\text{H,H}} = 2.4$  Hz, 1H), 3.39 (s, 3H), 2.30 (s, 3H).  $^{13}\text{C}$  NMR (151 MHz, DMSO- $d_6$ )  $\delta$  [ppm] = 152.6, 158.45 (d,  $^1J_{\text{C,F}} = 235.1$  Hz, 1C,  $\text{CF}_{\text{arom}}$ ), 136.8, 136.71 (d,  $^2J_{\text{C,F}} = 12.4$  Hz, 1C,  $\text{CH}_{\text{arom}}$ ), 135.9, 131.8, 129.22 (d,  $^1J_{\text{C,F}} = 283.2$  Hz, 1C,  $\text{CF}_3$ ), 129.0, 128.6, 127.3, 126.7, 126.4, 122.09 (d,  $^2J_{\text{C,F}} = 13.6$  Hz, 1C,  $\text{CH}_{\text{arom}}$ ), 122.8, 113.5, 112.5, 112.2, 110.8, 107.4, 107.2, 103.1, 97.6, 97.4, 54.9, 54.67 (d,  $^2J_{\text{C,F}} = 26.3$  Hz, 1C,  $\text{C}_q$ ), 20.5 (1C,  $\text{CH}_3$ ).  $^{19}\text{F}$  NMR (565 MHz, DMSO- $d_6$ )  $\delta$  [ppm] = -62.68 (s, 3F,  $\text{CF}_3$ ), -121.52 – -122.62 (m, 1F,  $\text{F}_{\text{arom}}$ ). LC-MS: positive  $[m/z] = 453.2$   $[\text{M}+\text{H}]^+$ . Purity by HPLC-UV (254 nm) ESI-MS: 99%. HRMS (ESI-QTOF) calculated for  $\text{C}_{26}\text{H}_{20}\text{F}_4\text{N}_2\text{O}$   $[\text{M} + \text{H}]^+$ : 453.1590 found: 453.1583.

**5,6-Difluoro-3-(2,2,2-trifluoro-1-(4-fluorophenyl)-1-(5-methoxy-1*H*-indol-3-yl)ethyl)-1*H*-indole (3r):** The compound **3r** was synthesized by the reaction of 2,2,2-trifluoro-1-(4-fluorophenyl)-1-(5-methoxy-1*H*-indol-3-yl)ethan-1-ol (**1g**, 68 mg, 0.2 mmol) and 5,6-difluoro-1*H*-indole (**2h**, 31 mg, 0.2 mmol) in acetonitrile (5 mL) in the presence of iodine (5 mg, 10 mol%). The product was isolated as brown solid (83 mg, 87%). M.p: 102-104 °C.  $^1\text{H}$  NMR (600 MHz, DMSO- $d_6$ )  $\delta$  [ppm] = 11.41 (s, 1H, NH), 11.14 (s, 1H, NH), 7.46 – 7.39 (m, 3H), 7.31 (d,  $^3J_{\text{H,H}} = 8.8$  Hz, 1H), 7.25 – 7.18 (m, 2H), 7.09 (d,  $^4J_{\text{H,H}} = 2.7$  Hz, 1H), 6.99 (d,  $^4J_{\text{H,H}} = 2.7$  Hz, 1H), 6.70 (dd,  $^3J_{\text{H,H}} = 8.8$  Hz,  $^4J_{\text{H,H}} = 2.4$  Hz, 1H), 6.56 (m, 1H), 6.12 (d,  $^4J_{\text{H,H}} = 2.4$  Hz, 1H), 3.39 (s, 3H).  $^{13}\text{C}$  NMR (151 MHz, DMSO- $d_6$ )  $\delta$  [ppm] = 161.45 (d,  $^1J_{\text{C,F}} = 245.0$  Hz,  $\text{CF}_{\text{arom}}$ ), 152.8, 146.32 (dd,  $^1J_{\text{C,F}} = 238.7$  Hz,  $^2J_{\text{C,F}} = 16.2$  Hz, 1C,  $\text{CF}_{\text{arom}}$ ), 144.62 (dd,  $^1J_{\text{C,F}} = 233.9$  Hz,  $^2J_{\text{C,F}} = 15.0$  Hz, 1C,  $\text{CF}_{\text{arom}}$ ), 134.7, 132.0, 131.9, 131.2, 131.1, 128.6, 128.97 (q,  $^1J_{\text{C,F}} = 283.8$  Hz, 1C,  $\text{CF}_3$ ), 126.8, 126.1, 121.30 (d,  $^3J_{\text{C,F}} = 9.2$  Hz, 1C,  $\text{C}_q$ ), 115.1, 114.9, 113.2, 112.4, 111.8, 111.0, 106.96 (d,  $^2J_{\text{C,F}} = 23.6$  Hz, CH), 102.8, 99.6, 54.9, 54.41 (q,  $^2J_{\text{C,F}} = 25.8$  Hz, 1C,  $\text{C}_q$ ).  $^{19}\text{F}$  NMR (565 MHz, DMSO- $d_6$ )  $\delta$  [ppm] = -63.12 (s, 3F,  $\text{CF}_3$ ), -113.65 – -115.76

(m, 1F,  $F_{\text{arom}}$ ), -144.28 – -146.12 (m, 1F,  $F_{\text{arom}}$ ), -147.57 – -148.49 (m, 1F,  $F_{\text{arom}}$ ). LC-MS: positive  $[m/z] = 475.3$  ( $[M+H]^+$ ). Purity by HPLC-UV (254 nm) ESI-MS: 97.0%. HRMS (ESI-QTOF) calculated for  $C_{26}H_{16}F_6N_2O$   $[M + H]^+$ : 475.1245 found: 475.1244.

**6-Bromo-3-(1-(4-bromophenyl)-2,2,2-trifluoro-1-(5-methoxy-1*H*-indol-3-yl)ethyl)-1*H*-**

**indole (3s):** The compound **3s** was synthesized by the reaction of 2,2,2-trifluoro-1-(4-bromophenyl)-1-(5-methoxy-1*H*-indol-3-yl)ethan-1-ol (**1h**, 80 mg, 0.2 mmol) and 6-bromo-1*H*-indole (**2j**, 40 mg, 0.50 mmol) in acetonitrile (5 mL) in the presence of iodine (5 mg, 10 mol%). The product was isolated as brown solid (104 g, 90%). M.p: 105-107 °C.  $^1\text{H}$  NMR (600 MHz,  $\text{DMSO}-d_6$ )  $\delta$  [ppm] = 11.35 (s, 1H, NH), 11.12 (s, 1H, NH), 7.63 – 7.55 (m, 3H), 7.32 (m, 3H), 7.04 – 6.91 (m, 3H), 6.83 – 6.67 (m, 2H), 6.15 (d,  $^4J_{\text{H,H}} = 2.4$  Hz, 1H), 3.40 (s, 3H,  $\text{CH}_3$ ).  $^{13}\text{C}$  NMR (151 MHz,  $\text{DMSO}-d_6$ )  $\delta$  [ppm] = 152.7, 138.1, 137.7, 131.8, 131.3 (2C, CH), 131.1 (2C, CH), 128.82 (q,  $^1J_{\text{C,F}} = 284.8$  Hz, 1C,  $\text{CF}_3$ ), 127.8, 126.8, 126.0, 124.8, 122.5, 121.8, 121.2, 114.4, 114.0, 112.8, 112.4, 111.6, 110.9, 102.8, 54.84 (q,  $^2J_{\text{C,F}} = 27.7$  Hz, 1C,  $\text{C}_q$ ), 54.8 (1C,  $\text{CH}_3$ ).  $^{19}\text{F}$  NMR (565 MHz,  $\text{DMSO}-d_6$ )  $\delta$  [ppm] = -62.83 (s, 3F,  $\text{CF}_3$ ). LC-MS: positive  $[m/z] = 579$   $[M+H]^+$ . Purity by HPLC-UV (254 nm) ESI-MS: 99%. HRMS (ESI-QTOF) calculated for  $C_{26}H_{16}F_6N_2O$   $[M + H]^+$ : 576.9738 found: 576.9731.

**7-Bromo-3-(1-(4-bromophenyl)-2,2,2-trifluoro-1-(5-methoxy-1*H*-indol-3-yl)ethyl)-1*H*-**

**indole (3t):** The compound **3t** was synthesized by the reaction of 2,2,2-trifluoro-1-(4-bromophenyl)-1-(5-methoxy-1*H*-indol-3-yl)ethan-1-ol (**1h**, 80 mg, 0.2 mmol) and 7-bromo-1*H*-indole (**2g**, 40 mg, 0.50 mmol) in acetonitrile (5 mL) in the presence of iodine (5 mg, 10 mol%). The product was isolated as brown solid (95 g, 82%). M.p: 96-98 °C.  $^1\text{H}$  NMR (600 MHz,  $\text{DMSO}-d_6$ )  $\delta$  [ppm] = 11.48 (s, 1H, NH), 11.14 (s, 1H, NH), 7.62 – 7.55 (m, 2H), 7.40 – 7.27 (m, 4H), 7.00 – 6.87 (m, 3H), 6.82 – 6.68 (m, 2H), 6.18 (d,  $^4J_{\text{H,H}} = 2.4$  Hz, 1H), 3.41 (s, 3H,  $\text{CH}_3$ ).  $^{13}\text{C}$  NMR (151 MHz,  $\text{DMSO}-d_6$ )  $\delta$  [ppm] = 152.8, 135.1, 131.9, 131.3, 131.1, 130.7, 128.80 (q,  $^1J_{\text{C,F}} = 283.7$  Hz, 1C,  $\text{CF}_3$ ), 127.9 (2C, CH), 127.4, 126.9, 126.0, 125.0, 123.9, 121.3,

120.5, 120.4, 114.0, 112.5, 111.7, 111.0, 104.5, 102.8, 54.9 (1C, CH<sub>3</sub>), 54.88 (q, <sup>2</sup>J<sub>C,F</sub> = 25.6 Hz, 1C, C<sub>q</sub>). <sup>19</sup>F NMR (565 MHz, DMSO-*d*<sub>6</sub>) δ [ppm] = -62.67 (s, 3F, CF<sub>3</sub>). LC-MS: positive [*m/z*] = 579.1 [M+H]<sup>+</sup>. Purity by HPLC-UV (254 nm) ESI-MS: 99%. HRMS (ESI-QTOF) calculated for C<sub>25</sub>H<sub>17</sub>Br<sub>2</sub>F<sub>3</sub>N<sub>2</sub>O [M + H]<sup>+</sup>: 576.9738 found: 576.9734.

**3-(1-(4-Bromophenyl)-2,2,2-trifluoro-1-(5-methoxy-1*H*-indol-3-yl)ethyl)-5,6-difluoro-1*H*-indole (3u):** The compound **3u** was synthesized by the reaction of 2,2,2-trifluoro-1-(4-bromophenyl)-1-(5-methoxy-1*H*-indol-3-yl)ethan-1-ol (**1h**, 80 mg, 0.2 mmol) and 5,6-difluoro-1*H*-indole (**2h**, 31 mg, 0.2 mmol) in acetonitrile (5 mL) in the presence of iodine (5 mg, 10 mol%). The product was isolated as light brown solid (99 mg, 92%). M.p: 155-157 °C. <sup>1</sup>H NMR (600 MHz, DMSO-*d*<sub>6</sub>) δ [ppm] = 11.42 (s, 1H, NH), 11.15 (s, 1H, NH), 7.61 – 7.58 (m, 2H), 7.43 (dd, <sup>3</sup>J<sub>H,H</sub> = 11.0 Hz, <sup>3</sup>J<sub>H,H</sub> = 7.1 Hz, 1H), 7.32 (m, 3H), 7.09 (d, <sup>4</sup>J<sub>H,H</sub> = 2.6 Hz, 1H), 7.00 (d, <sup>4</sup>J<sub>H,H</sub> = 2.6 Hz, 1H), 6.70 (dd, <sup>3</sup>J<sub>H,H</sub> = 8.8 Hz, <sup>4</sup>J<sub>H,H</sub> = 2.4 Hz, 1H), 6.59 (m, 1H), 6.11 (d, <sup>4</sup>J<sub>H,H</sub> = 2.4 Hz, 1H), 3.39 (s, 3H, CH<sub>3</sub>). <sup>13</sup>C NMR (151 MHz, DMSO-*d*<sub>6</sub>) δ [ppm] = 152.8, 146.31 (dd, <sup>1</sup>J<sub>C,F</sub> = 238.8 Hz, <sup>2</sup>J<sub>C,F</sub> = 16.1 Hz, 1C, CF<sub>arom</sub>), 144.61 (dd, <sup>1</sup>J<sub>C,F</sub> = 234.0 Hz, <sup>2</sup>J<sub>C,F</sub> = 15.1 Hz, 1C, CF<sub>arom</sub>), 137.9, 132.0, 131.9, 131.8, 131.2, 131.2, 128.7, 127.76 (q, <sup>1</sup>J<sub>C,F</sub> = 285.6 Hz, 1C, CF<sub>3</sub>), 126.8, 121.3, 121.2, 112.8, 112.4 (2C, CH), 111.3, 111.0, 107.10 – 106.77 (m, 1C, CH), 102.6, 99.7, 99.6, 54.8, 54.77 (q, <sup>2</sup>J<sub>C,F</sub> = 26.7 Hz, 1C, C<sub>q</sub>). <sup>19</sup>F NMR (565 MHz, DMSO-*d*<sub>6</sub>) δ [ppm] = -62.96 (s, 3F, CF<sub>3</sub>), -142.56 – -146.59 (m, 1F, F<sub>arom</sub>), -147.95 (m, 1F, F<sub>arom</sub>). LC-MS: positive [*m/z*] = 537.0 [M+H]<sup>+</sup>. Purity by HPLC-UV (254 nm) ESI-MS: 96.0%. HRMS (ESI-QTOF) calculated for C<sub>25</sub>H<sub>16</sub>BrF<sub>5</sub>N<sub>2</sub>O [M + H]<sup>+</sup>: 535.0444 found: 535.0440.

**5-Methoxy-3-(2,2,2-trifluoro-1-(1*H*-indol-3-yl)-1-(thiophen-2-yl)ethyl)-1*H*-indole (3v):** The compound **3v** was synthesized by the reaction of 2,2,2-trifluoro-1-(5-methoxy-1*H*-indol-3-yl)-1-(thiophen-2-yl)ethan-1-ol (**1i**, 65 mg, 0.2 mmol) and 1*H*-indole (**2a**, 24 mg, 0.2 mmol) in acetonitrile (5 mL) in the presence of iodine (5 mg, 10 mol%). The product was isolated as brown solid (76 mg, 89%). M.p: 105-107 °C. <sup>1</sup>H NMR (600 MHz, DMSO-*d*<sub>6</sub>) δ [ppm] = 11.24

(s, 1H, NH), 11.11 (s, 1H, NH), 7.49 – 7.45 (m, 1H), 7.39 (d,  $^3J_{\text{H,H}} = 8.2$  Hz, 1H), 7.26 (d,  $^3J_{\text{H,H}} = 8.8$  Hz, 1H), 7.23 – 7.16 (m, 3H), 7.06 (m, 1H), 6.99 (ddd,  $^3J_{\text{H,H}} = 8.1$  Hz,  $^3J_{\text{H,H}} = 6.9$  Hz,  $^4J_{\text{H,H}} = 1.1$  Hz, 1H), 6.82 (d,  $^3J_{\text{H,H}} = 8.2$  Hz, 1H), 6.71 (ddd,  $^3J_{\text{H,H}} = 8.1$  Hz,  $^3J_{\text{H,H}} = 6.9$  Hz,  $^4J_{\text{H,H}} = 1.1$  Hz, 1H), 6.64 (dd,  $^3J_{\text{H,H}} = 8.8$  Hz,  $^4J_{\text{H,H}} = 2.4$  Hz, 1H), 6.10 (d,  $^4J_{\text{H,H}} = 2.4$  Hz, 1H), 3.33 (s, 3H, CH<sub>3</sub>). <sup>13</sup>C NMR (151 MHz, DMSO-*d*<sub>6</sub>)  $\delta$  [ppm] = 152.5, 143.6, 136.6, 131.7, 129.47 (q,  $^1J_{\text{C,F}} = 282.3$  Hz, 1C, CF<sub>3</sub>), 127.8, 126.4, 126.4, 126.2, 126.0, 125.9, 125.8, 121.0, 120.8, 118.7, 112.8, 112.3, 112.1, 111.7, 110.7, 102.9, 54.8, 52.26 (d,  $^2J_{\text{C,F}} = 27.7$  Hz, 1C, C<sub>q</sub>). <sup>19</sup>F NMR (565 MHz, DMSO-*d*<sub>6</sub>)  $\delta$  [ppm] = -66.43 (s, 3F, CF<sub>3</sub>). LC-MS: positive [*m/z*] = 427 [M+H]<sup>+</sup>. Purity by HPLC-UV (254 nm) ESI-MS: 98.0%. HRMS (ESI-QTOF) calculated for C<sub>23</sub>H<sub>17</sub>F<sub>3</sub>N<sub>2</sub>OS [M + H]<sup>+</sup>: 427.1092 found: 427.1089.

**5-Fluoro-3-(2,2,2-trifluoro-1-(5-methoxy-1*H*-indol-3-yl)-1-(thiophen-2-yl)-ethyl)-1*H*-**

**indole (3w):** The compound **3v** was synthesized by the reaction of 2,2,2-trifluoro-1-(5-methoxy-1*H*-indol-3-yl)-1-(thiophen-2-yl)ethan-1-ol (**1i**, 65 mg, 0.2 mmol) and 5-fluoro-1*H*-indole (**2d**, 27 mg, 0.2 mmol) in acetonitrile (5 mL) in the presence of iodine (5 mg, 10 mol%). The product was isolated as light brown solid (80 mg, 90%). M.p: 221-223 °C. <sup>1</sup>H NMR (600 MHz, DMSO-*d*<sub>6</sub>)  $\delta$  [ppm] = 11.39 (s, 1H, NH), 11.15 (s, 1H, NH), 7.49 (m, 1H), 7.40 (m, 1H), 7.32 (d,  $^4J_{\text{H,H}} = 2.5$  Hz, 1H), 7.28 (d,  $J = 8.8$  Hz, 1H), 7.24 – 7.20 (m, 2H), 7.08 (m, 1H), 6.85 (td,  $^3J_{\text{H,H}} = 8.8$  Hz,  $^4J_{\text{H,H}} = 2.5$  Hz, 1H), 6.66 (dd,  $^3J_{\text{H,H}} = 8.8$  Hz,  $^4J_{\text{H,H}} = 2.5$  Hz, 1H), 6.35 (dd,  $^3J_{\text{H,H}} = 11.0$  Hz, 2.5 Hz, 1H), 6.07 (d,  $^4J_{\text{H,H}} = 2.5$  Hz, 1H), 3.32 (s, 3H, CH<sub>3</sub>). <sup>13</sup>C NMR (151 MHz, DMSO-*d*<sub>6</sub>)  $\delta$  [ppm] = 156.25 (d,  $^1J_{\text{C,F}} = 230.7$  Hz, 1C, CF<sub>arom</sub>), 152.6, 143.3, 133.3, 131.6, 129.36 (q,  $^1J_{\text{C,F}} = 279.4$  Hz, 1C, CF<sub>3</sub>), 127.8, 127.7, 126.6, 126.3, 126.2 (2C, CH), 126.2, 126.0, 112.2, 110.8, 109.5, 109.3, 105.2, 105.0, 102.7, 54.7 (1C, CH<sub>3</sub>), 52.03 (q,  $^2J_{\text{C,F}} = 28.4$  Hz, 1C, C<sub>q</sub>). <sup>19</sup>F NMR (565 MHz, DMSO-*d*<sub>6</sub>)  $\delta$  [ppm] = -66.66 (s, 3F, CF<sub>3</sub>), -124.60 – -124.71 (m, 1F, F<sub>arom</sub>). LC-MS: positive [*m/z*] = 445.0 [M+H]<sup>+</sup>. Purity by HPLC-UV (254 nm) ESI-MS: 97.0%. HRMS (ESI-QTOF) calculated for C<sub>23</sub>H<sub>16</sub>F<sub>4</sub>N<sub>2</sub>OS [M + H]<sup>+</sup>: 445.0998 found: 445.0995.



**5,6-Difluoro-3-(2,2,2-trifluoro-1-(5-methoxy-1*H*-indol-3-yl)-1-(thiophen-2-yl)ethyl)-1*H*-indole (3x):** The compound **3x** was synthesized by the reaction of 2,2,2-trifluoro-1-(5-methoxy-1*H*-indol-3-yl)-1-(thiophen-2-yl)ethan-1-ol (**1i**, 65 mg, 0.2 mmol) and 5,6-difluoro-1*H*-indole (**2h**, 31 mg, 0.2 mmol) in acetonitrile (5 mL) in the presence of iodine (5 mg, 10 mol%). The product was isolated as white solid (75.8 mg, 82%). M.p: 217-219 °C. <sup>1</sup>H NMR (600 MHz, DMSO-*d*<sub>6</sub>) δ [ppm] = 11.46 (s, 1H, NH), 11.18 (s, 1H, NH), 7.49 (m, 1H), 7.41 (m, 1H), 7.37 – 7.32 (m, 1H), 7.29 (d, <sup>3</sup>*J*<sub>H,H</sub> = 8.8 Hz, 1H), 7.26 – 7.21 (m, 2H), 7.09 (m, 1H), 6.67 (dd, <sup>3</sup>*J*<sub>H,H</sub> = 8.9 Hz, <sup>3</sup>*J*<sub>H,H</sub> = 2.4 Hz, 1H), 6.45 (m, 1H), 6.07 – 6.03 (m, 1H), 3.34 (s, 3H, CH<sub>3</sub>). <sup>13</sup>C NMR (151 MHz, DMSO-*d*<sub>6</sub>) δ [ppm] = 152.6, 146.25 (dd, <sup>1</sup>*J*<sub>C,F</sub> = 238.6 Hz, <sup>2</sup>*J*<sub>C,F</sub> = 16.2 Hz, 1C, CF<sub>arom</sub>), 144.50 (dd, *J* = 233.7 Hz, <sup>2</sup>*J*<sub>C,F</sub> = 15.2 Hz, 1C, CF<sub>arom</sub>), 143.1, 131.7, 131.6, 128.34 (q, *J* = 279.9 Hz, 1C, CF<sub>3</sub>), 127.8, 127.8, 126.6, 126.3, 126.2, 126.0, 121.43 (q, <sup>3</sup>*J*<sub>C,F</sub> = 9.1 Hz, 1C, C<sub>q</sub>), 113.05 (d, <sup>4</sup>*J*<sub>C,F</sub> = 5.7 Hz, 1C, C<sub>q</sub>), 112.3, 111.7, 110.9, 106.75 (d, <sup>2</sup>*J*<sub>C,F</sub> = 22.4 Hz, 1C, CH<sub>arom</sub>), 102.6, 99.48 (d, <sup>2</sup>*J*<sub>C,F</sub> = 21.5 Hz, 1C, CH<sub>arom</sub>), 54.8 (1C, CH<sub>3</sub>), 51.94 (q, <sup>2</sup>*J*<sub>C,F</sub> = 29.0 Hz, 1C, C<sub>q</sub>). <sup>19</sup>F NMR (565 MHz, DMSO-*d*<sub>6</sub>) δ [ppm] = -66.82 (s, 3F, CF<sub>3</sub>), -145.02 – -145.35 (m, 1F, F<sub>arom</sub>), -148.02 – -148.44 (m, 1F, F<sub>arom</sub>). LC-MS: positive [*m/z*] = 463 [M+H]<sup>+</sup>. Purity by HPLC-UV (254 nm) ESI-MS: 99.0%. HRMS (ESI-QTOF) calculated for C<sub>23</sub>H<sub>15</sub>F<sub>5</sub>N<sub>2</sub>OS [M + H]<sup>+</sup>: 463.0903 found: 463.0901.

**5-Fluoro-3-(2,2,3,3,3-pentafluoro-1-(5-methoxy-1*H*-indol-3-yl)-1-phenyl-propyl)-1*H*-indole (3y):** The compound **3y** was synthesized by the reaction of 2,2,2-trifluoro-1-(5-methoxy-1*H*-indol-3-yl)-1-(thiophen-2-yl)ethan-1-ol (**1j**, 75 mg, 0.20 mmol) and 5-fluoro-1*H*-indole (**2d**, 37 mg, 0.20 mmol) in acetonitrile (5 mL) in the presence of iodine (5 mg, 10 mol%). The product was isolated as white solid (0.96g, 96%). M.p: 104.9 °C. <sup>1</sup>H NMR (600 MHz, DMSO-*d*<sub>6</sub>) δ [ppm] = 11.32 (s, 1H, NH), 11.08 (s, 1H, NH), 7.64 – 7.56 (m, 2H), 7.40 – 7.21 (m, 7H), 6.85 (td, <sup>3</sup>*J*<sub>H,H</sub> = 9.0 Hz, <sup>4</sup>*J*<sub>H,H</sub> = 2.5 Hz, 1H), 6.66 (dd, <sup>3</sup>*J*<sub>H,H</sub> = 8.8 Hz, <sup>4</sup>*J*<sub>H,H</sub> = 2.4 Hz, 1H), 6.54 – 6.46 (m, 1H), 6.28 – 6.24 (m, 1H), 3.39 (s, 3H, CH<sub>3</sub>). <sup>13</sup>C NMR (151 MHz, DMSO-*d*<sub>6</sub>) δ

[ppm] = 156.08 (q,  $^1J_{C,F}$  = 230.8 Hz, 1C, CF<sub>arom</sub>), 152.4, 138.0, 133.1, 133.11 – 131.10 (m, 1C, CF<sub>3</sub>), 131.6, 129.7, 128.4, 127.7, 127.4, 126.8, 126.6, 126.6, 120.44 (m, 1C, CF<sub>2</sub>), 112.7, 112.6, 112.1, 111.7, 110.6, 110.5, 109.3, 109.1, 105.94 (d,  $^2J_{C,F}$  = 27.8 Hz, 1C, CH<sub>arom</sub>), 103.7, 54.9 (1C, CH<sub>3</sub>), 54.62 (q,  $^2J_{C,F}$  = 19.8 Hz, 1C, C<sub>q</sub>).  $^{19}\text{F}$  NMR (565 MHz, DMSO-*d*<sub>6</sub>)  $\delta$  [ppm] = -75.05 (s, 3F, CF<sub>3</sub>), -101.15 – -107.13 (m, 2F, CF<sub>2</sub>), -122.08 – -127.98 (m, 1F, F<sub>arom</sub>). LC-MS: positive [*m/z*] = 489.3 [M+H]<sup>+</sup>. Purity by HPLC-UV (254 nm) ESI-MS: 99%. HRMS (ESI-QTOF) calculated for C<sub>26</sub>H<sub>18</sub>F<sub>6</sub>N<sub>2</sub>O [M + H]<sup>+</sup>: 489.1402 found: 489.1407.

**6-Bromo-3-(2,2,3,3,3-pentafluoro-1-(5-methoxy-1*H*-indol-3-yl)-1-phenylpropyl)-1*H*-**

**indole (3z):** The compound **3z** was synthesized by the reaction of 2,2,3,3,3-pentafluoro-1-(5-methoxy-1*H*-indol-3-yl)-1-phenylpropan-1-ol (**1j**, 75 mg, 0.20 mmol) and 6-bromo-1*H*-indole (**2j**, 40 mg, 0.20 mmol) in acetonitrile (5 mL) in the presence of iodine (5 mg, 10 mol%). The product was isolated as light brown solid (98 mg, 89%). M.p: 94.9 °C.  $^1\text{H}$  NMR (600 MHz, DMSO-*d*<sub>6</sub>)  $\delta$  [ppm] = 11.31 (d,  $^4J_{H,H}$  = 2.8 Hz, 1H, NH), 11.07 (d,  $^4J_{H,H}$  = 2.9 Hz, 1H, NH), 7.66 – 7.50 (m, 3H), 7.33 – 7.23 (m, 5H), 7.20 (d,  $^4J_{H,H}$  = 2.9 Hz, 1H), 6.90 – 6.78 (m, 2H), 6.65 (dd,  $^3J_{H,H}$  = 8.8 Hz,  $^4J_{H,H}$  = 2.4 Hz, 1H), 6.26 (d,  $^4J_{H,H}$  = 2.6 Hz, 1H), 3.40 (s, 3H, CH<sub>3</sub>).  $^{13}\text{C}$  NMR (151 MHz, DMSO-*d*<sub>6</sub>)  $\delta$  [ppm] = 152.4, 138.82 – 137.70 (m, 2C, CF<sub>2</sub>), 137.4, 131.5, 131.4, 129.6, 127.7 (2C, CH), 127.4, 127.4, 126.9, 126.6, 125.4, 123.1, 121.4, 120.71 – 119.87 (m, 1C, CF<sub>3</sub>), 114.2, 113.7, 112.1, 111.9, 110.8, 110.6, 103.7, 54.9, 54.60 (q,  $^2J_{C,F}$  = 21.2 Hz, 1C, C<sub>q</sub>).  $^{19}\text{F}$  NMR (565 MHz, DMSO-*d*<sub>6</sub>)  $\delta$  [ppm] = -75.11 (s, 3F, CF<sub>3</sub>), -100.18 – -107.51 (m, 2F, CF<sub>2</sub>). LC-MS: positive [*m/z*] = 551.1 ([M+H]<sup>+</sup>). Purity by HPLC-UV (254 nm) ESI-MS: 99%. HRMS (ESI-QTOF) calculated for C<sub>26</sub>H<sub>18</sub>BrF<sub>5</sub>N<sub>2</sub>O [M + H]<sup>+</sup>: 549.0601 found: 549.0600

**6-Fluoro-3-(2,2,3,3,3-pentafluoro-1-(5-methoxy-1*H*-indol-3-yl)-1-phenylpropyl)-1*H*-**

**indole (3aa):** The compound **3aa** was synthesized by the reaction of 2,2,3,3,3-pentafluoro-1-(5-methoxy-1*H*-indol-3-yl)-1-phenylpropan-1-ol (**1j**, 75 mg, 0.20 mmol) and 6-fluoro-1*H*-indole (**2e**, 27 mg, 0.20 mmol) in acetonitrile (5 mL) in the presence of iodine (5 mg, 10 mol%). The product was isolated as brown solid (88 mg, 90%). M.p: 203.5 °C. <sup>1</sup>H NMR (600 MHz, DMSO-*d*<sub>6</sub>) δ [ppm] = 11.24 (s, 1H, NH), 11.07 (s, 1H, NH), 7.60 (d, <sup>3</sup>*J*<sub>H,H</sub> = 7.8 Hz, 2H), 7.34 – 7.12 (m, 7H), 6.86 (dd, <sup>3</sup>*J*<sub>H,H</sub> = 9.0 Hz, <sup>4</sup>*J*<sub>H,H</sub> = 5.5 Hz, 1H), 6.69 – 6.56 (m, 2H), 6.28 (d, <sup>4</sup>*J*<sub>H,H</sub> = 2.5 Hz, 1H), 3.40 (s, 3H). <sup>13</sup>C NMR (151 MHz, DMSO-*d*<sub>6</sub>) δ [ppm] = 158.31 (d, <sup>1</sup>*J*<sub>C,F</sub> = 235.3 Hz, 1C, CF<sub>arom</sub>), 152.4, 136.4, 136.3, 131.5, 129.7, 127.6 (2C, CH), 127.4, 127.1, 126.9, 126.7, 123.1, 122.41 (d, <sup>3</sup>*J*<sub>C,F</sub> = 13.1 Hz, 1C<sub>q</sub>, C<sub>indole</sub>), 120.74 – 119.63 (m, 1C, CF<sub>3</sub>), 118.82 – 117.84 (m, 1C, CF<sub>2</sub>), 112.1, 111.8, 110.8, 110.6, 107.2, 107.0, 103.8, 97.5, 97.3, 54.9 (1C, CH<sub>3</sub>), 54.70 (d, <sup>2</sup>*J*<sub>C,F</sub> = 20.8 Hz, 1C, C<sub>q</sub>). <sup>19</sup>F NMR (565 MHz, DMSO-*d*<sub>6</sub>) δ [ppm] = -75.10 (s, 3F, CF<sub>3</sub>), -99.88 – -107.13 (m, 2F, CF<sub>2</sub>), -119.76 – -124.70 (m, 1F, F<sub>arom</sub>). LC-MS: positive [*m/z*] = 489.3 [M+H]<sup>+</sup>. Purity by HPLC-UV (254 nm) ESI-MS: 96%. HRMS (ESI-QTOF) calculated for C<sub>26</sub>H<sub>18</sub>F<sub>6</sub>N<sub>2</sub>O [M + H]<sup>+</sup>: 489.1402 found: 489.1403.

**4,5-Difluoro-3-(2,2,3,3,3-pentafluoro-1-(5-methoxy-1*H*-indol-3-yl)-1-phenylpropyl)-1*H*-**

**indole (3ab):** The compound **3ab** was synthesized by the reaction of 2,2,3,3,3-pentafluoro-1-(5-methoxy-1*H*-indol-3-yl)-1-phenylpropan-1-ol (**1j**, 75 mg, 0.40 mmol) and 4,5-difluoro-1*H*-indole (**2k**, 30 mg, 0.20 mmol) in acetonitrile (5 mL) in the presence of iodine (5 mg, 10 mol%). The product was isolated as colorless solid (87 mg, 86%). M.p: 94.1 °C. <sup>1</sup>H NMR (600 MHz, DMSO-*d*<sub>6</sub>) δ [ppm] = 11.38 (d, <sup>4</sup>*J*<sub>H,H</sub> = 3.0 Hz, 1H, NH), 11.11 (d, <sup>4</sup>*J*<sub>H,H</sub> = 2.9 Hz, 1H, NH), 7.59 (d, <sup>3</sup>*J*<sub>H,H</sub> = 7.8 Hz, 2H), 7.43 – 7.21 (m, 8H), 6.69 – 6.60 (m, 2H), 6.28 – 6.21 (m, 1H, OH), 3.40 (s, 3H, CH<sub>3</sub>). <sup>13</sup>C NMR (151 MHz, DMSO-*d*<sub>6</sub>) δ [ppm] = 152.4, 146.16 (dd, <sup>1</sup>*J*<sub>C,F</sub> = 238.5, 16.4 Hz, 1C, CF<sub>arom</sub>), 144.29 (dd, <sup>1</sup>*J*<sub>C,F</sub> = 233.6, 15.2 Hz, 1C, CF<sub>arom</sub>), 137.8, 131.6, 131.5, 129.7, 128.4, 127.8, 127.5, 126.9, 126.6, 121.8, 121.8, 120.70 – 117.66 (m, 2C, CF<sub>2</sub>CF<sub>3</sub>), 112.2, 112.0,

110.7, 110.6, 107.47 (d,  $^2J_{C,F} = 22.1$  Hz, 1C, CH<sub>arom</sub>), 103.6, 99.5, 99.4, 54.9 (1C, CH<sub>3</sub>), 54.63 (q,  $^2J_{C,F} = 20.5$  Hz, 1C, C<sub>q</sub>).  $^{19}\text{F}$  NMR (565 MHz, DMSO-*d*<sub>6</sub>)  $\delta$  [ppm] = -75.06 (s, 3F, CF<sub>3</sub>), -104.31 (m, 2F, CF<sub>2</sub>), -142.56 – -150.18 (m, 2F, F<sub>arom</sub>). LC-MS: positive [*m/z*] = 507.4 ([M+H]<sup>+</sup>), 354.1 ([M-4,5-difluoro-1*H*-indole+H]<sup>+</sup>) 360.1 ([M-5-methoxy-1*H*-indole+H]<sup>+</sup>). Purity by HPLC-UV (254 nm) ESI-MS:97%. HRMS (ESI-QTOF) calculated for C<sub>26</sub>H<sub>17</sub>F<sub>7</sub>N<sub>2</sub>O [M + H]<sup>+</sup>: 507.1307 found: 507.1301.

**5,6-Difluoro-3-(2,2,3,3,3-pentafluoro-1-(5-methoxy-1*H*-indol-3-yl)-1-phen-ylpropyl)-1*H*-indole (3ac):** The compound **3ac** was synthesized by the reaction of 2,2,3,3,3-pentafluoro-1-(5-methoxy-1*H*-indol-3-yl)-1-phenylpropan-1-ol (**1j**, 75 mg, 0.20 mmol) and 5,6-difluoro-1*H*-indole (**1n**, 32 mg, 0.20 mmol) in acetonitrile (5 mL) in the presence of iodine (5 mg, 10 mol%). The product was isolated as colorless solid (93 mg, 92%). M.p: 91.7 °C.  $^1\text{H}$  NMR (600 MHz, DMSO-*d*<sub>6</sub>)  $\delta$  [ppm] = 11.38 (d,  $^4J_{H,H} = 2.7$  Hz, 1H, NH), 11.10 (d,  $^4J_{H,H} = 2.9$  Hz, 1H, NH), 7.60 – 7.55 (m, 2H), 7.43 – 7.20 (m, 7H), 6.68 – 6.58 (m, 2H), 6.24 (d,  $^4J_{H,H} = 2.5$  Hz, 1H), 3.39 (s, 3H, CH<sub>3</sub>).  $^{13}\text{C}$  NMR (151 MHz, DMSO-*d*<sub>6</sub>)  $\delta$  [ppm] = 152.4, 146.14 (dd,  $^1J_{C,F} = 238.6$  Hz,  $^2J_{C,F} = 16.1$  Hz, 1C, CF<sub>arom</sub>), 144.27 (dd,  $^1J_{C,F} = 233.9$  Hz,  $^1J_{C,F} = 14.9$  Hz, 1C, CF<sub>arom</sub>), 138.00 – 137.65 (m, 1C, CF<sub>3</sub>), 131.6, 131.6, 131.5, 129.6, 128.4, 127.8 (2C, CH<sub>arom</sub>), 127.6, 126.9, 126.6, 121.8, 121.8, 120.48 – 119.43 (m, 1C, CF<sub>2</sub>), 112.0, 110.5, 107.5, 107.3, 103.6, 99.5, 99.4, 54.9, 54.68 (q,  $^2J_{C,F} = 21.6$  Hz, 1C, C<sub>q</sub>).  $^{19}\text{F}$  NMR (565 MHz, DMSO-*d*<sub>6</sub>)  $\delta$  [ppm] = -75.05 (s, 3F, CF<sub>3</sub>), -100.18 – -110.42 (m, 2F, CF<sub>2</sub>), -141.96 – -153.54 (m, 2F, F<sub>arom</sub>). LC-MS: positive [*m/z*] = 507.4 ([M+H]<sup>+</sup>), 354.1 ([M-5,6-difluoro-1*H*-indole+H]<sup>+</sup>) 360.0 ([M-5-methoxy-1*H*-indole+H]<sup>+</sup>). Purity by HPLC-UV (254 nm) ESI-MS: 99%. HRMS (ESI-QTOF) calculated for C<sub>26</sub>H<sub>17</sub>F<sub>7</sub>N<sub>2</sub>O [M + H]<sup>+</sup>: 507.1307 found: 507.1303.

**5-Methoxy-3-(2,2,3,3,3-pentafluoro-1-(1*H*-indol-3-yl)-1-phenylpropyl)-1*H*-indole (3ad):**

The compound **3ad** was synthesized by the reaction of 2,2,3,3,3-pentafluoro-1-(5-methoxy-1*H*-indol-3-yl)-1-phenylpropan-1-ol (**1j**, 75 mg, 0.20 mmol) and 1*H*-indole (**2a**, 23 mg, 0.20 mmol) in acetonitrile (5 mL) in the presence of iodine (5 mg, 10 mol%). The product was isolated as brown solid (88 mg, 94%). M.p: 118.1 °C. <sup>1</sup>H NMR (600 MHz, DMSO-*d*<sub>6</sub>) δ [ppm] = 11.19 (s, 1H, NH), 11.04 (s, 1H, NH), 7.64 – 7.59 (m, 2H, H<sub>arom</sub>), 7.36 (dd, <sup>3</sup>J<sub>H,H</sub> = 8.1 Hz, <sup>4</sup>J<sub>H,H</sub> = 1.1 Hz, 1H, H<sub>arom</sub>), 7.32 – 7.23 (m, 4H, H<sub>arom</sub>), 7.20 (dd, <sup>3</sup>J<sub>H,H</sub> = 10.8 Hz, <sup>2</sup>J<sub>H,H</sub> = 2.7 Hz, 2H), 7.02 – 6.91 (m, 2H), 6.73 (ddd, <sup>3</sup>J<sub>H,H</sub> = 8.1 Hz, <sup>2</sup>J<sub>H,H</sub> = 6.9 Hz, <sup>4</sup>J<sub>H,H</sub> = 1.1 Hz, 1H), 6.65 (dd, <sup>3</sup>J<sub>H,H</sub> = 8.8 Hz, <sup>3</sup>J<sub>H,H</sub> = 2.4 Hz, 1H), 6.32 – 6.27 (m, 1H), 3.39 (s, 3H, CH<sub>3</sub>). <sup>13</sup>C NMR (151 MHz, DMSO-*d*<sub>6</sub>) δ [ppm] = 152.3, 139.2 (m, 1C, CF<sub>3</sub>), 136.4, 131.5, 129.7, 128.2 (m, 1C, CF<sub>2</sub>), 127.5 (2C, CH), 127.2 (3C, CH), 126.9, 126.7, 126.4, 126.3, 121.5, 120.8, 118.5, 112.0, 111.6, 111.5, 111.1, 110.5, 103.9, 54.9 (1C, CH<sub>3</sub>), 54.83 (m, C<sub>q</sub>). <sup>19</sup>F NMR (565 MHz, DMSO-*d*<sub>6</sub>) δ [ppm] = -75.08 (s, 3F, CF<sub>3</sub>), -103.08 – -104.97 (m, 2F, CF<sub>2</sub>). LC-MS: positive [*m/z*] = 471.2 ([M+H]<sup>+</sup>), 354.0([M-1*H*-indole+H]<sup>+</sup>), 324.1 ([M-5-methoxy-1*H*-indole+H]<sup>+</sup>). Purity by HPLC-UV (254 nm) ESI-MS: 98%. HRMS (ESI-QTOF) calculated for C<sub>26</sub>H<sub>19</sub>F<sub>5</sub>N<sub>2</sub>O [M + H]<sup>+</sup>: 471.1496 found: 471.1491.

**3-(2,2,3,3,4,4,4-Heptafluoro-1-(1*H*-indol-3-yl)-1-phenylbutyl)-5-methoxy-1*H*-indole**

**(3ae):** The compound **3ae** was synthesized by the reaction of 2,2,3,3,4,4,4-heptafluoro-1-(4-fluorophenyl)-1-(6-methoxy-1*H*-indol-3-yl)-butan-1-ol (**1l**, 84 mg, 0.20 mmol) and 1*H*-indole (**2a**, 23 mg, 0.20 mmol) in acetonitrile (5 mL) in the presence of iodine (5 mg, 10 mol%). The product was isolated as light yellow solid (68 mg, 65%). M.p: 107.6 °C. <sup>1</sup>H NMR (600 MHz, DMSO-*d*<sub>6</sub>) δ [ppm] = 11.19 (d, <sup>4</sup>J<sub>H,H</sub> = 2.7 Hz, 1H), 11.05 (d, <sup>4</sup>J<sub>H,H</sub> = 2.8 Hz, 1H), 7.60 (d, <sup>3</sup>J<sub>H,H</sub> = 7.7 Hz, 2H), 7.37 (d, <sup>3</sup>J<sub>H,H</sub> = 8.1 Hz, 1H), 7.34 – 7.22 (m, 4H), 7.21 – 7.13 (m, 2H), 6.99 (t, <sup>3</sup>J<sub>H,H</sub> = 7.5 Hz, 1H), 6.91 (d, <sup>3</sup>J<sub>H,H</sub> = 8.2 Hz, 1H), 6.73 (t, <sup>3</sup>J<sub>H,H</sub> = 7.6 Hz, 1H), 6.65 (dd, <sup>4</sup>J<sub>H,H</sub> = 8.8 Hz, <sup>4</sup>J<sub>H,H</sub> = 2.4 Hz, 1H), 6.25 (d, <sup>4</sup>J<sub>H,H</sub> = 2.7 Hz, 1H), 3.38 (s, 3H, CH<sub>3</sub>). <sup>13</sup>C NMR (151

MHz, DMSO-*d*<sub>6</sub>)  $\delta$  [ppm] = 152.3, 136.4, 131.5, 129.9 (2C, CH), 127.5, 127.3 (2C, CH), 126.8 (2C, CH), 126.4, 126.4, 121.4, 121.16 (m, 1C, CF<sub>3</sub>), 120.8, 119.30 (m, 1C, CF<sub>2</sub>), 118.69 (m, 1C, CF<sub>2</sub>), 118.5, 112.1, 111.6, 111.5, 111.0, 110.5, 103.8, 55.80 (q, <sup>2</sup>*J*<sub>C,F</sub> = 22.1 Hz, 1C, C<sub>q</sub>), 54.9. <sup>19</sup>F NMR (565 MHz, DMSO-*d*<sub>6</sub>)  $\delta$  [ppm] = -75.37 – -87.25 (m, 3F, CF<sub>3</sub>), -97.19 – -105.79 (m, 2F, CF<sub>2</sub>), -118.50 (m, 2F, CF<sub>2</sub>). LC-MS: positive [*m/z*] = 521.2 ([M+H]<sup>+</sup>). Purity by HPLC-UV (254 nm) ESI-MS: 97%. HRMS (ESI-QTOF) calculated for C<sub>27</sub>H<sub>19</sub>F<sub>7</sub>N<sub>2</sub>O [M + H]<sup>+</sup>: 521.1464 found: 521.1460.

**5-Fluoro-3-(2,2,3,3,4,4,4-Heptafluoro-1-(5-methoxy-1*H*-indol-3-yl)-1-phenylbutyl)-1*H*-indole (3af):** The compound **3af** was synthesized by the reaction of 2,2,3,3,4,4,4-heptafluoro-1-(4-fluorophenyl)-1-(6-methoxy-1*H*-indol-3-yl)-butan-1-ol (**1l**, 84 mg, 0.20 mmol) and 5-fluoro-1*H*-indole (**1d**, 27 mg, 0.20 mmol) in acetonitrile (5 mL) in the presence of iodine (5 mg, 10 mol%). The product was isolated as colorless solid (77 mg, 72%). M.p: 90.9 °C. <sup>1</sup>H NMR (600 MHz, DMSO-*d*<sub>6</sub>)  $\delta$  [ppm] = 11.33 (s, 1H, NH), 11.09 (s, 1H, NH), 7.57 (d, <sup>3</sup>*J*<sub>H,H</sub> = 7.7 Hz, 2H), 7.38 (dd, <sup>3</sup>*J*<sub>H,H</sub> = 8.9 Hz, <sup>4</sup>*J*<sub>H,H</sub> = 4.8 Hz, 1H), 7.35 – 7.25 (m, 5H), 7.19 (s, 1H), 6.84 (td, <sup>3</sup>*J*<sub>H,H</sub> = 9.0 Hz, <sup>3</sup>*J*<sub>H,H</sub> = 2.5 Hz, 1H), 6.65 (dd, <sup>3</sup>*J*<sub>H,H</sub> = 8.8 Hz, <sup>3</sup>*J*<sub>H,H</sub> = 2.4 Hz, 1H), 6.53 – 6.42 (m, 1H), 6.22 (d, <sup>3</sup>*J*<sub>H,H</sub> = 15.2 Hz, 1H), 3.38 (s, 3H, CH<sub>3</sub>). <sup>13</sup>C NMR (151 MHz, DMSO-*d*<sub>6</sub>)  $\delta$  [ppm] = 156.29 (d, <sup>1</sup>*J*<sub>C,F</sub> = 230.8 Hz, 1C, CF<sub>arom</sub>), 152.6, 133.3, 131.7, 130.0, 128.6, 127.8 (2C, CH), 127.7, 126.9, 126.8, 121.25 (m, 2C, CF<sub>2</sub>), 119.49 (1C, CF<sub>3</sub>), 112.9, 112.8, 112.3, 111.8, 110.9, 110.8, 110.7, 109.5, 109.3, 106.0, 105.9, 103.8, 55.83 (q, <sup>2</sup>*J*<sub>C,F</sub> = 21.6 Hz, 1C, C<sub>q</sub>), 55.0 (1C, CH<sub>3</sub>). <sup>19</sup>F NMR (565 MHz, DMSO-*d*<sub>6</sub>)  $\delta$  [ppm] = -80.19 – -80.49 (m, 3F, CF<sub>3</sub>), -100.11 – -101.48 (m, 4F, CF<sub>2</sub>), -124.56 – -124.76 (m, 1F, F<sub>arom</sub>). LC-MS: positive [*m/z*] = 539.4 ([M+H]<sup>+</sup>). M.p: 90.9 °C. Purity by HPLC-UV (254 nm) ESI-MS: 97%. HRMS (ESI-QTOF) calculated for C<sub>27</sub>H<sub>18</sub>F<sub>8</sub>N<sub>2</sub>O [M + H]<sup>+</sup>: 539.1370 found: 539.1365.

**6-Fluoro-3-(2,2,3,3,4,4,4-heptafluoro-1-(5-methoxy-1*H*-indol-3-yl)-1-phen-ylbutyl)-1*H*-indole (3ag):** The compound **3ag** was synthesized by the reaction of 2,2,3,3,4,4,4-heptafluoro-1-(4-fluorophenyl)-1-(6-methoxy-1*H*-indol-3-yl)-butan-1-ol (**1l**, 84 mg, 0.20 mmol) and 6-fluoro-1*H*-indole (**1e**, 27 mg, 0.20 mmol) in acetonitrile (5 mL) in the presence of iodine (5 mg, 10 mol%). The product was isolated as colorless solid (77 mg, 70%). M.p: 124.1 °C. <sup>1</sup>H NMR (600 MHz, DMSO-*d*<sub>6</sub>)  $\delta$  [ppm] = 11.24 (s, 1H, NH), 11.07 (s, 1H, NH), 7.57 (d, <sup>3</sup>*J*<sub>H,H</sub> = 7.7 Hz, 2H), 7.36 – 7.10 (m, 7H), 6.89 – 6.79 (m, 1H), 6.69 – 6.56 (m, 2H), 6.22 (m, 1H), 3.38 (s, 3H, CH<sub>3</sub>). <sup>13</sup>C NMR (151 MHz, DMSO-*d*<sub>6</sub>)  $\delta$  [ppm] = 158.31 (q, <sup>1</sup>*J*<sub>C,F</sub> = 235.3 Hz, 1C, CF<sub>arom</sub>), 152.4, 136.4, 136.3, 131.5, 129.8, 127.6 (2C, CH), 127.4, 127.1, 126.8, 126.8, 123.2, 122.33 (q, <sup>3</sup>*J*<sub>C,F</sub> = 13.7 Hz, 1C, C<sub>q</sub>), 119.29 (m, 1C, CF<sub>3</sub>), 114.49 (m, 2C, CF<sub>2</sub>), 112.1, 111.8, 110.8, 110.5, 107.2, 107.1, 103.7, 97.5, 97.3, 55.71 (q, <sup>2</sup>*J*<sub>C,F</sub> = 21.9 Hz, 1C, C<sub>q</sub>), 54.9 (1C, CH<sub>3</sub>). <sup>19</sup>F NMR (565 MHz, DMSO-*d*<sub>6</sub>)  $\delta$  [ppm] = -80.28 – -80.42 (m, 3F, CF<sub>3</sub>), -100.15 – -101.40 (m, 4F, CF<sub>2</sub>), -122.36 (m, 1F, F<sub>arom</sub>). LC-MS: positive [*m/z*] = 539.5 ([M+H]<sup>+</sup>). Purity by HPLC-UV (254 nm) ESI-MS: 99%. HRMS (ESI-QTOF) calculated for C<sub>27</sub>H<sub>18</sub>F<sub>8</sub>N<sub>2</sub>O [M + H]<sup>+</sup>: 539.1370 found: 539.1367.

### Reaction of **1l** with **2c** or **2d**

To the solution of 1-(1*H*-indol-3-yl)-1-phenylethan-1-ol (**1l**, 0.2 mmol) and appropriate indole derivative (**2c** or **2d**, 0.2 mmol) in acetonitrile (5 mL), I<sub>2</sub> (0.1 eq., 10%) was added at rt. The mixture was heated to 40 °C for 12 h. The reaction was monitored by TLC with UV detection. The reaction was not initiated even after 12 h.

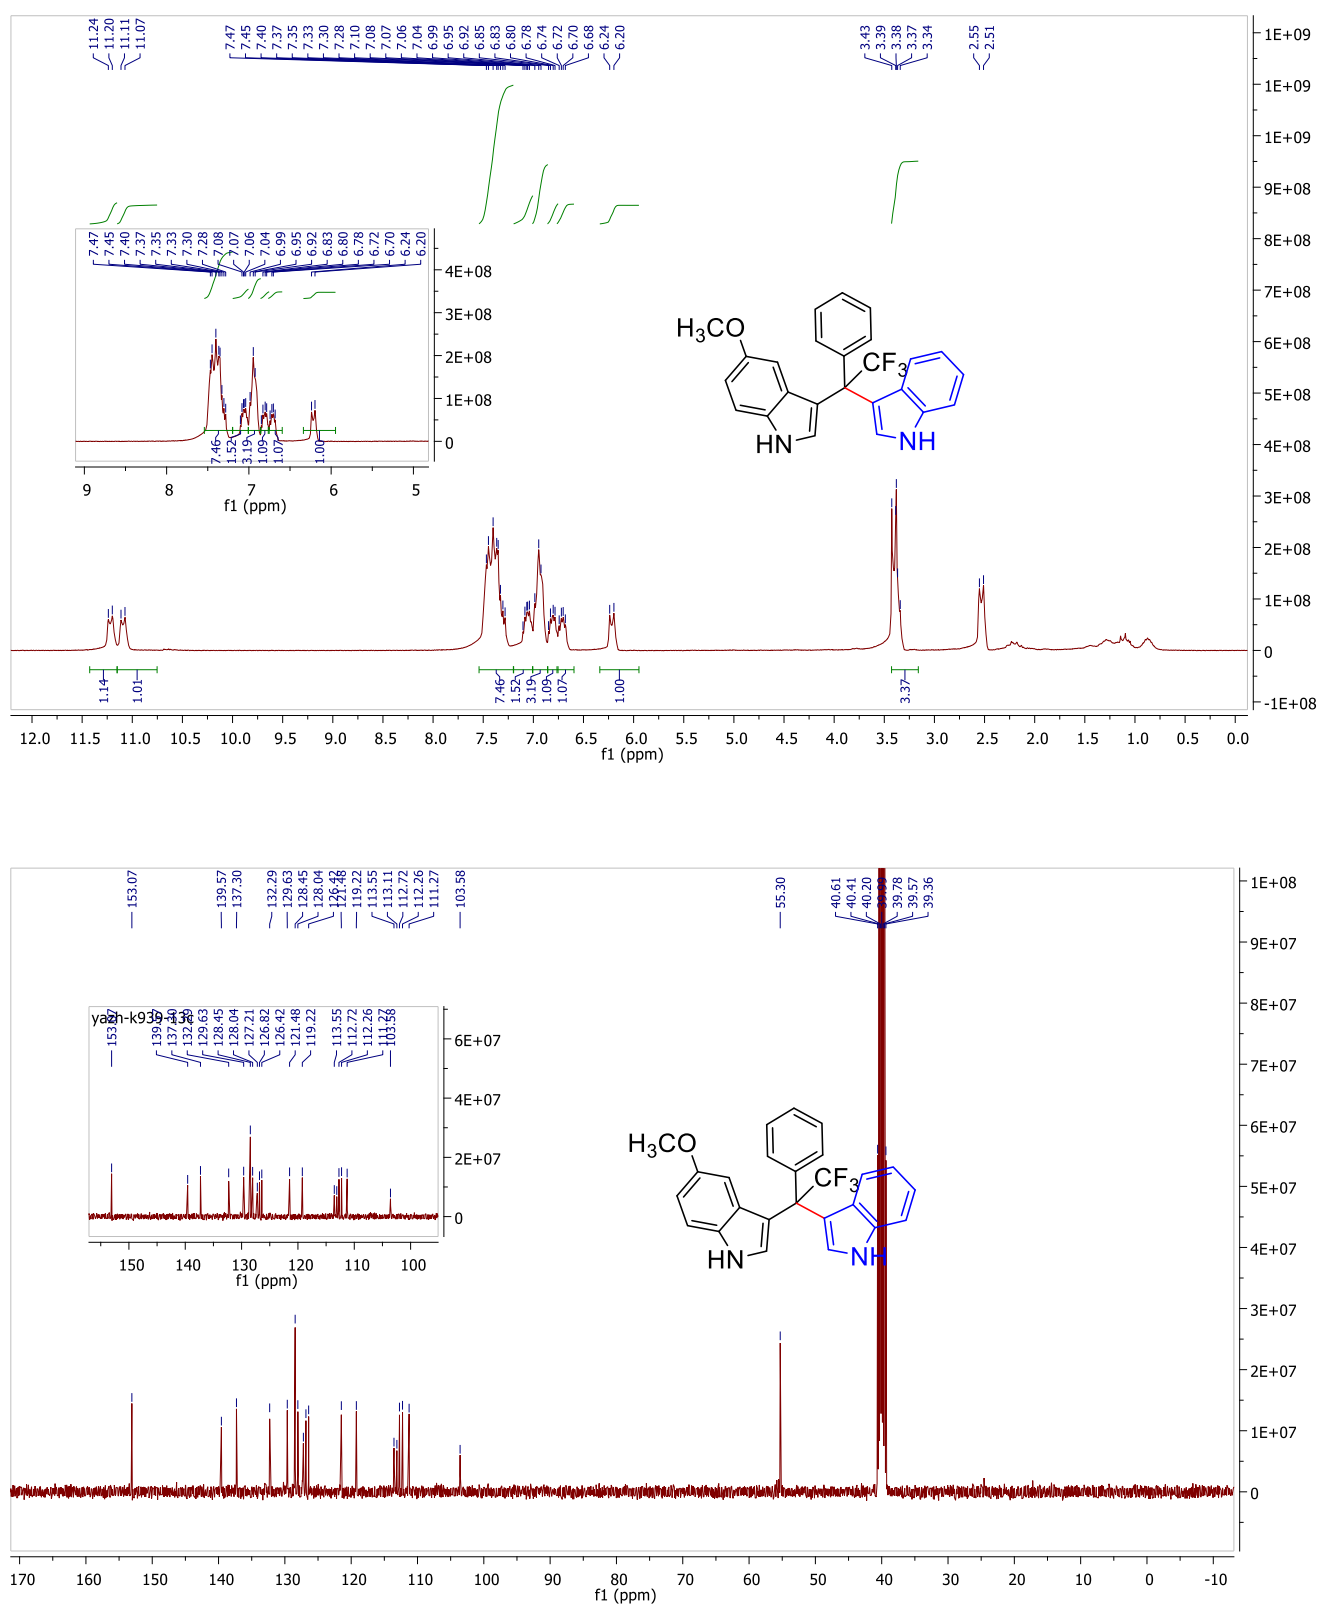

**Figure S4.** <sup>1</sup>H (400 MHz) and <sup>13</sup>C (151 MHz) Spectra of 5-methoxy-3-(2,2,2-trifluoro-1-(1*H*-indol-3-yl)-1-phenylethyl)-1*H*-indole (**3a**)



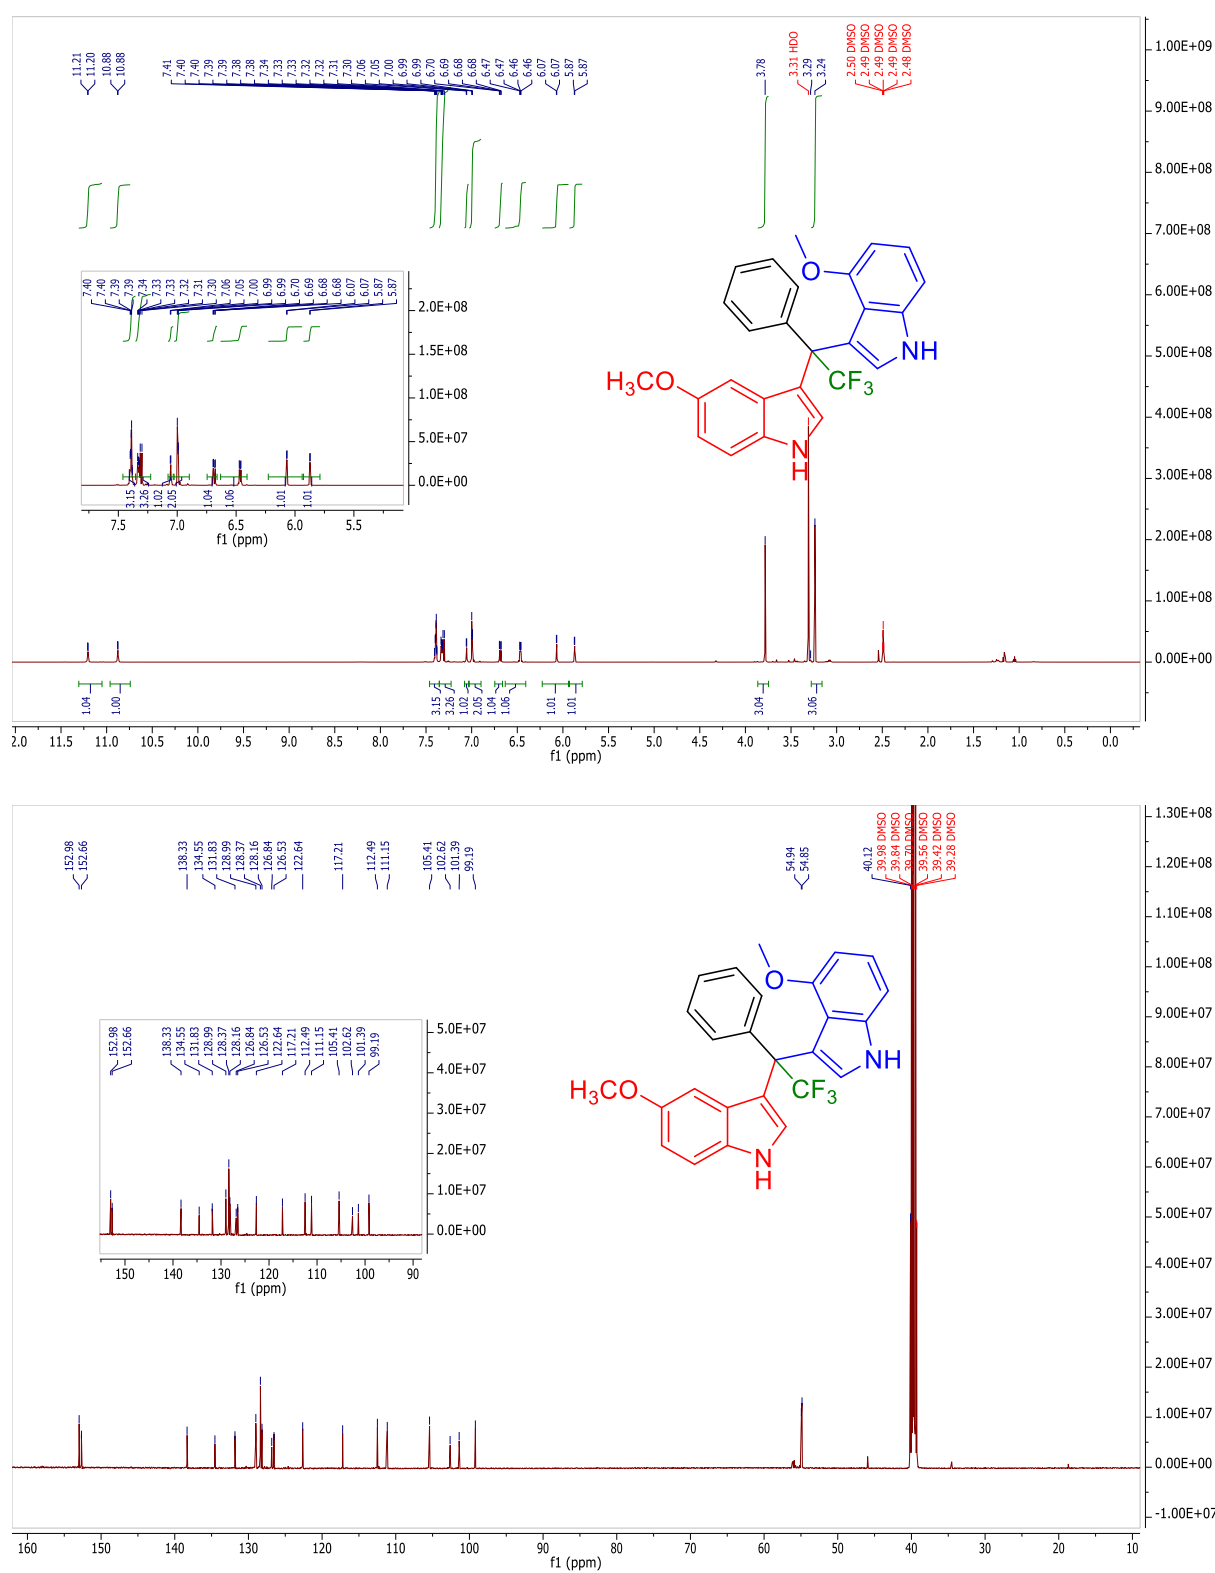

**Figure S5.** <sup>1</sup>H (600 MHz) and <sup>13</sup>C (151 MHz) Spectra of 5-methoxy-3-(2,2,2-trifluoro-1-(4-methoxy-1*H*-indol-3-yl)-1-phenylethyl)-1*H*-indole (**3b**)

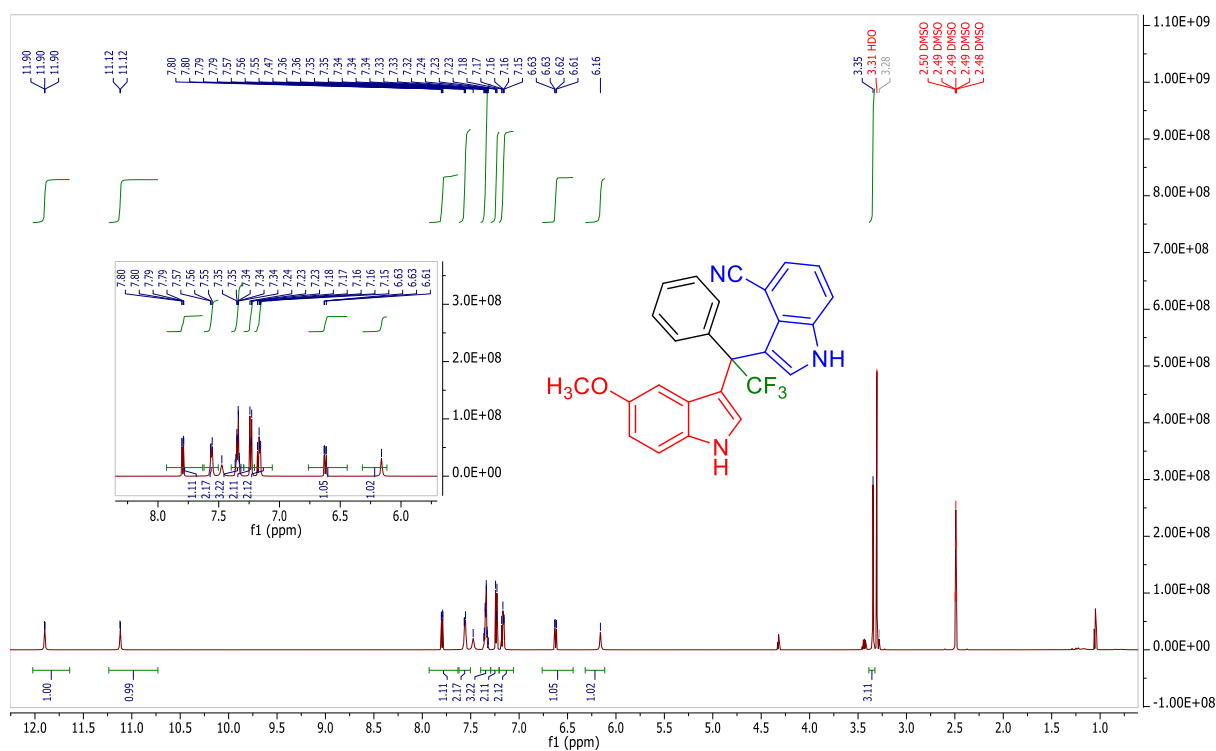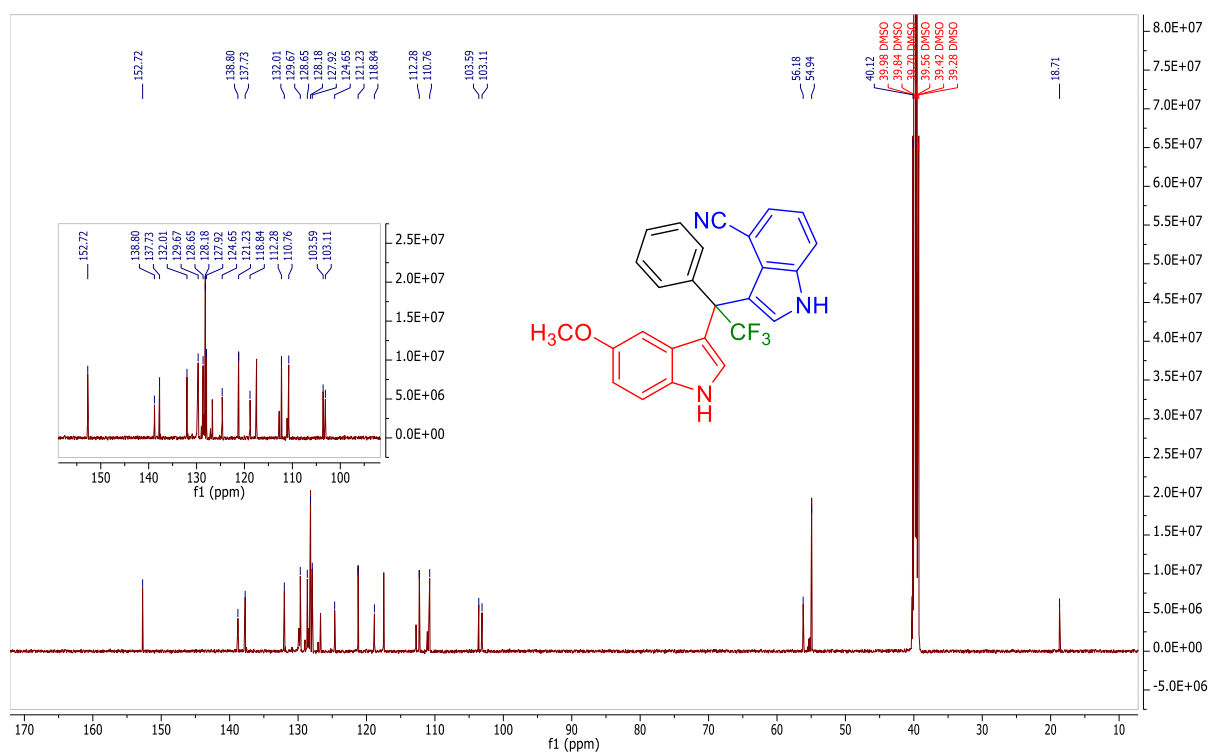

**Figure S6.**  $^1\text{H}$  (600 MHz) and  $^{13}\text{C}$  (151 MHz) Spectra of 3-(2,2,2-trifluoro-1-(5-methoxy-1*H*-indol-3-yl)-1-phenylethyl)-1*H*-indole-4-carbonitrile (**3c**)

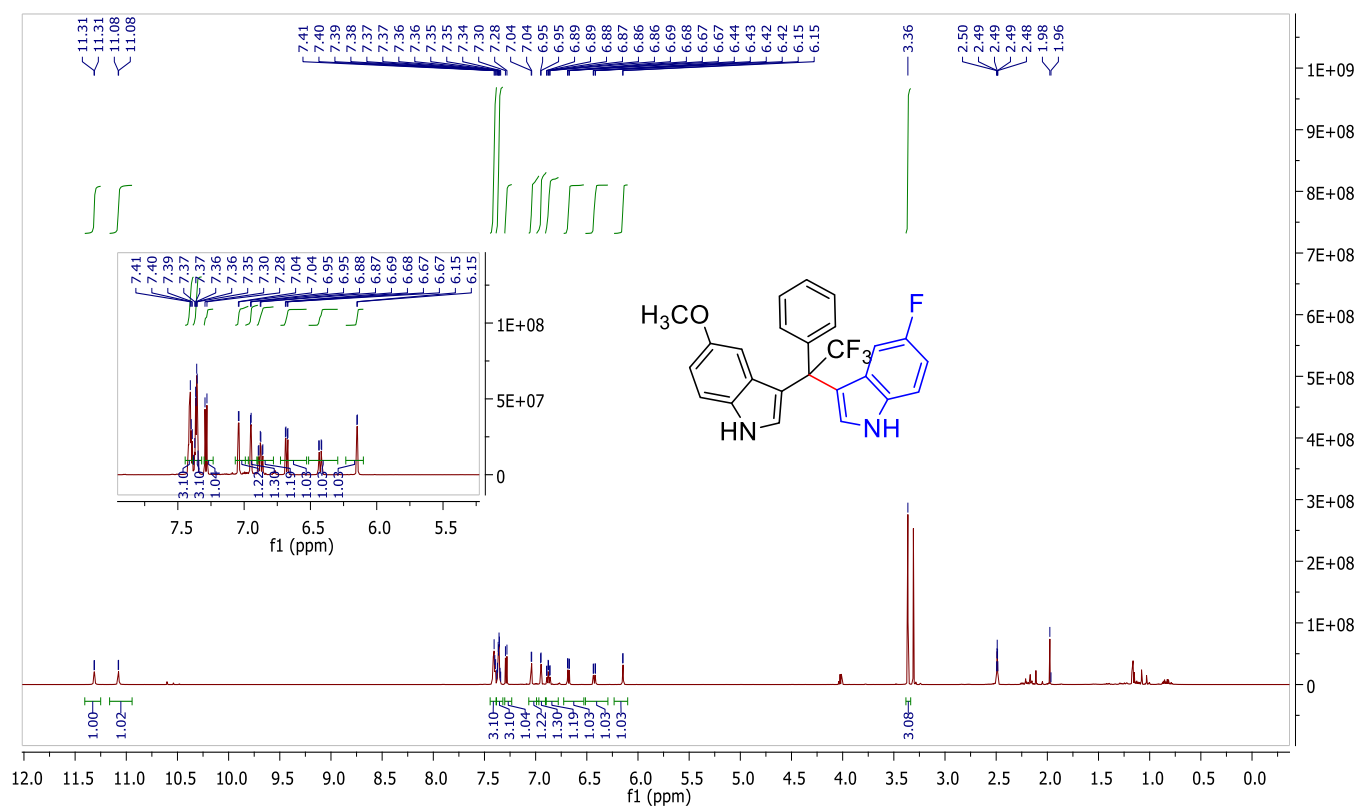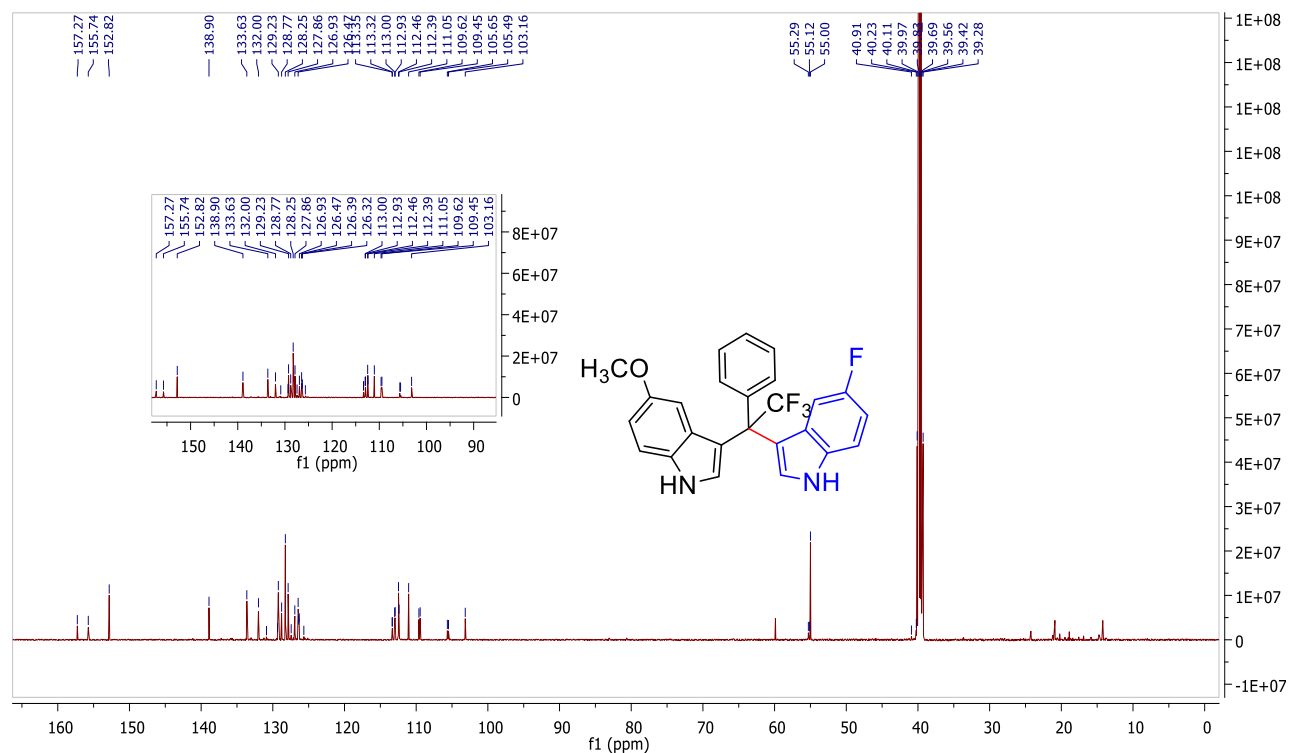

**Figure S7.** <sup>1</sup>H (600 MHz) and <sup>13</sup>C (151 MHz) Spectra of 5-fluoro-3-(2,2,2-trifluoro-1-(5-methoxy-1*H*-indol-3-yl)-1-phenylethyl)-1*H*-indole (**3d**)

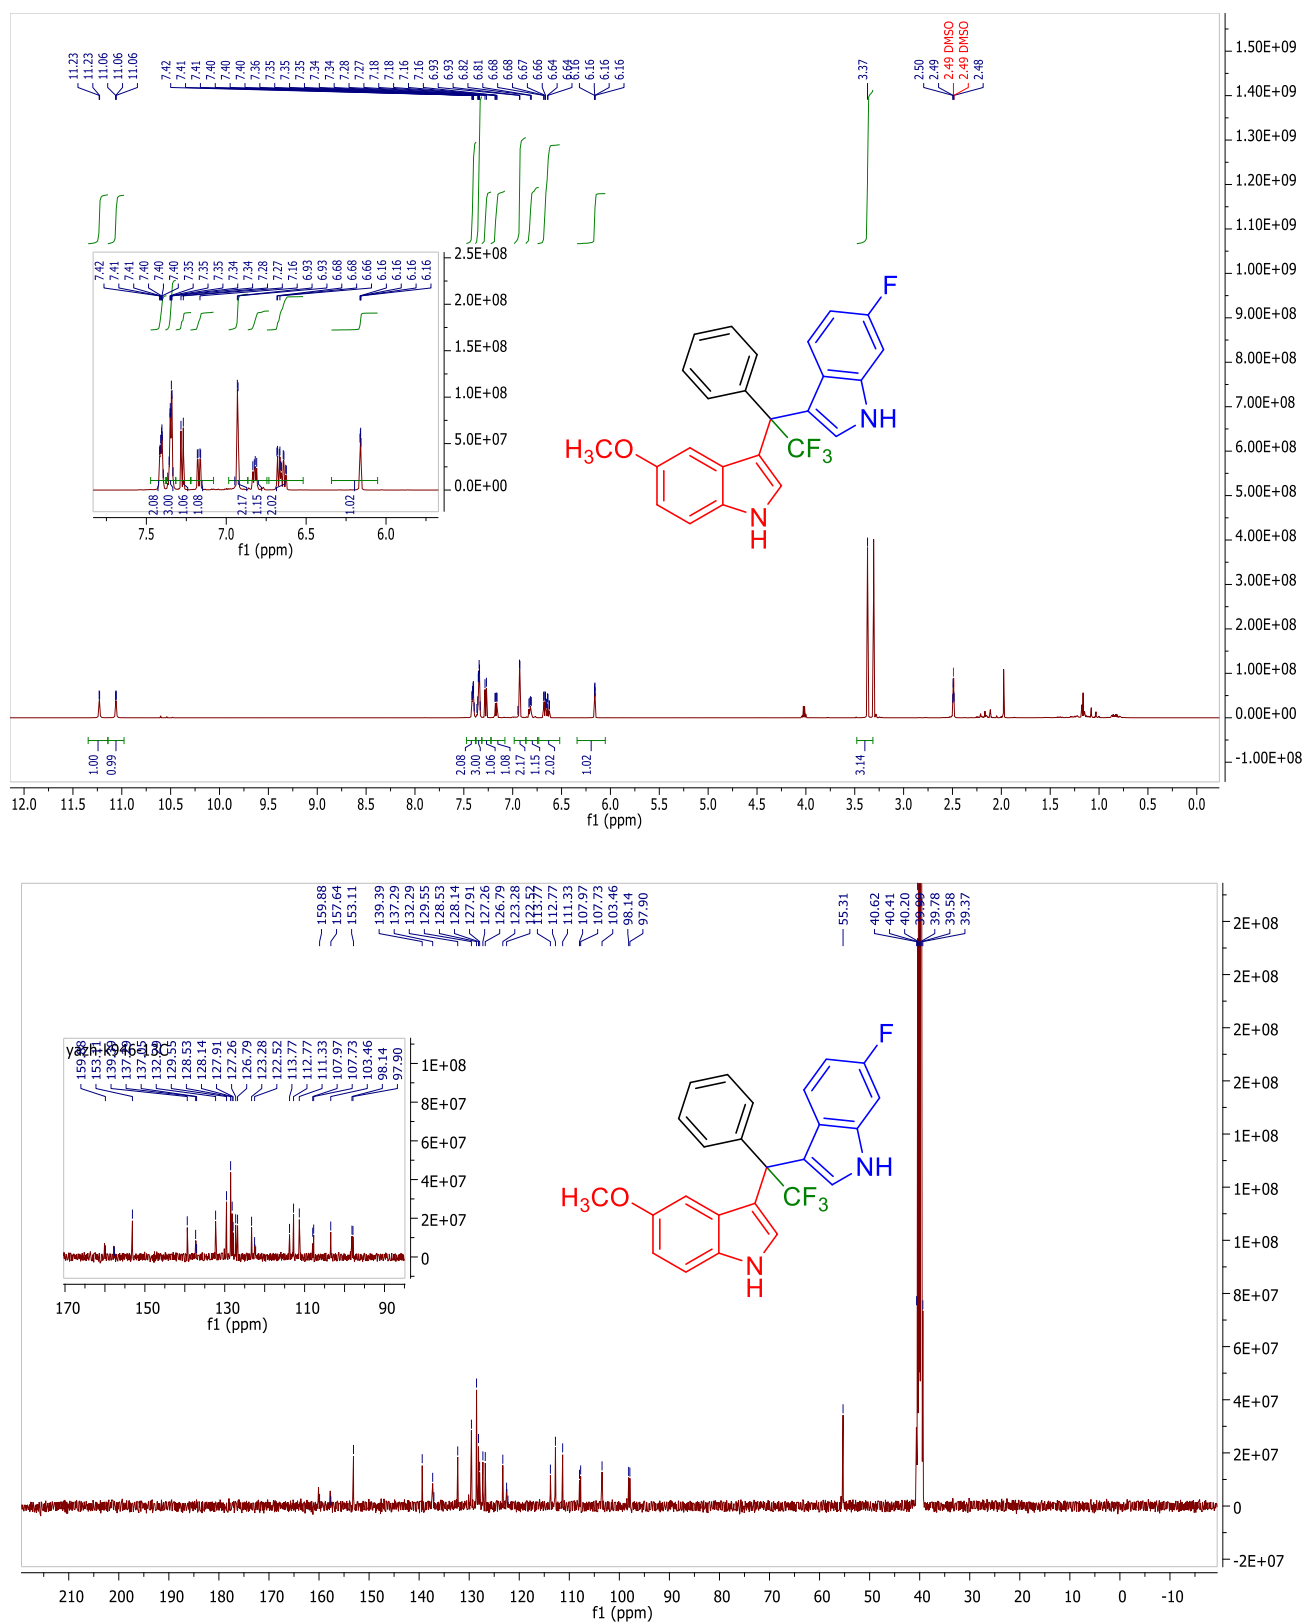

**Figure S8.** <sup>1</sup>H (600 MHz) and <sup>13</sup>C (151 MHz) Spectra of 6-fluoro-3-(2,2,2-trifluoro-1-(5-methoxy-1H-indol-3-yl)-1-phenylethyl)-1H-indole (**3e**)

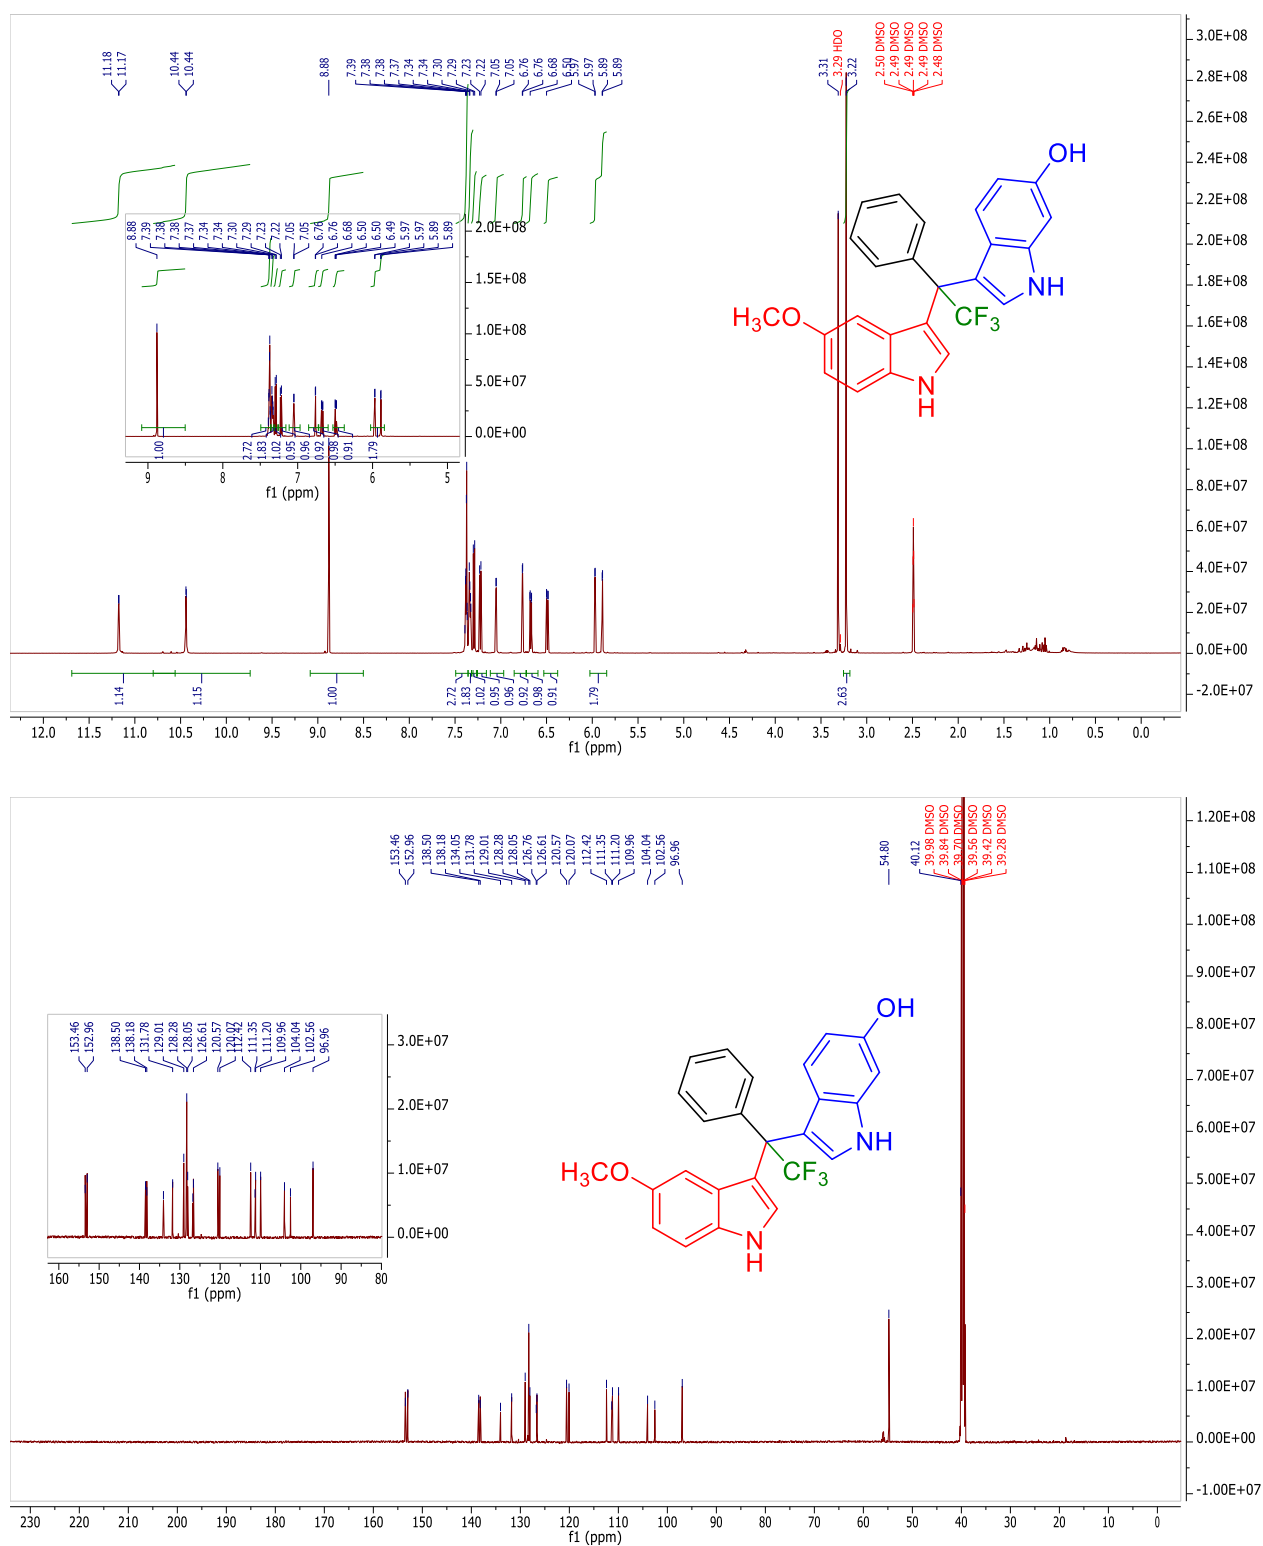

**Figure S9.** <sup>1</sup>H (600 MHz) and <sup>13</sup>C (151 MHz) Spectra of 3-(2,2,2-trifluoro-1-(5-methoxy-1*H*-indol-3-yl)-1-phenylethyl)-1*H*-indol-6-ol (**3f**)

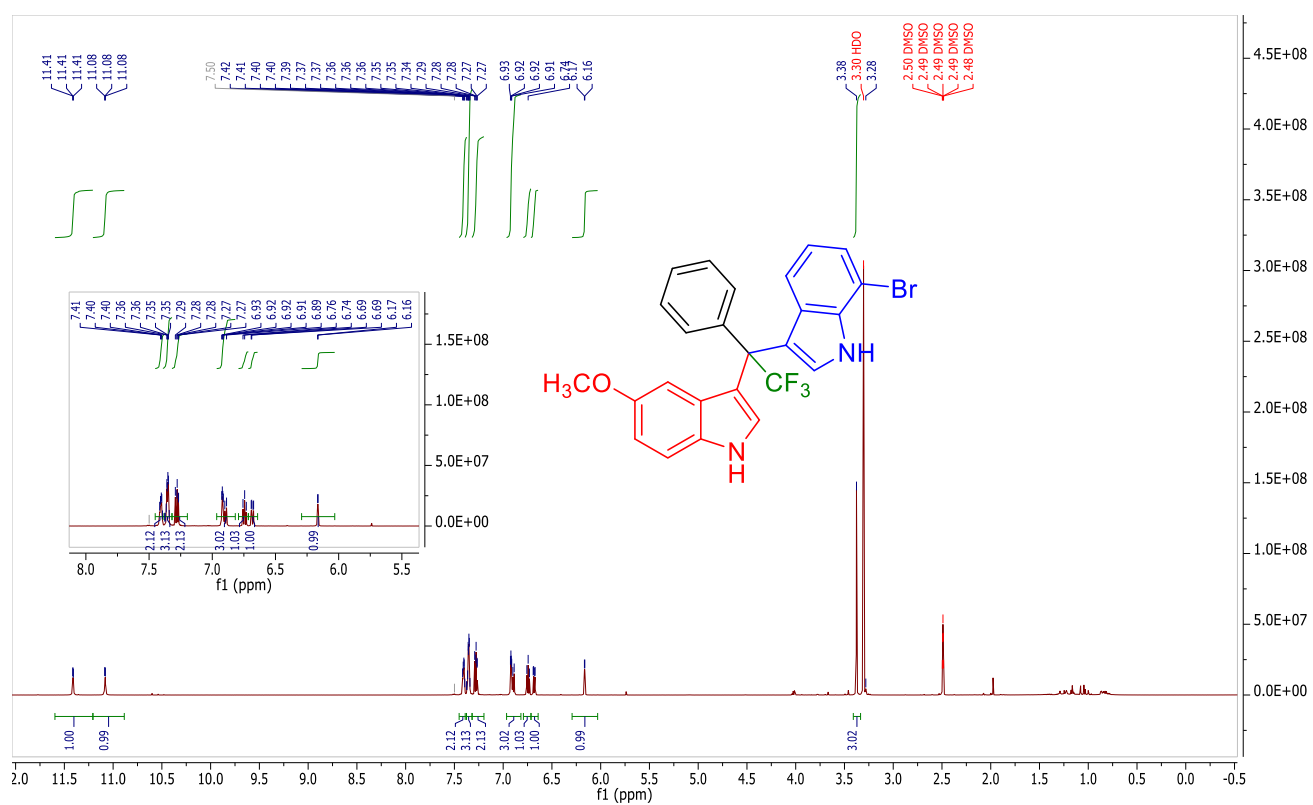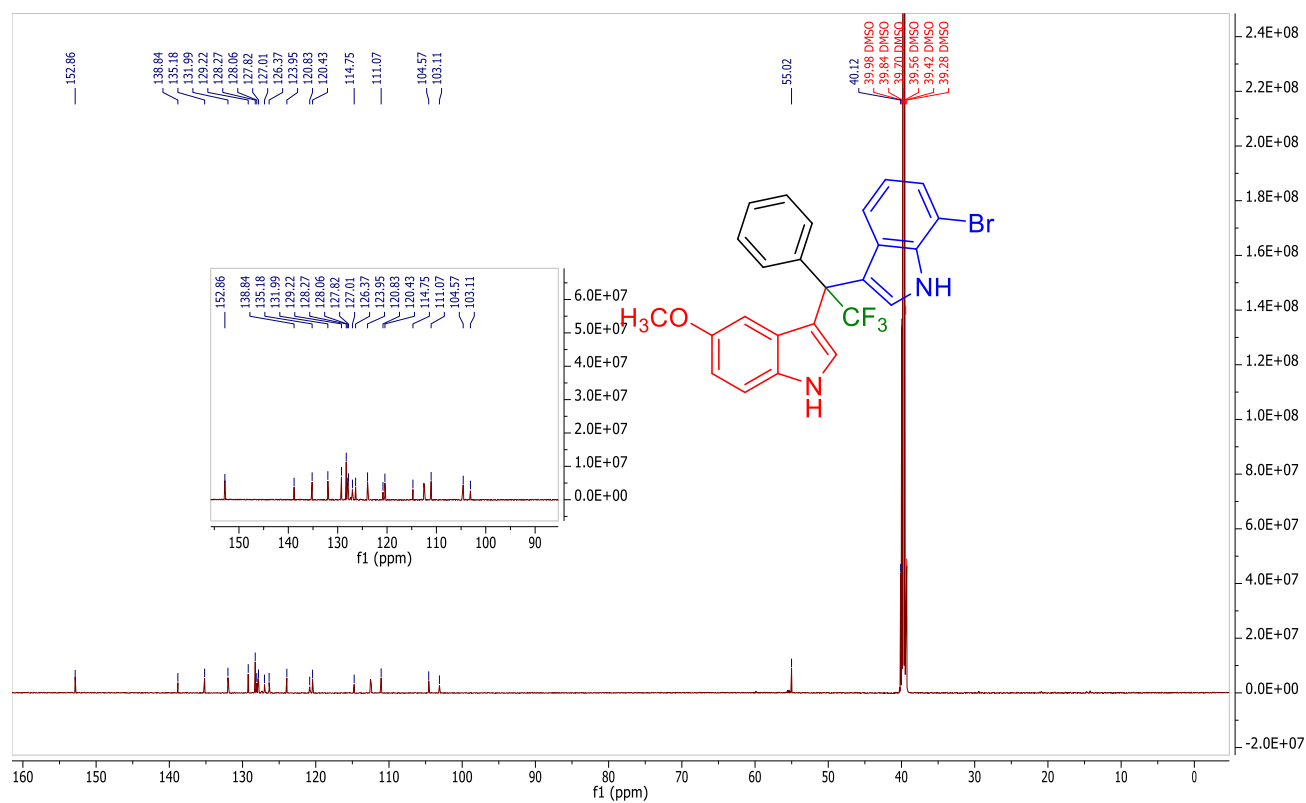

**Figure S10.** <sup>1</sup>H (600 MHz) and <sup>13</sup>C (151 MHz) Spectra of 7-bromo-3-(2,2,2-trifluoro-1-(5-methoxy-1H-indol-3-yl)-1-phenylethyl)-1H-indole (3g)

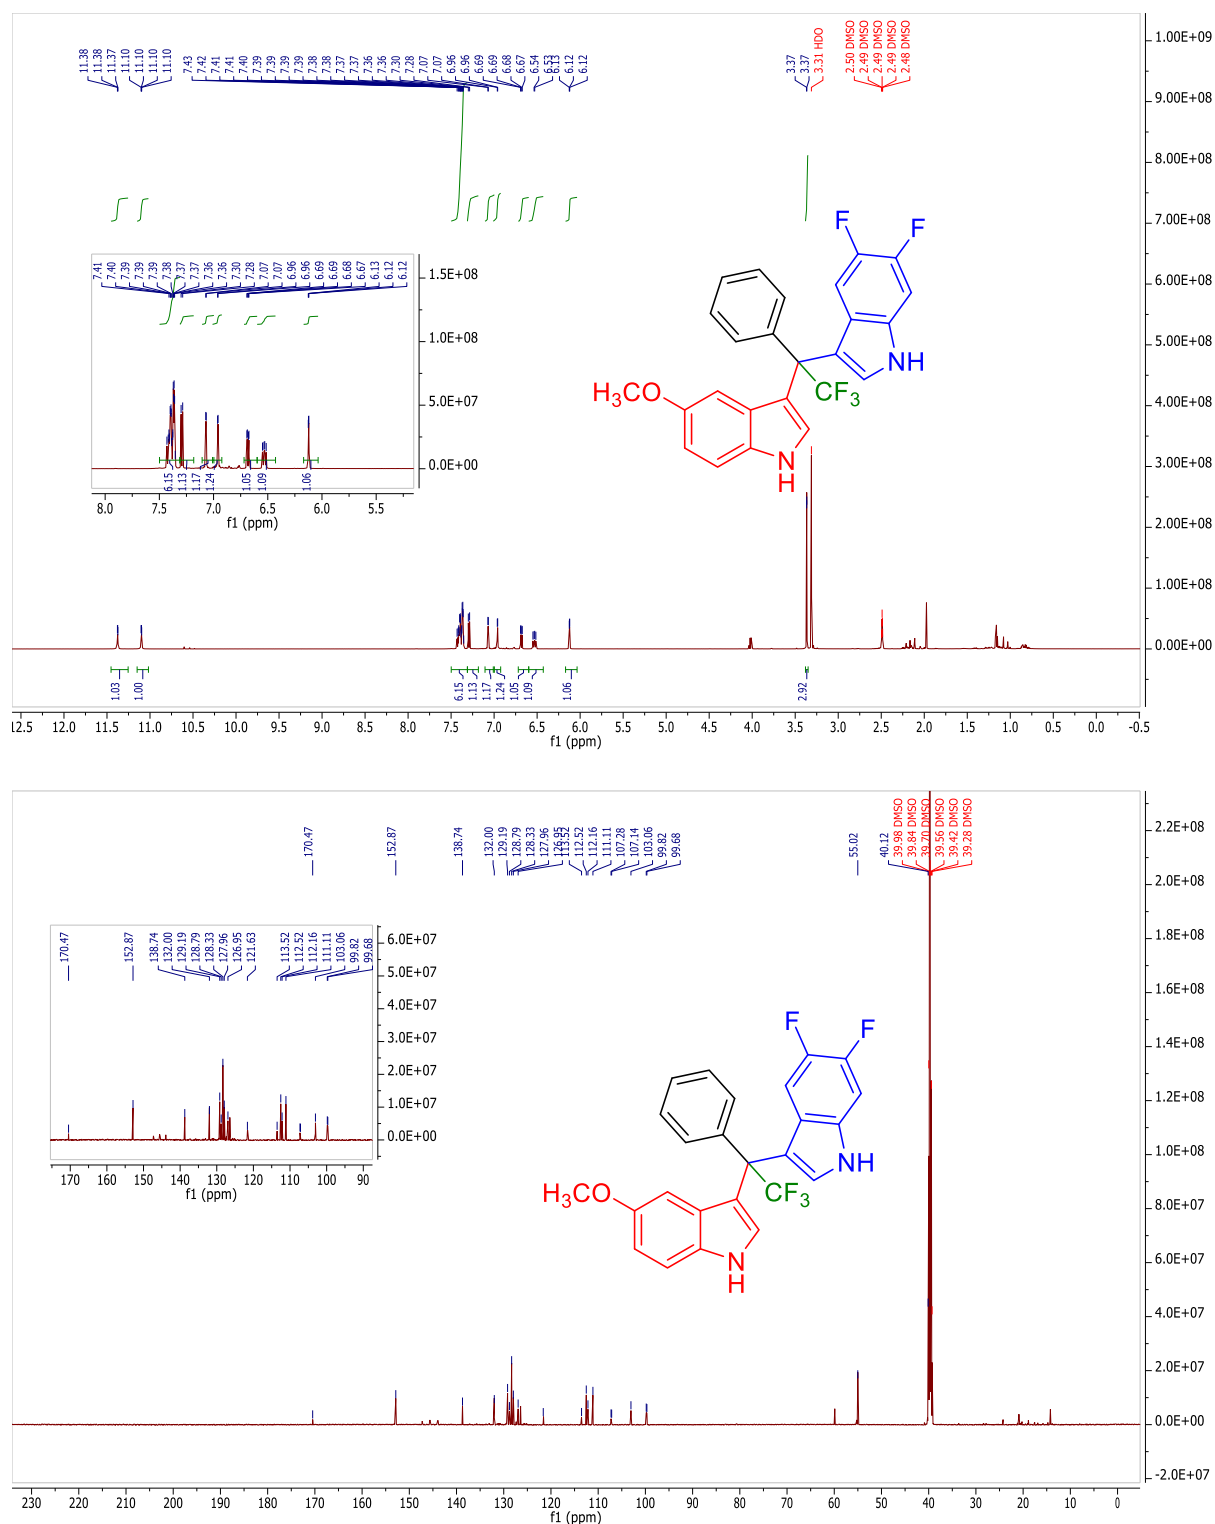

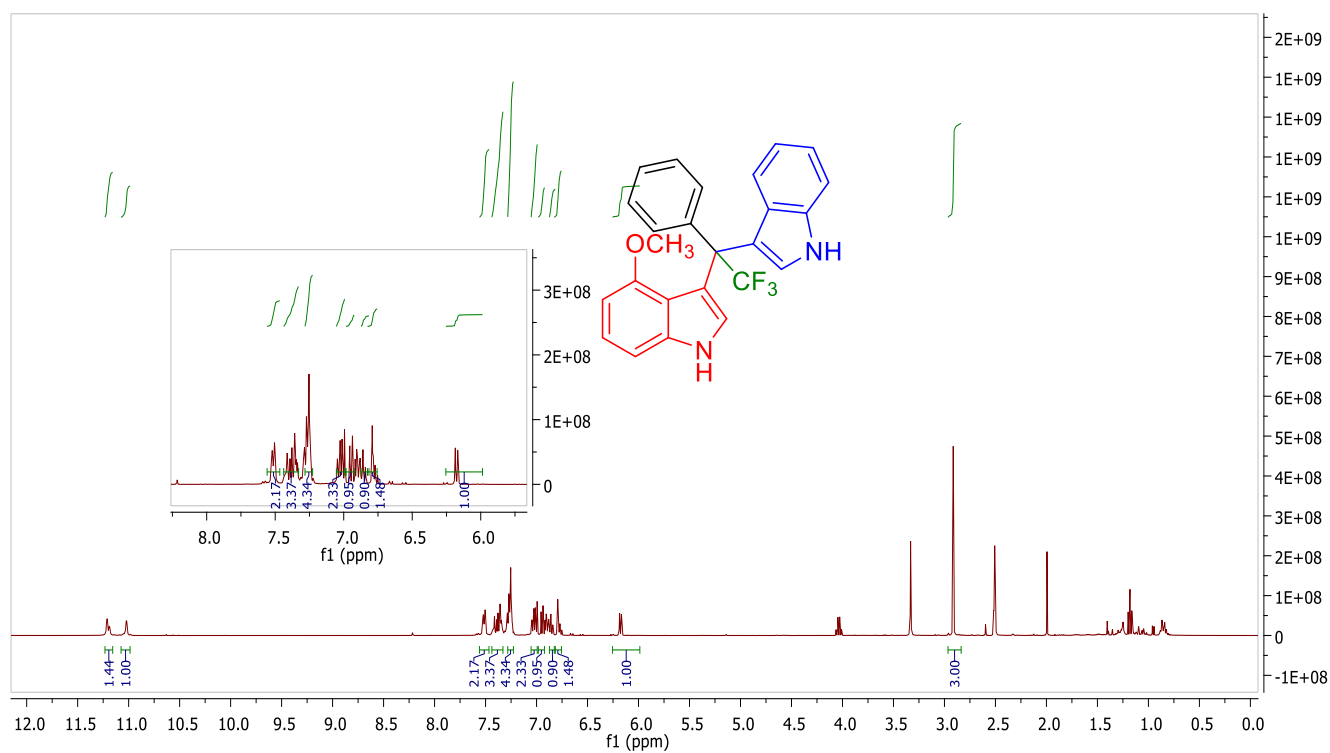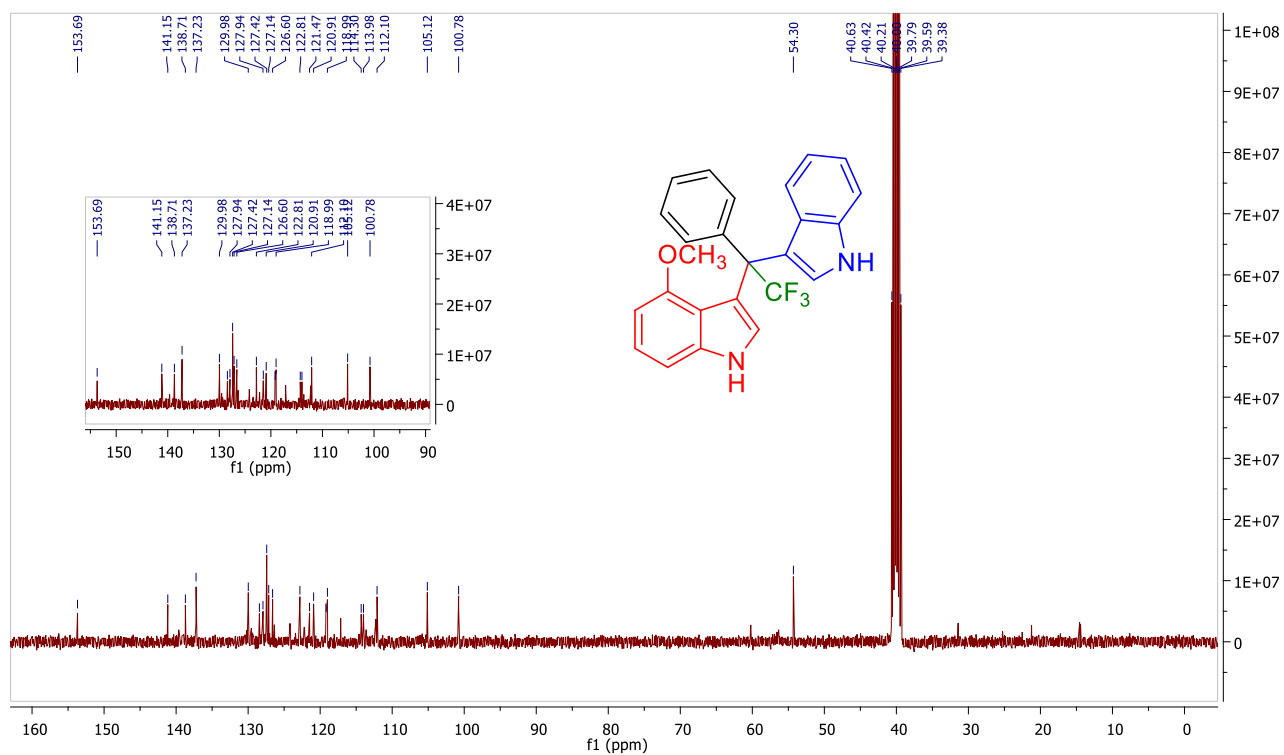

**Figure S12.** <sup>1</sup>H (600 MHz) and <sup>13</sup>C (151 MHz) Spectra of 4-methoxy-3-(2,2,2-trifluoro-1-(1*H*-indol-3-yl)-1-phenylethyl)-1*H*-indole (**3i**)



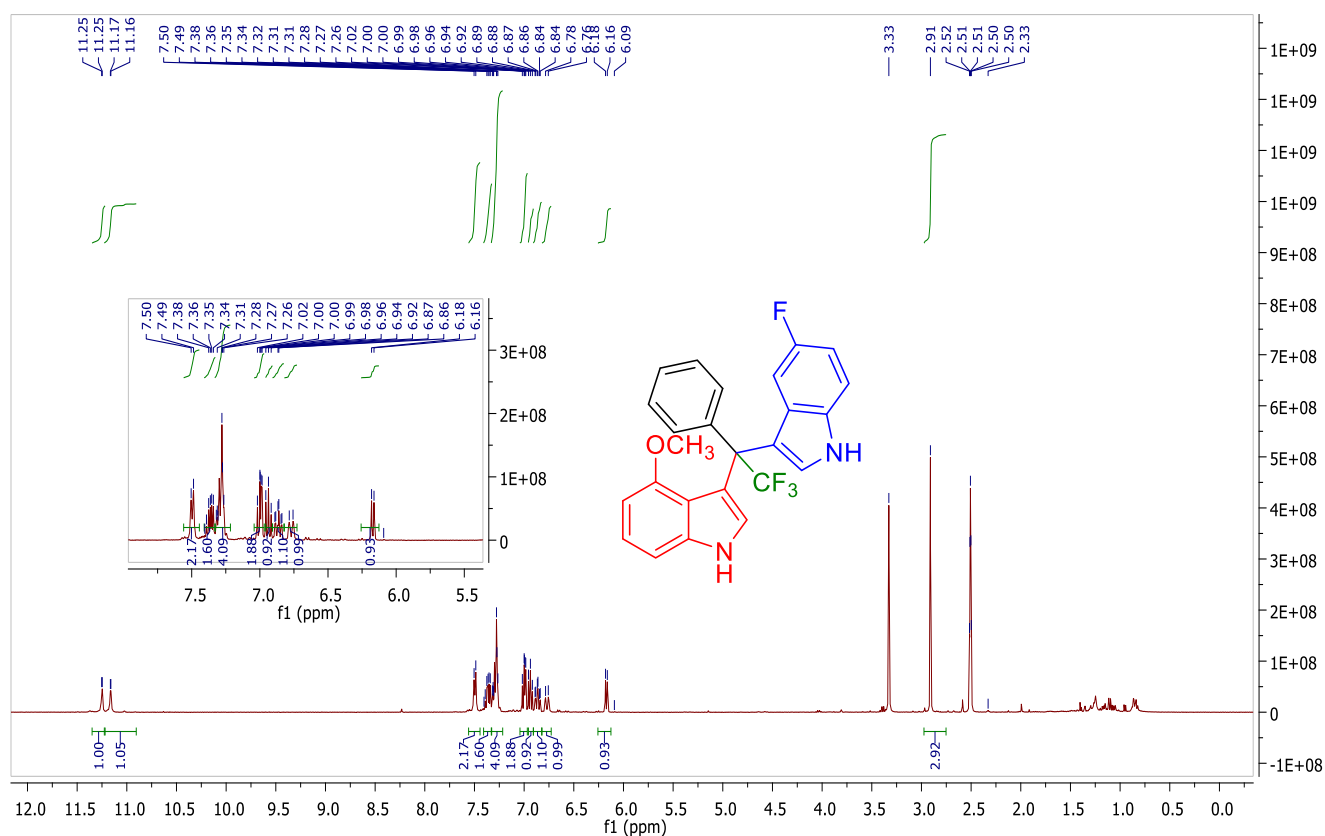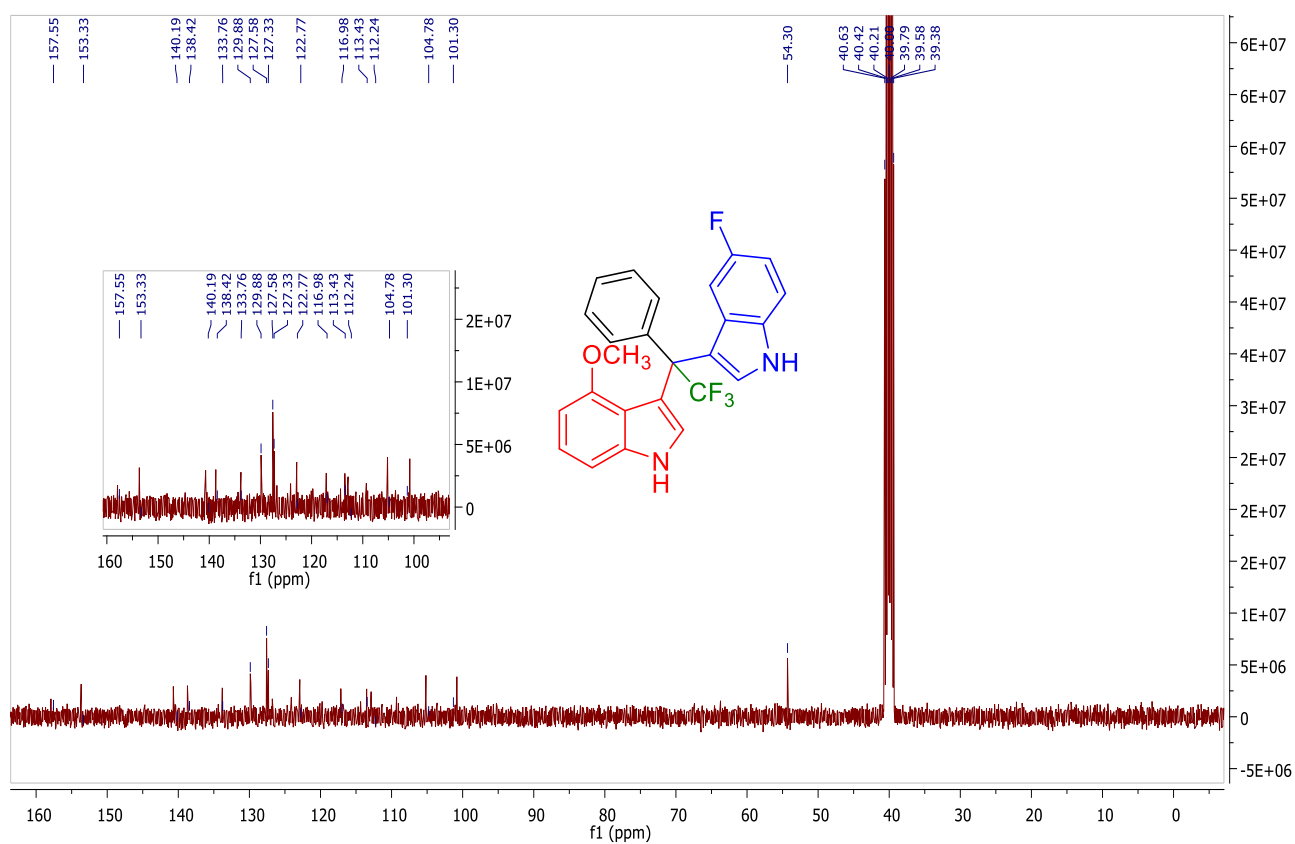

**Figure S13.**  $^1\text{H}$  (600 MHz) and  $^{13}\text{C}$  (151 MHz) Spectra of 5-fluoro-3-(2,2,2-trifluoro-1-(4-methoxy-1*H*-indol-3-yl)-1-phenylethyl)-1*H*-indole (**3j**)

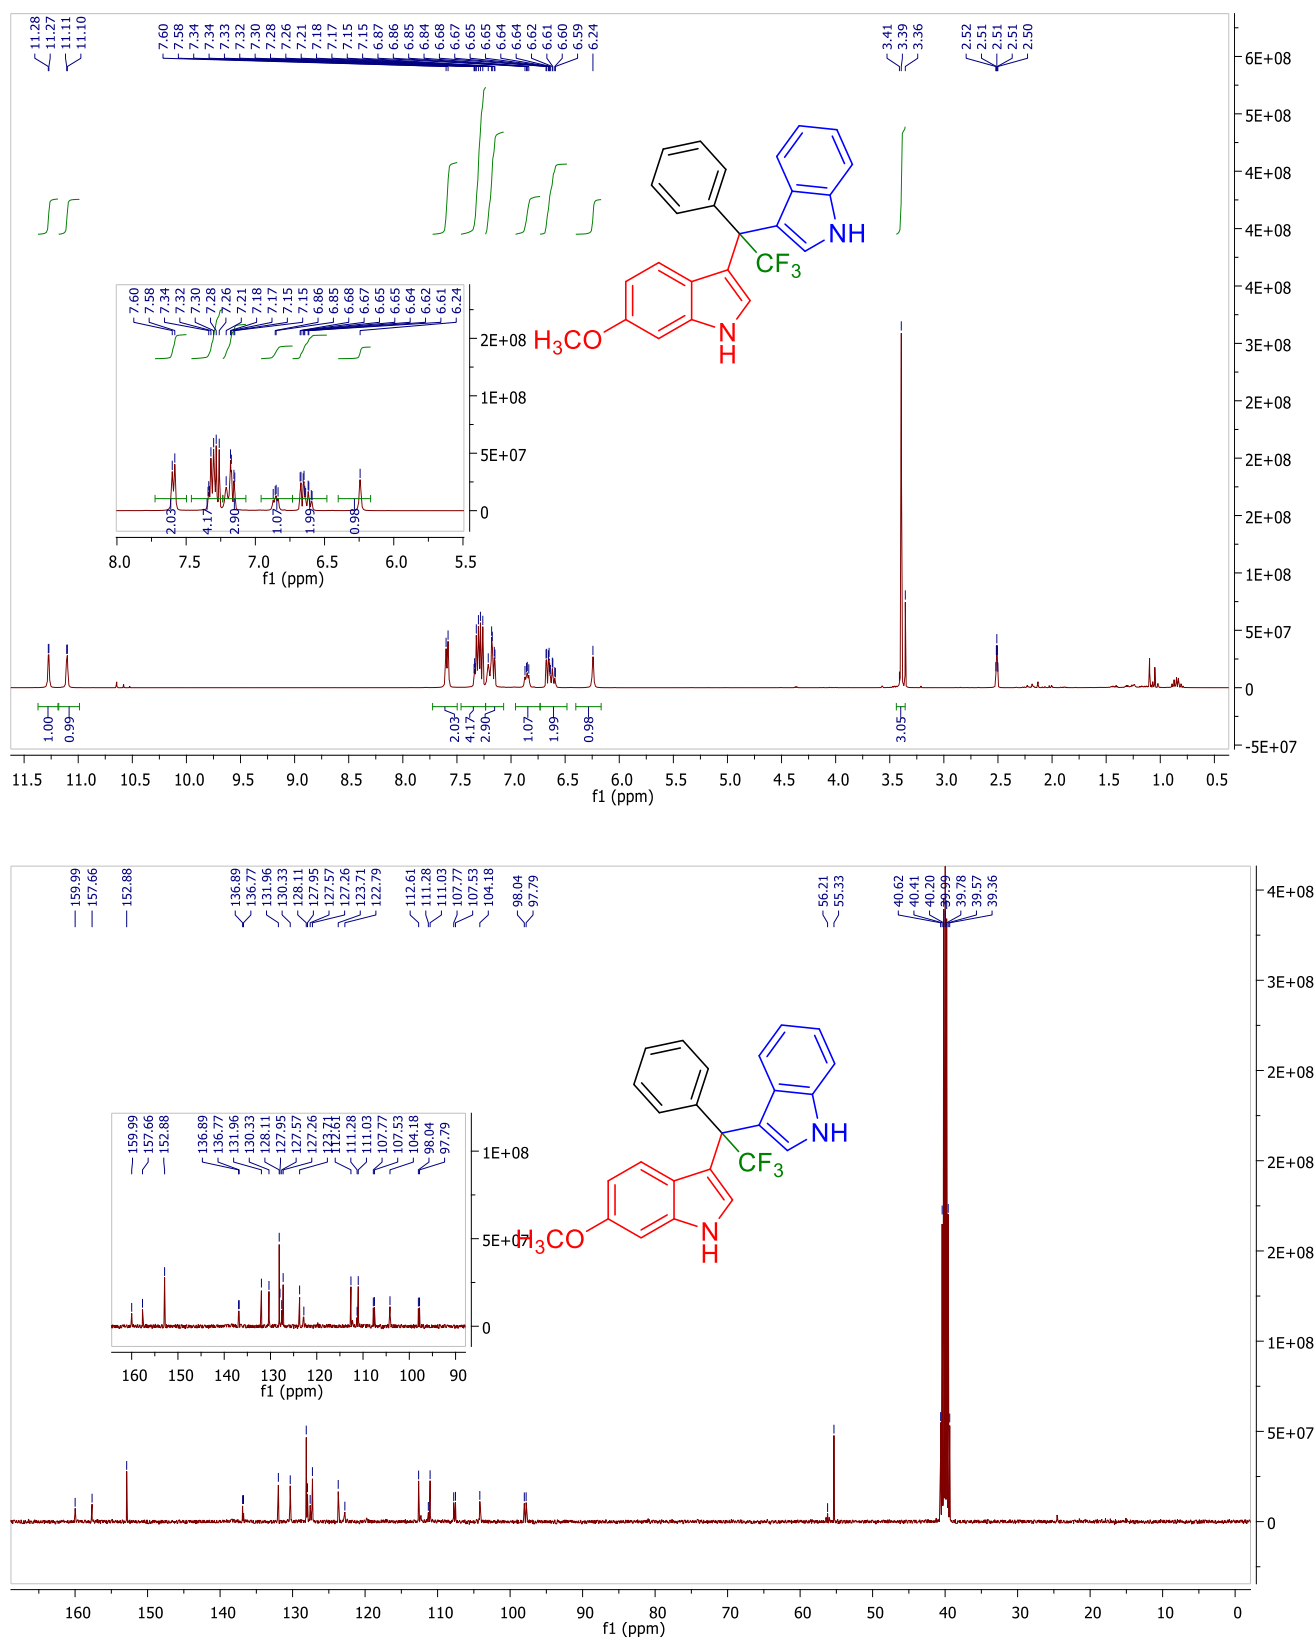

**Figure S14.** <sup>1</sup>H (600 MHz) and <sup>13</sup>C (151 MHz) Spectra of 6-methoxy-3-(2,2,2-trifluoro-1-(1*H*-indol-3-yl)-1-phenylethyl)-1*H*-indole (**3k**)

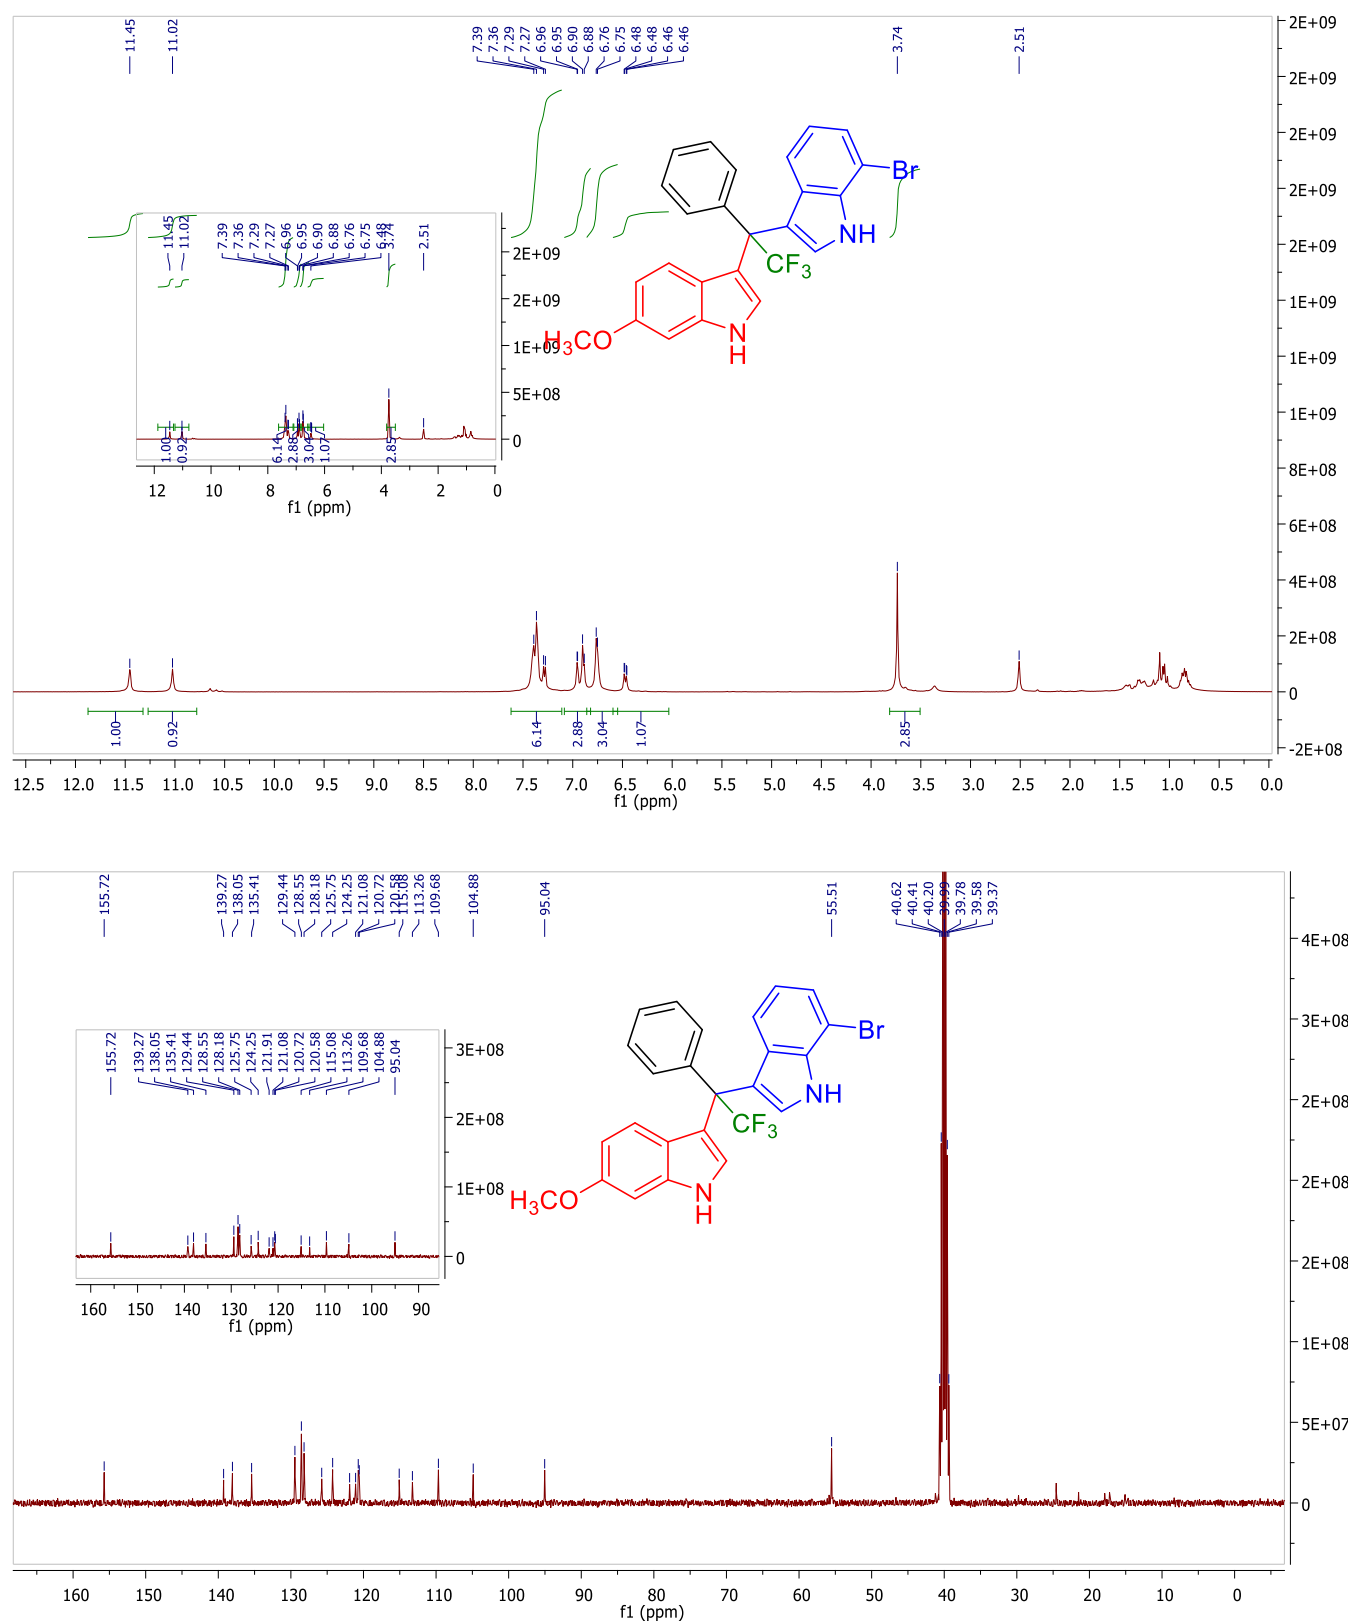

**Figure S15.** <sup>1</sup>H (600 MHz) and <sup>13</sup>C (151 MHz) Spectra of 7-bromo-3-(2,2,2-trifluoro-1-(6-methoxy-1H-indol-3-yl)-1-phenylethyl)-1H-indole (**31**)

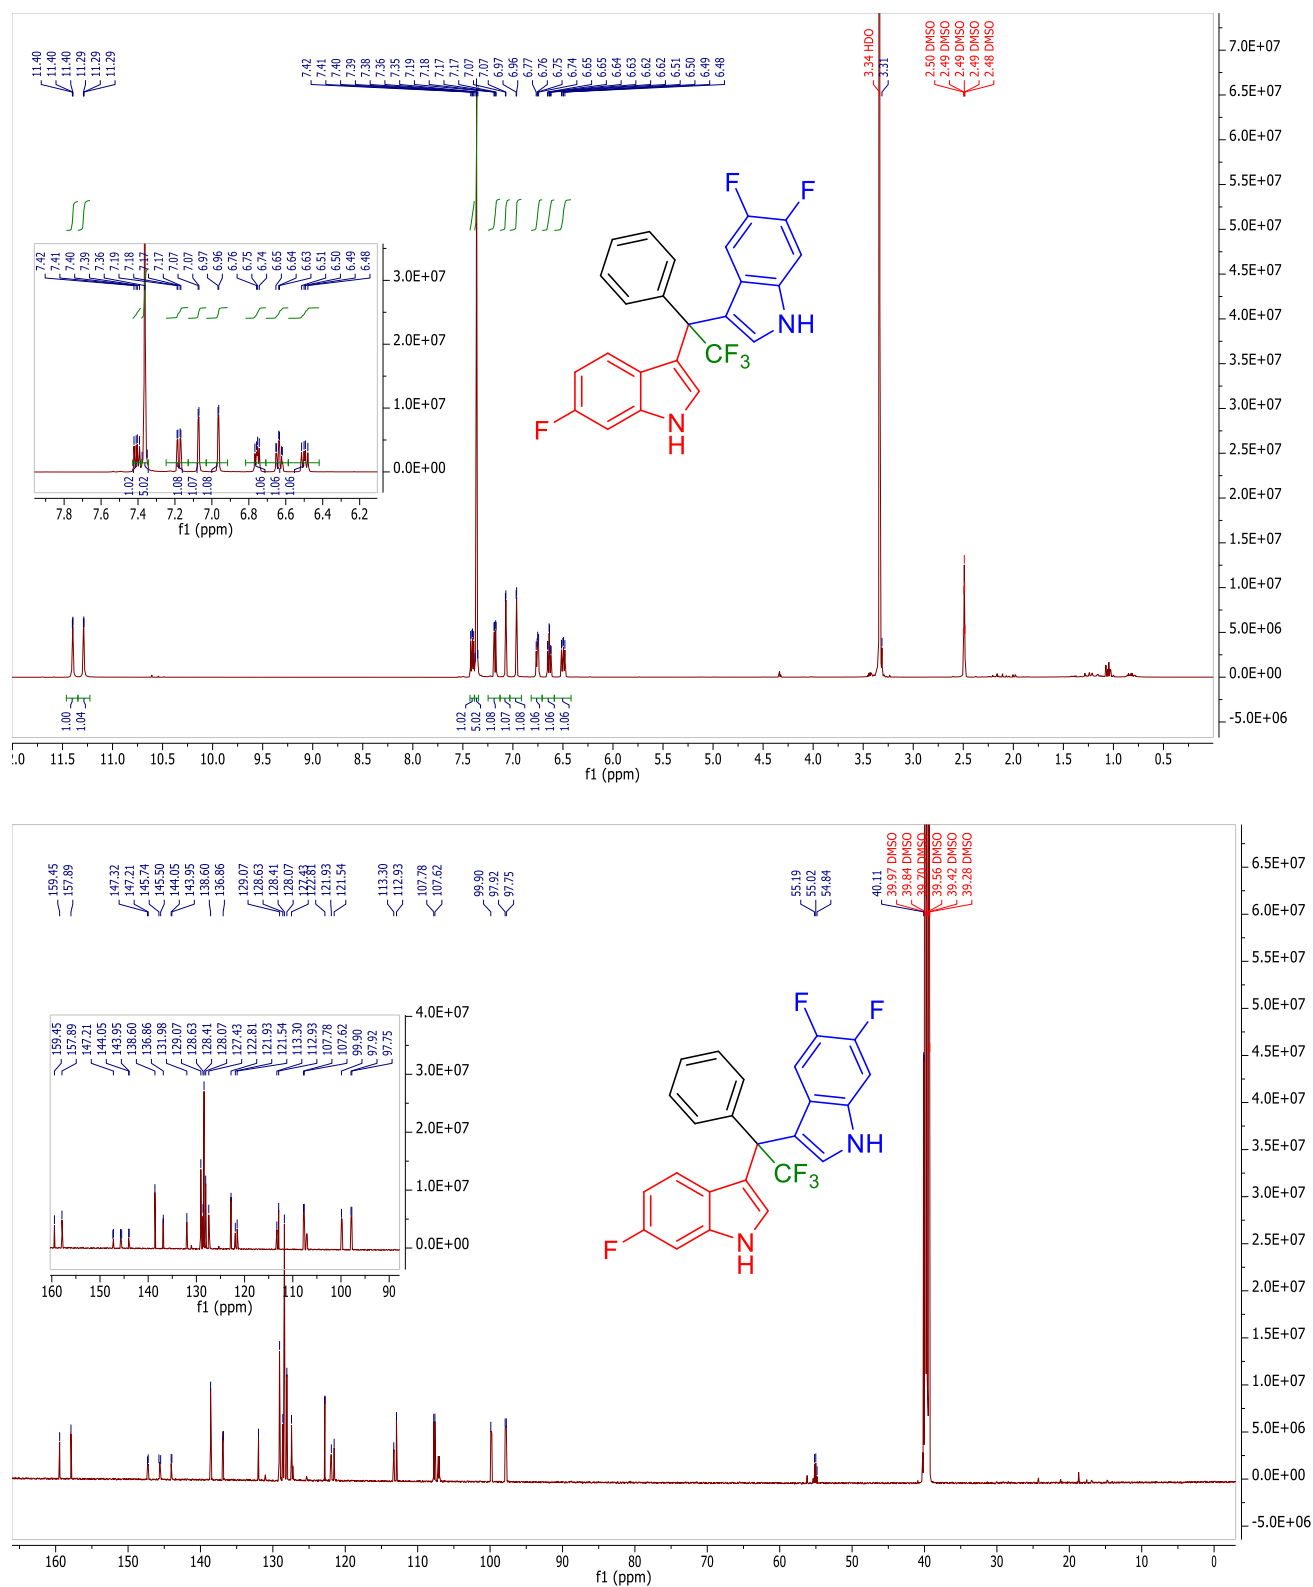

**Figure S16.** <sup>1</sup>H (600 MHz) and <sup>13</sup>C (151 MHz) Spectra of 5,6-difluoro-3-(2,2,2-trifluoro-1-(6-fluoro-1*H*-indol-3-yl)-1-phenylethyl)-1*H*-indole (**3m**)

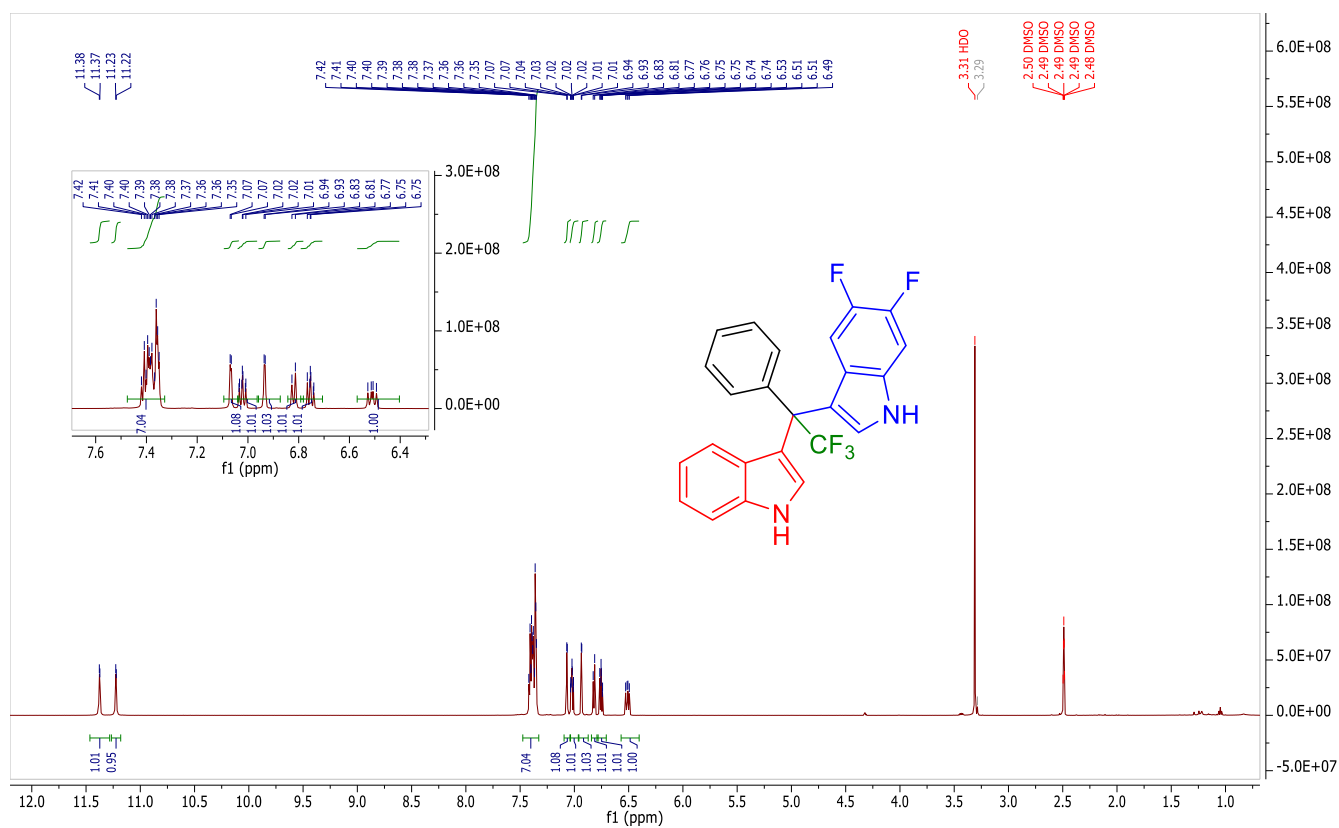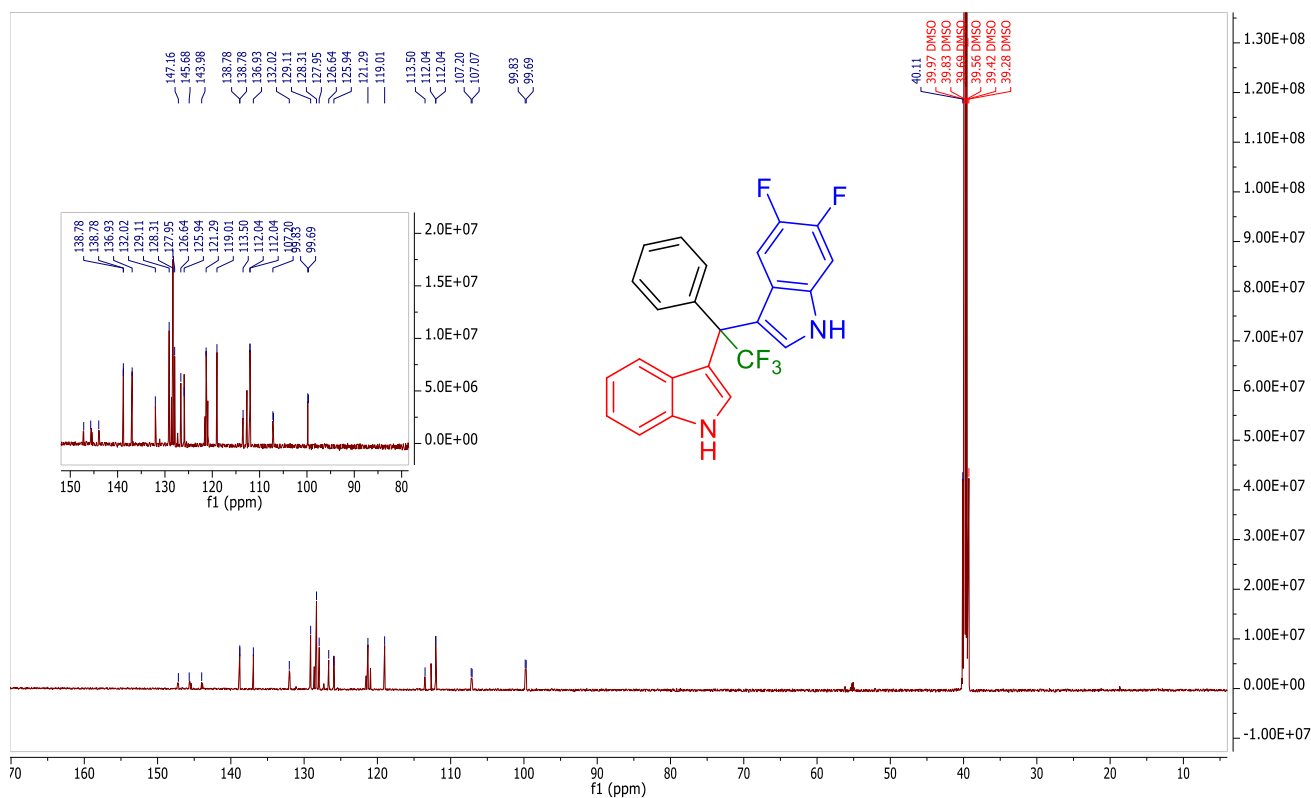

**Figure S17.** <sup>1</sup>H (600 MHz) and <sup>13</sup>C (151 MHz) Spectra of 5,6-difluoro-3-(2,2,2-trifluoro-1-(1H-indol-3-yl)-1-phenylethyl)-1H-indole (**3n**)

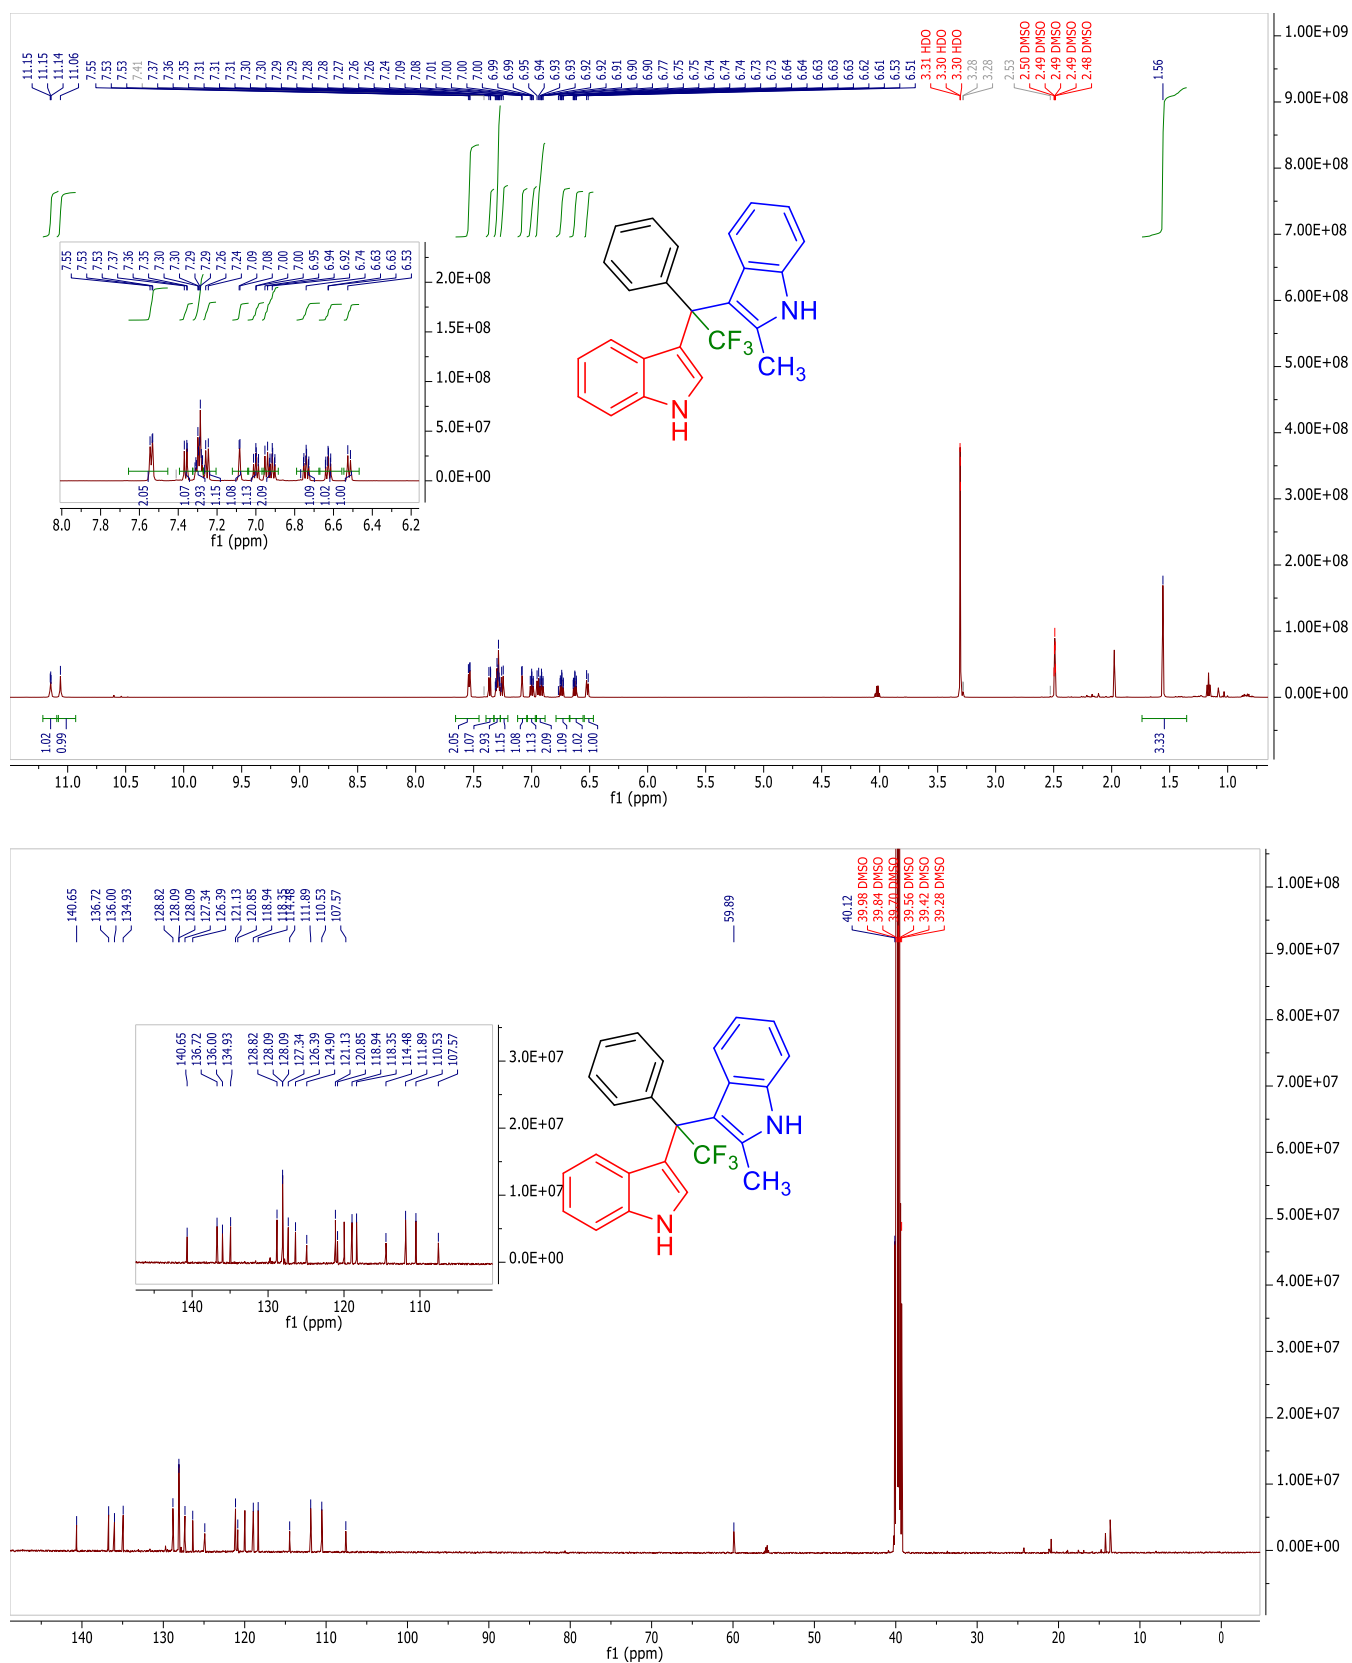

**Figure S18.** <sup>1</sup>H (600 MHz) and <sup>13</sup>C (151 MHz) Spectra of 2-methyl-3-(2,2,2-trifluoro-1-(*1H*-indol-3-yl)-1-phenylethyl)-1*H*-indole (**30**)

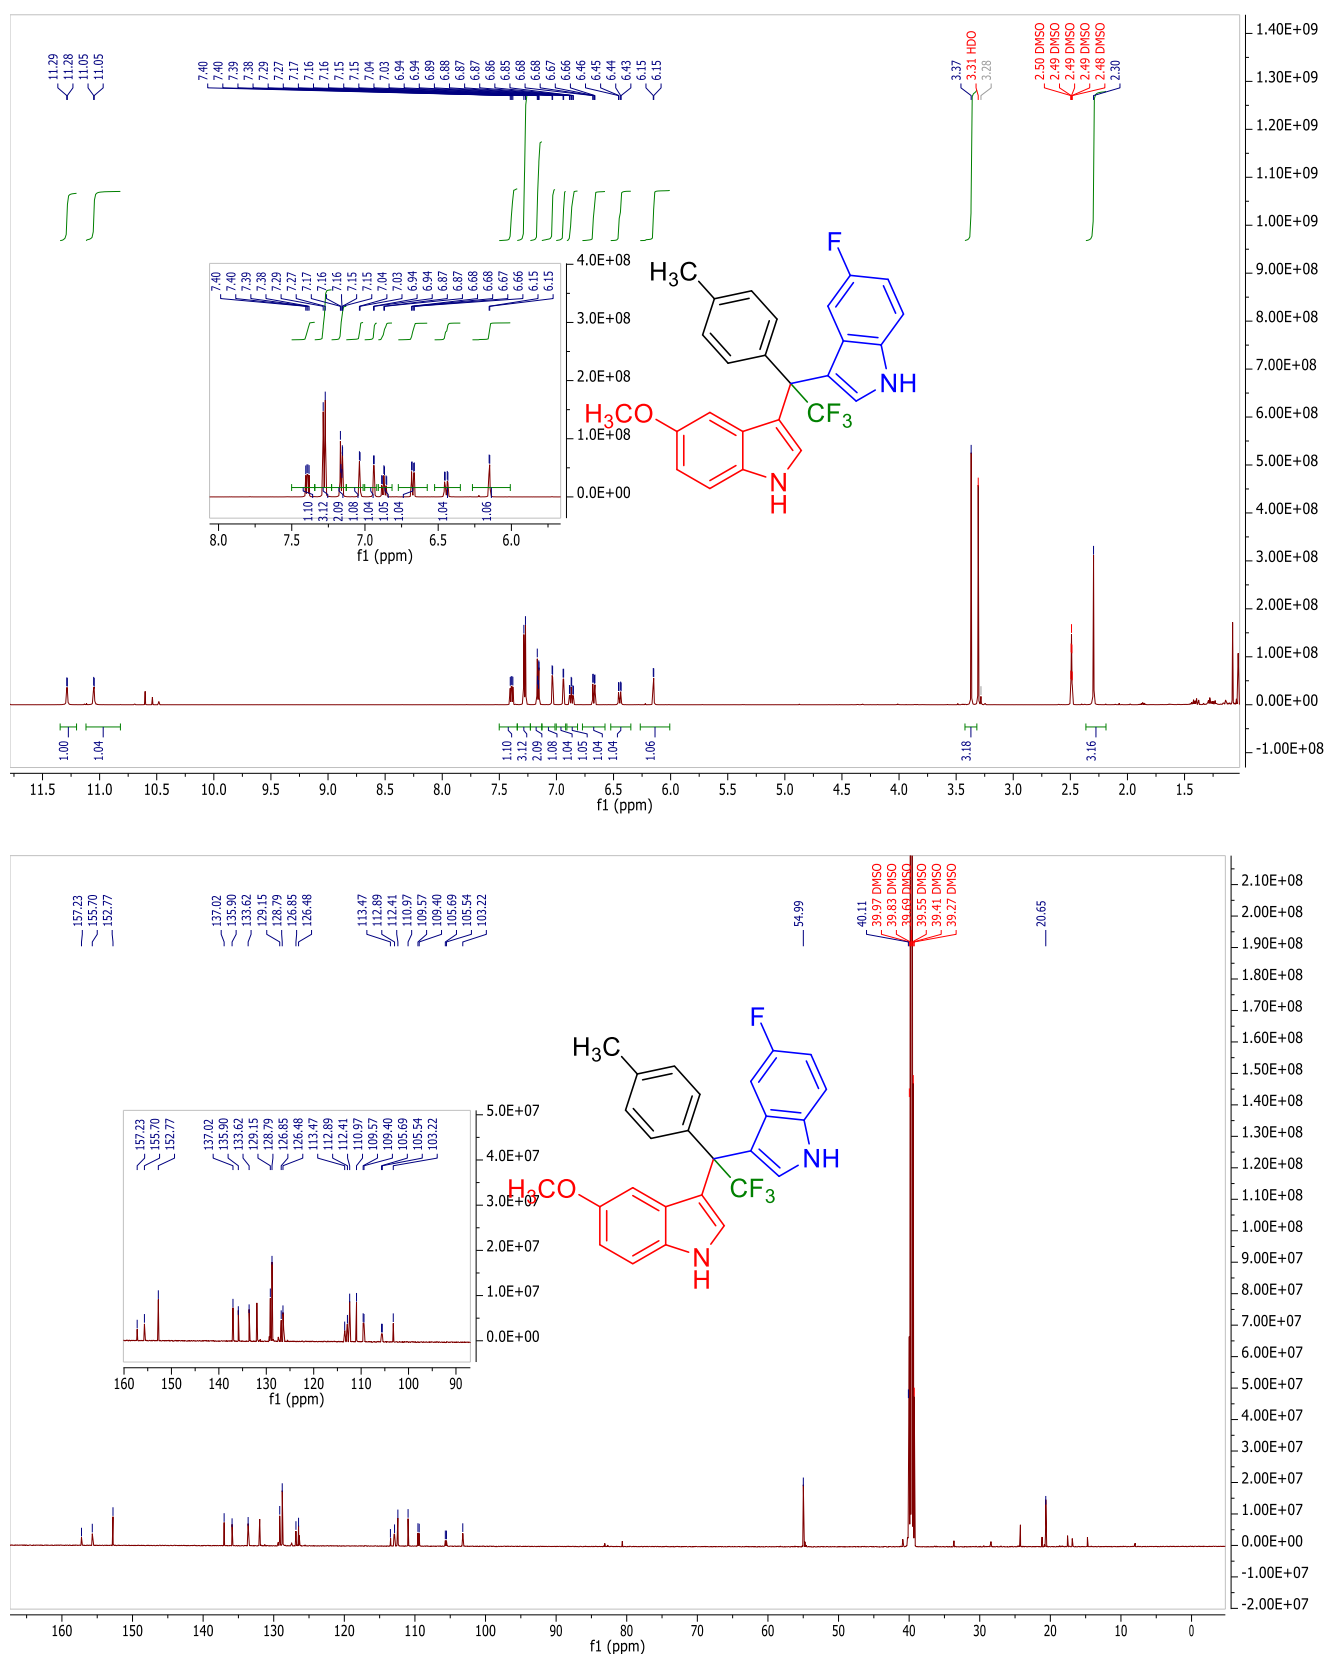

**Figure S19.** <sup>1</sup>H (600 MHz) and <sup>13</sup>C (151 MHz) Spectra of 5-fluoro-3-(2,2,2-trifluoro-1-(5-methoxy-1H-indol-3-yl)-1-(p-tolyl)ethyl)-1H-indole (**3p**)

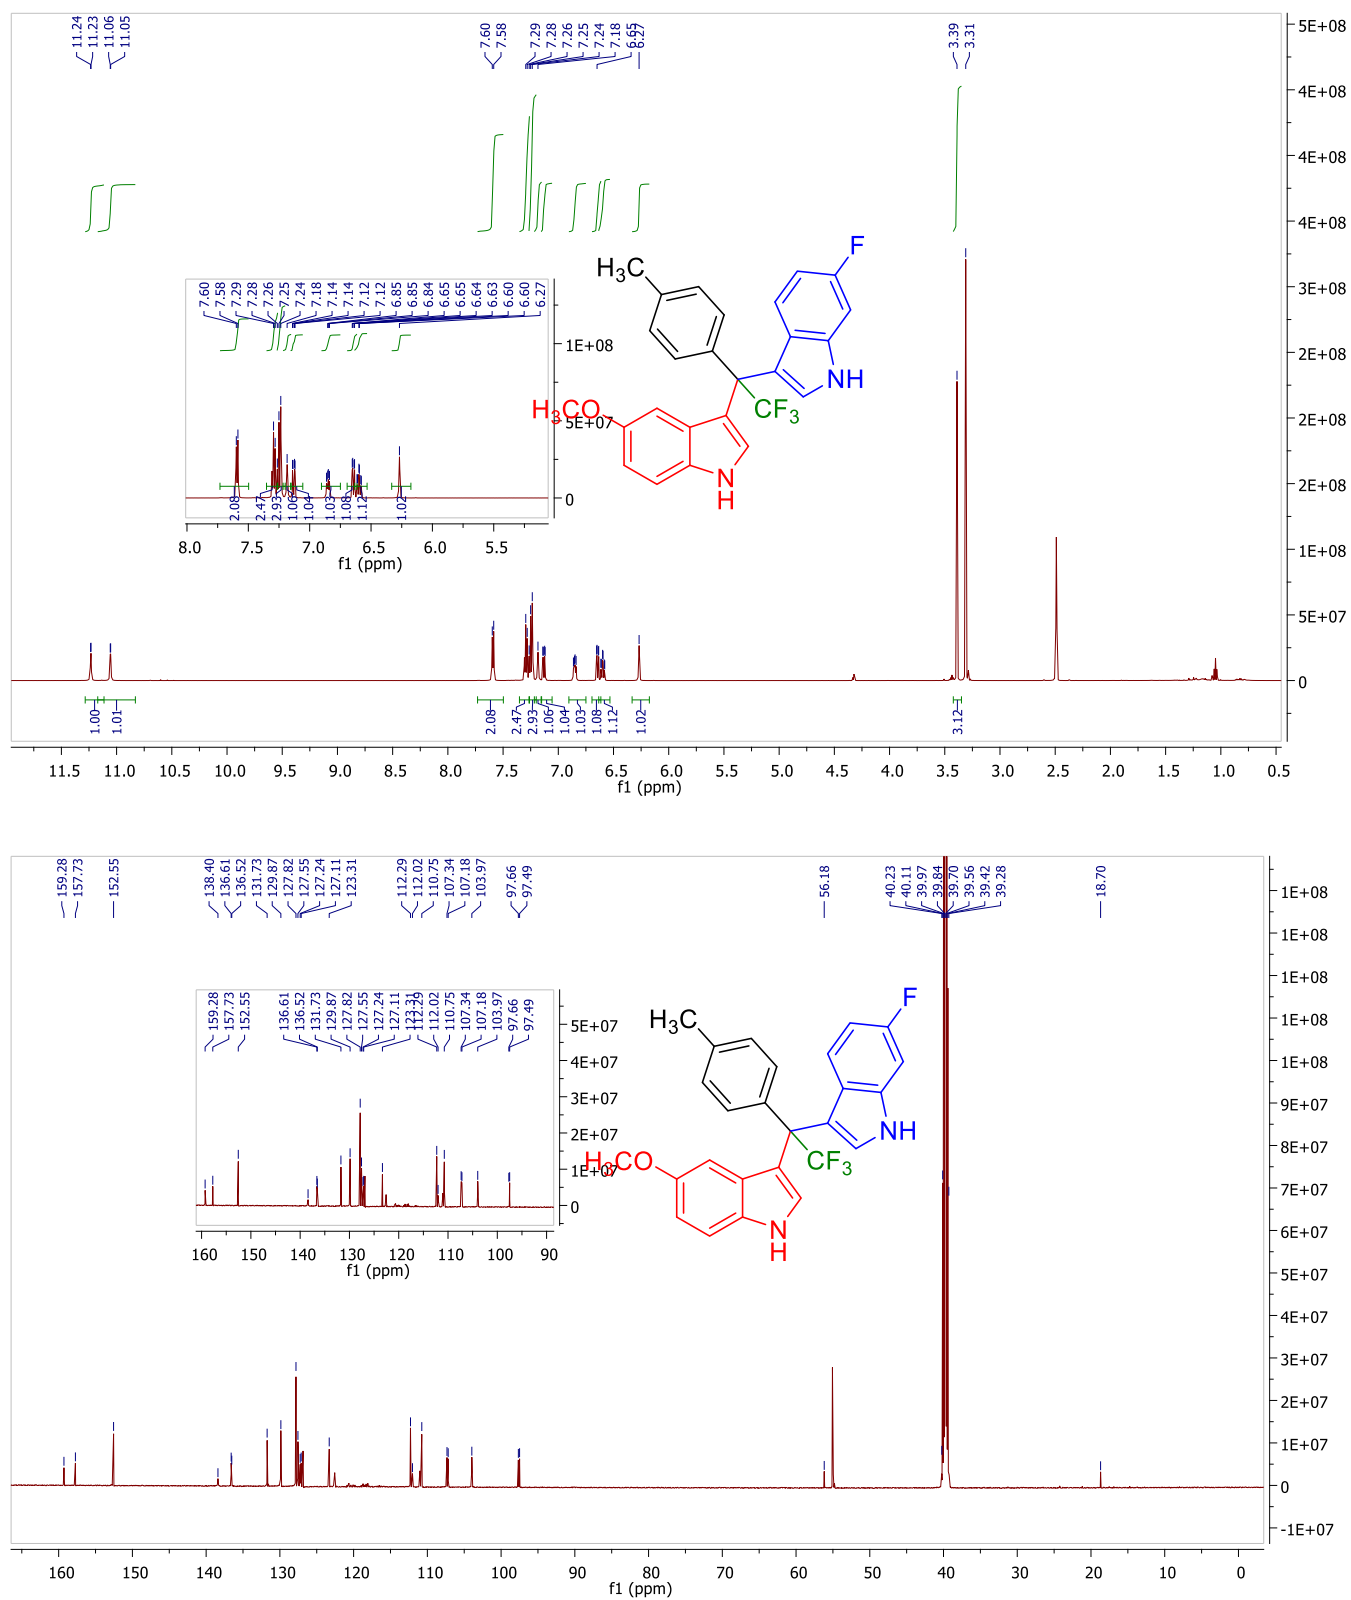

**Figure S20.** <sup>1</sup>H (600 MHz) and <sup>13</sup>C (151 MHz) Spectra of 6-fluoro-3-(2,2,2-trifluoro-1-(5-methoxy-1*H*-indol-3-yl)-1-(*p*-tolyl)ethyl)-1*H*-indole (**3q**)



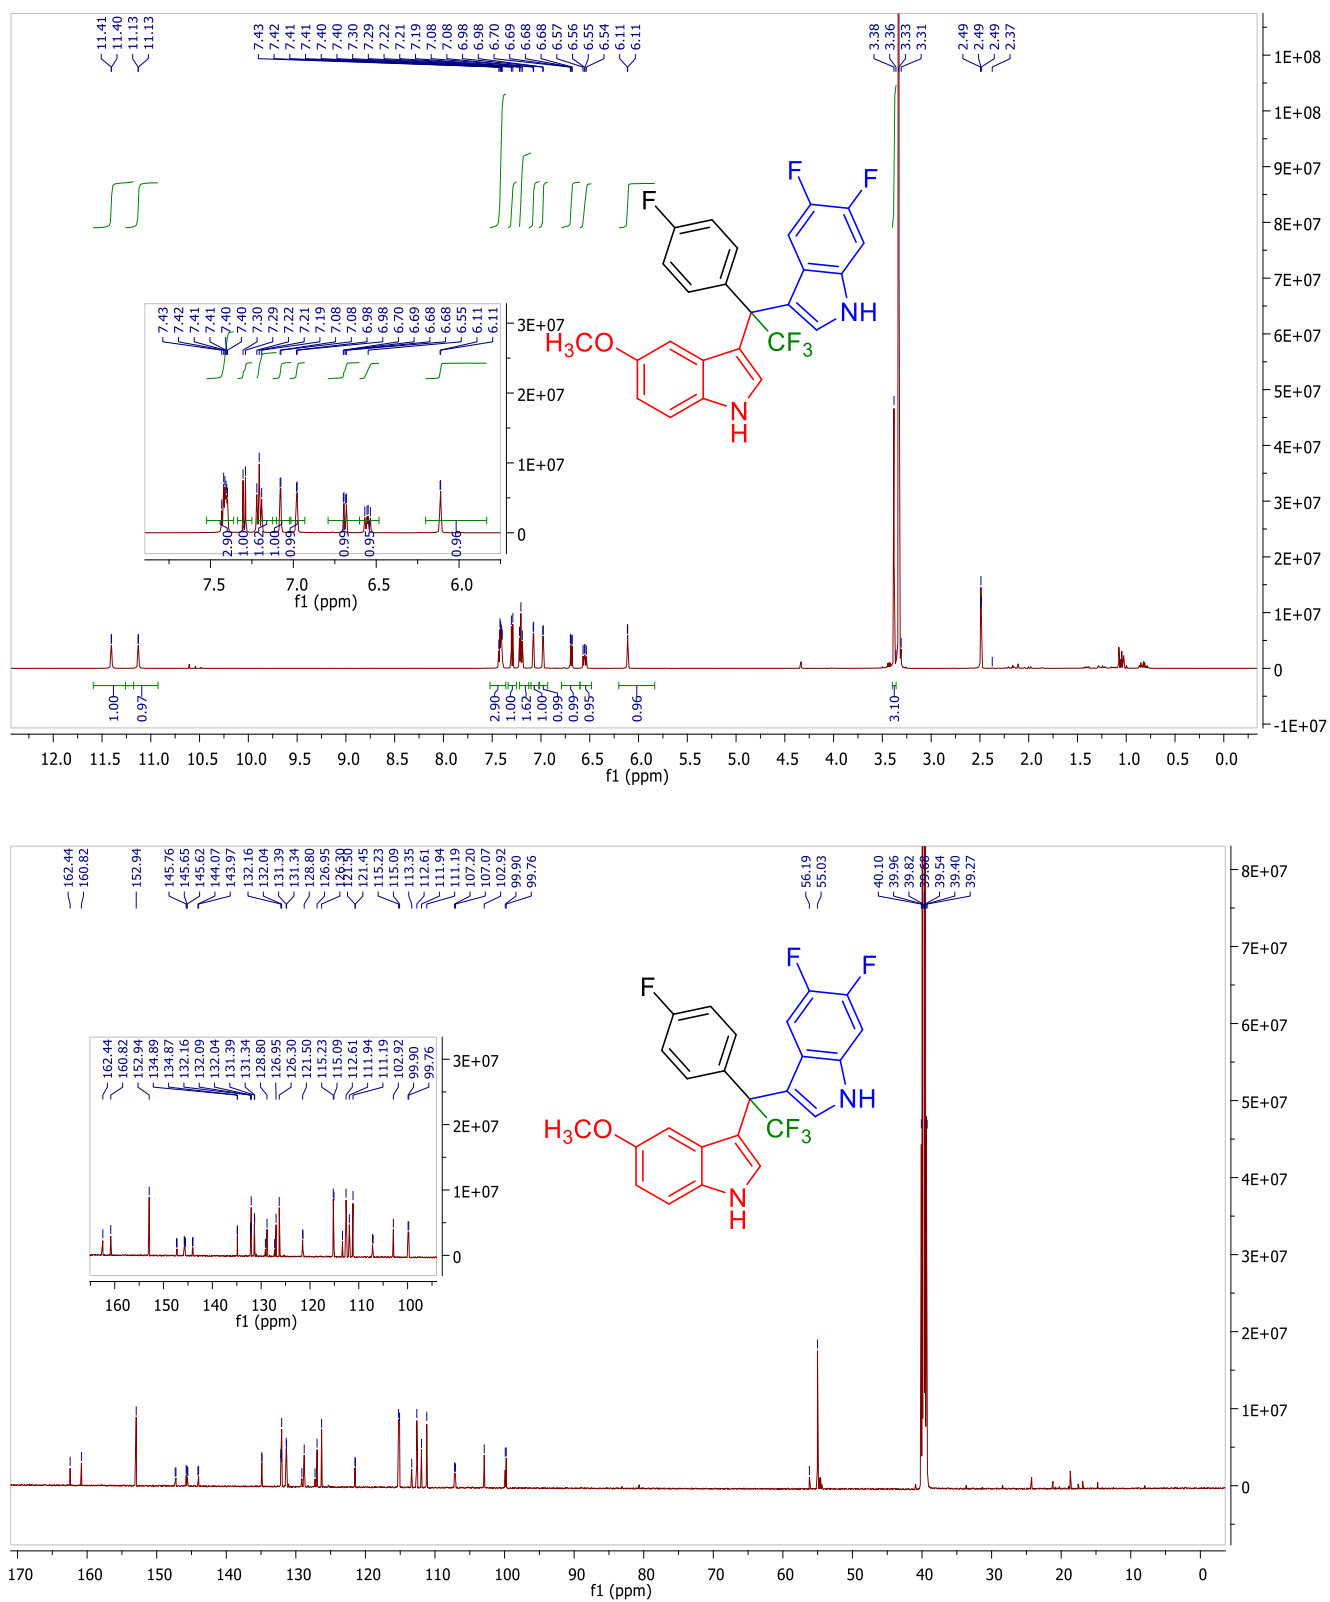

**Figure S21.** <sup>1</sup>H (600 MHz) and <sup>13</sup>C (151 MHz) Spectra of 5,6-difluoro-3-(2,2,2-trifluoro-1-(4-fluorophenyl)-1H-indol-3-ylethyl)-1H-indole (**3r**)

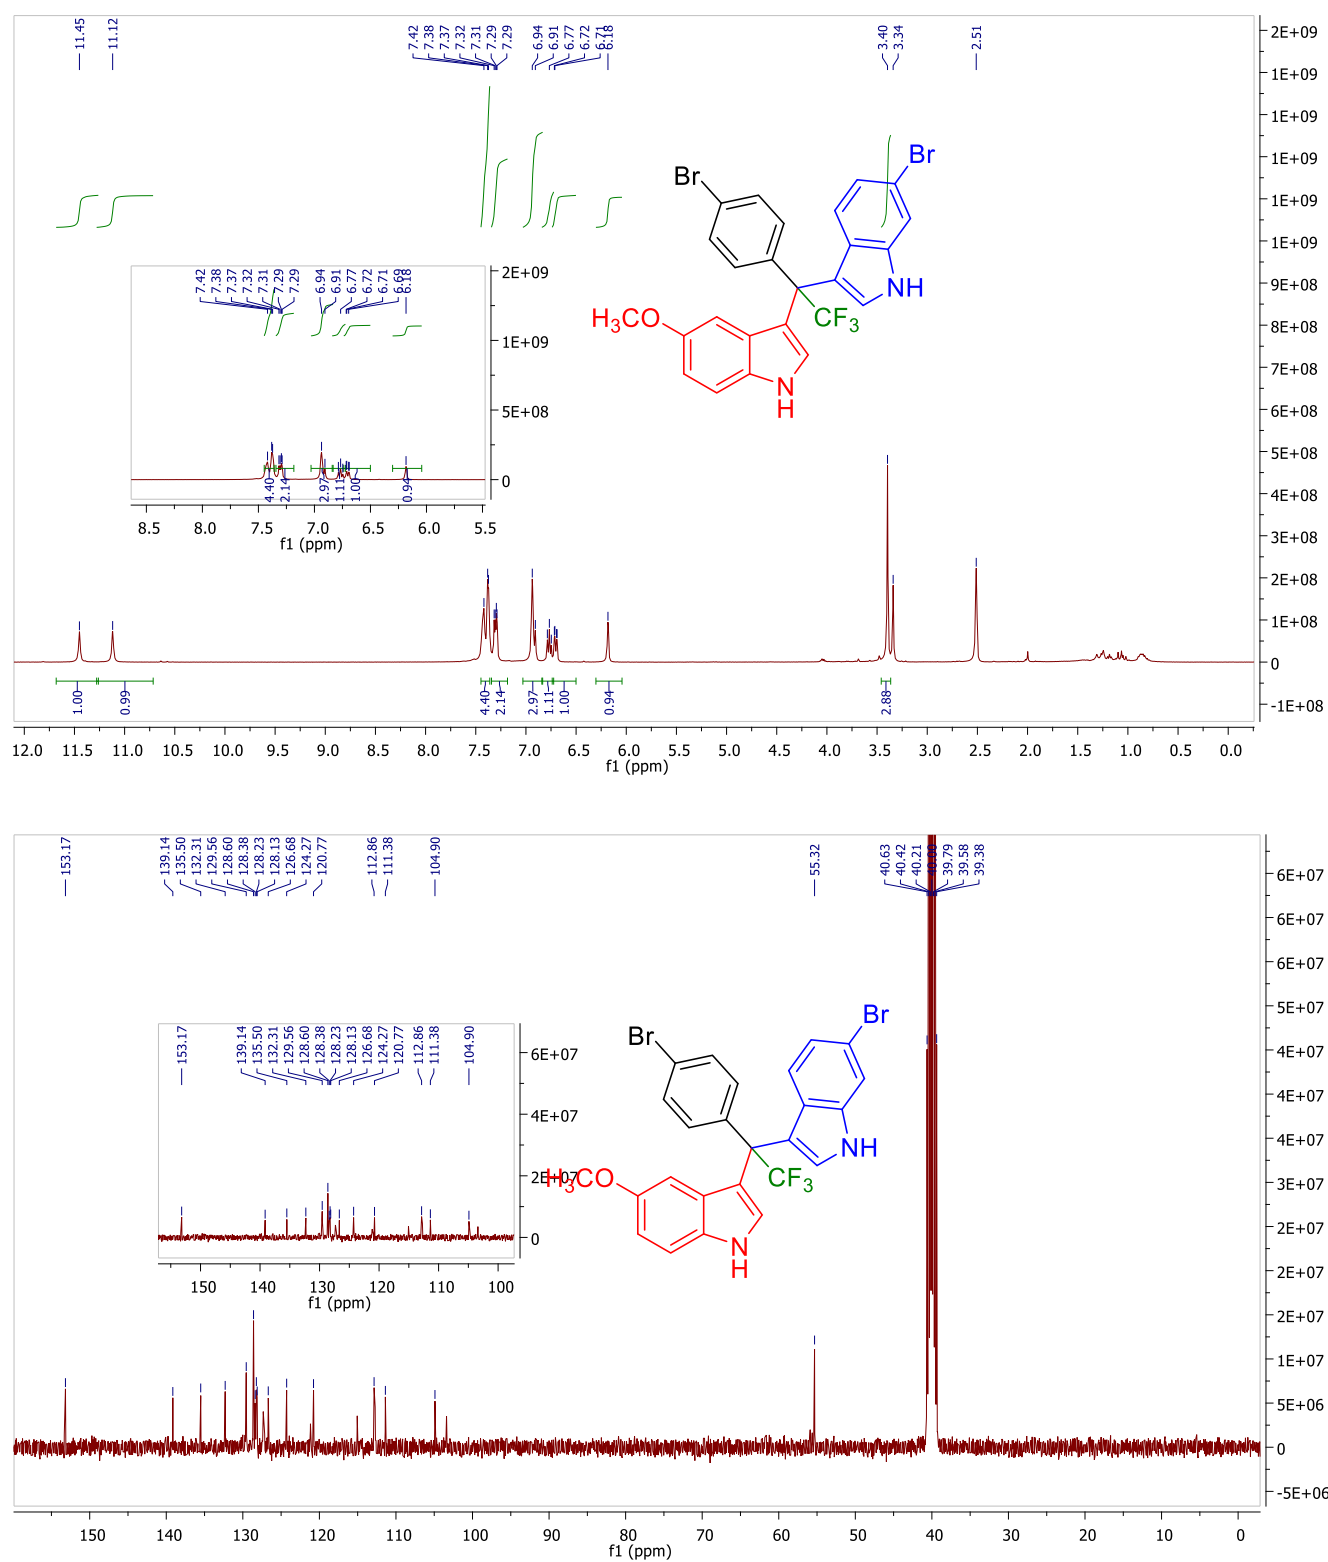

**Figure S22.** <sup>1</sup>H (600 MHz) and <sup>13</sup>C (151 MHz) Spectra of 6-bromo-3-(1-(4-bromophenyl)-2,2,2-trifluoro-1-(5-methoxy-1*H*-indol-3-yl)ethyl)-1*H*-indole (**3s**)

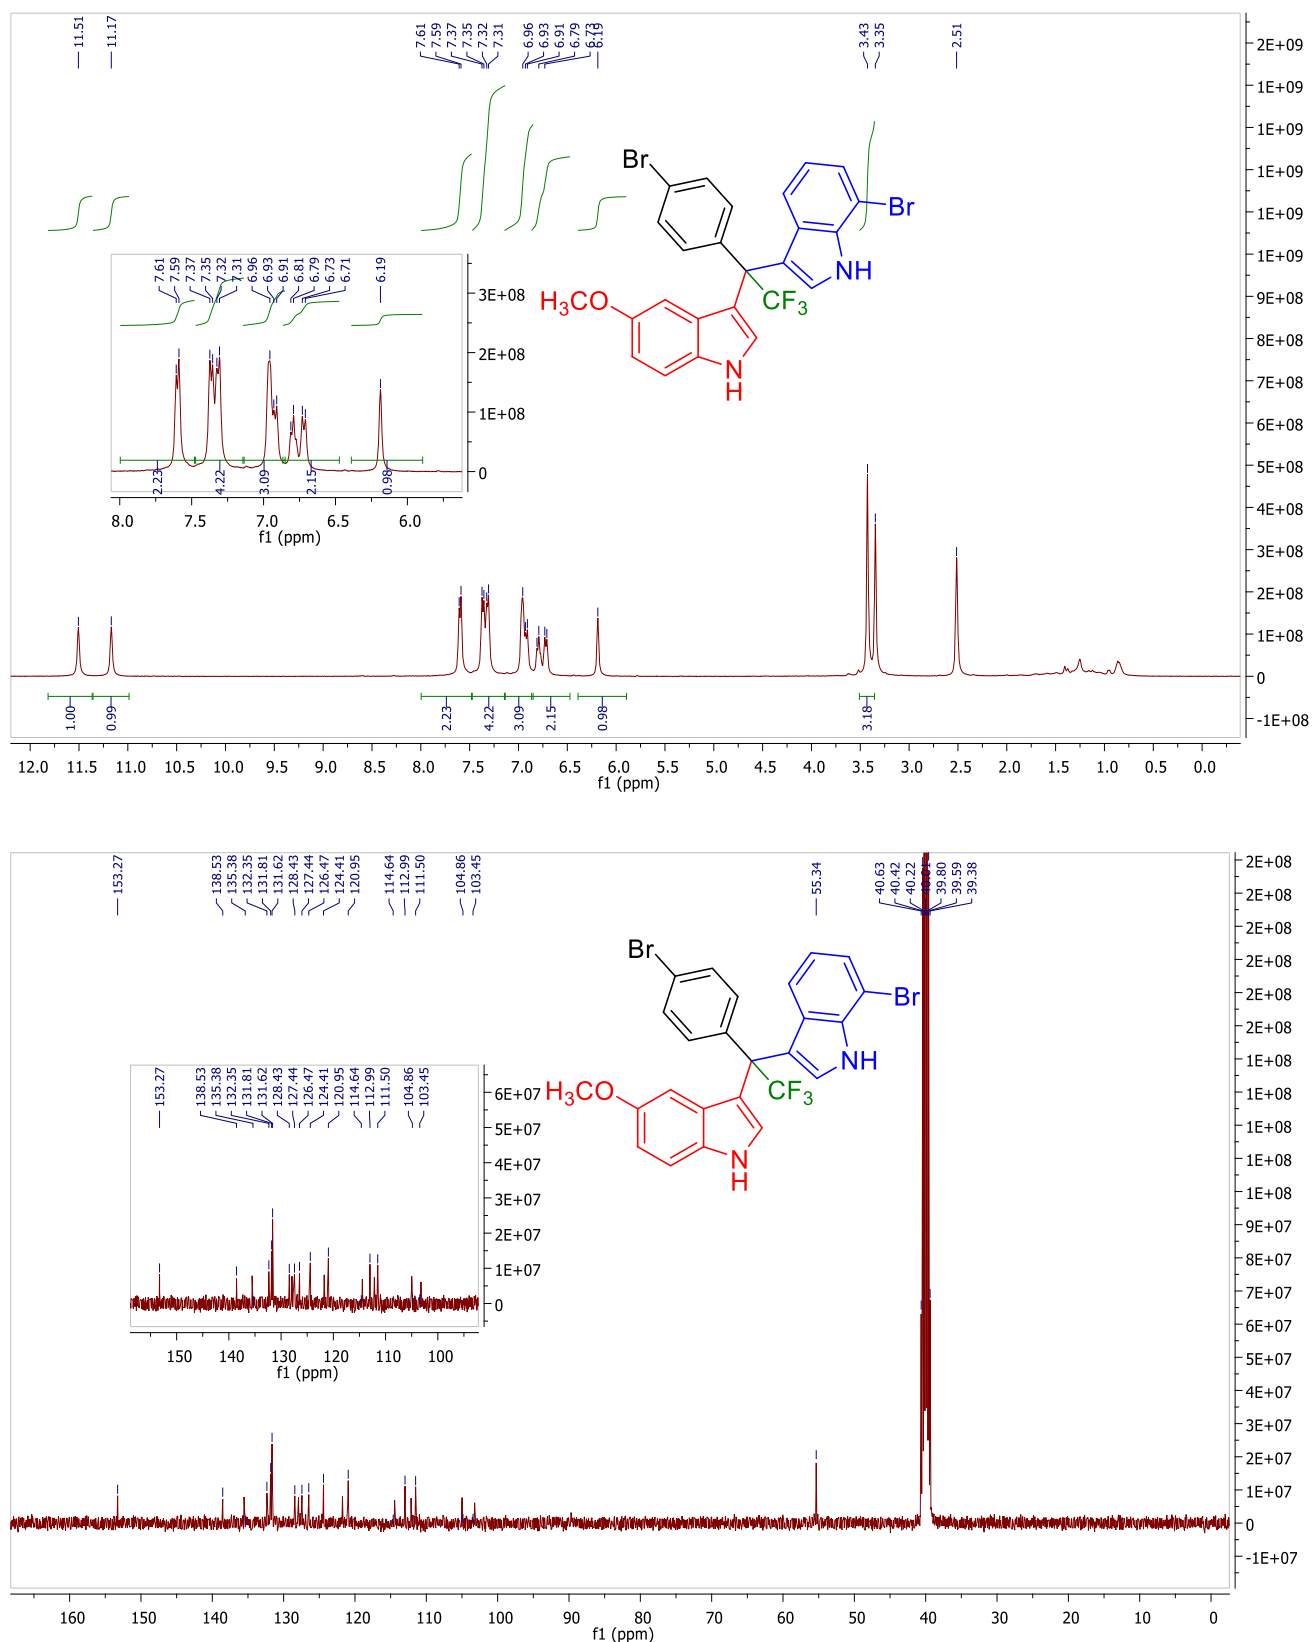

**Figure S23.** <sup>1</sup>H (600 MHz) and <sup>13</sup>C (151 MHz) Spectra of 7-bromo-3-(1-(4-bromophenyl)-2,2,2-trifluoro-1*H*-indol-3-yl)ethyl-1*H*-indole (**3t**)

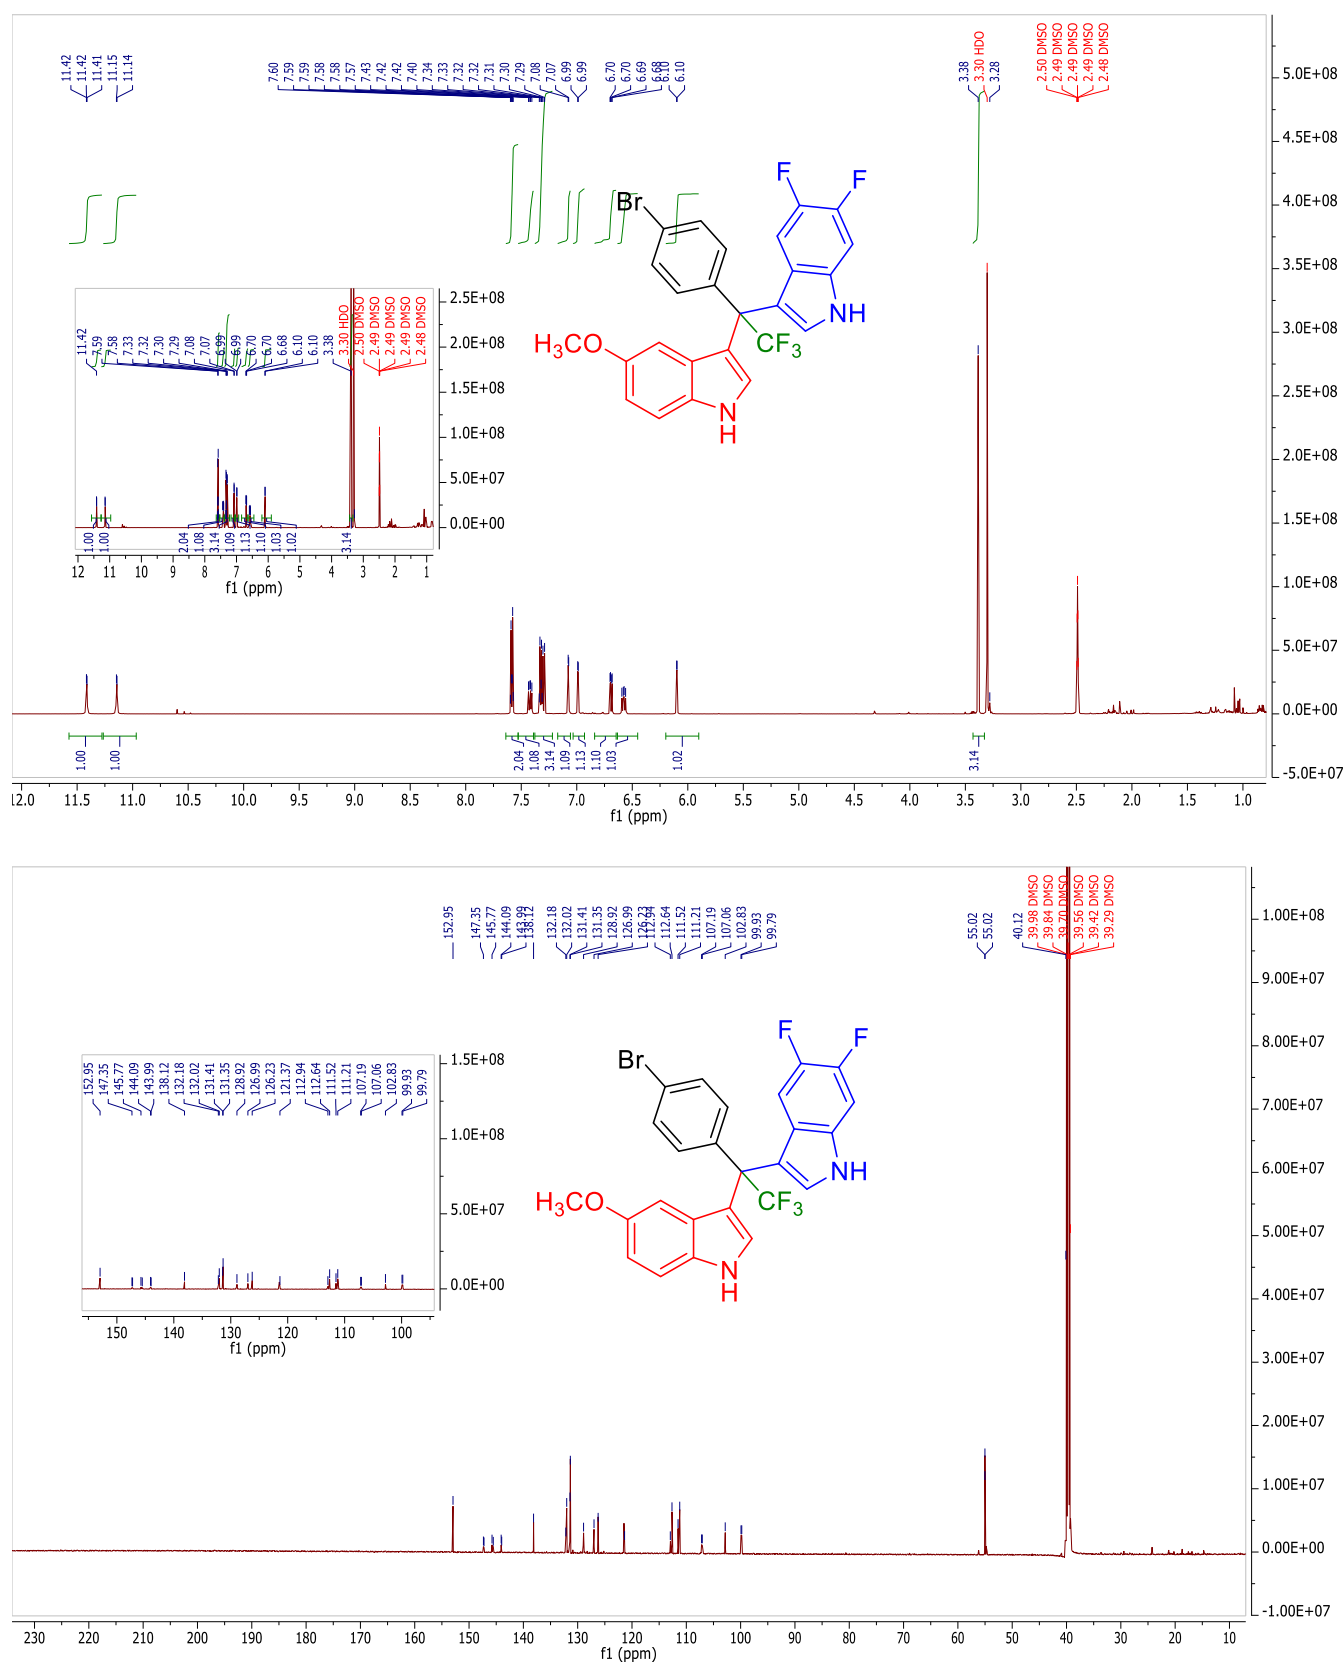

**Figure S24.** <sup>1</sup>H (600 MHz) and <sup>13</sup>C (151 MHz) Spectra of 3-(1-(4-bromophenyl)-2,2,2-trifluoro-1-(5-methoxy-1*H*-indol-3-yl)ethyl)-5,6-difluoro-1*H*-indole (**3u**)

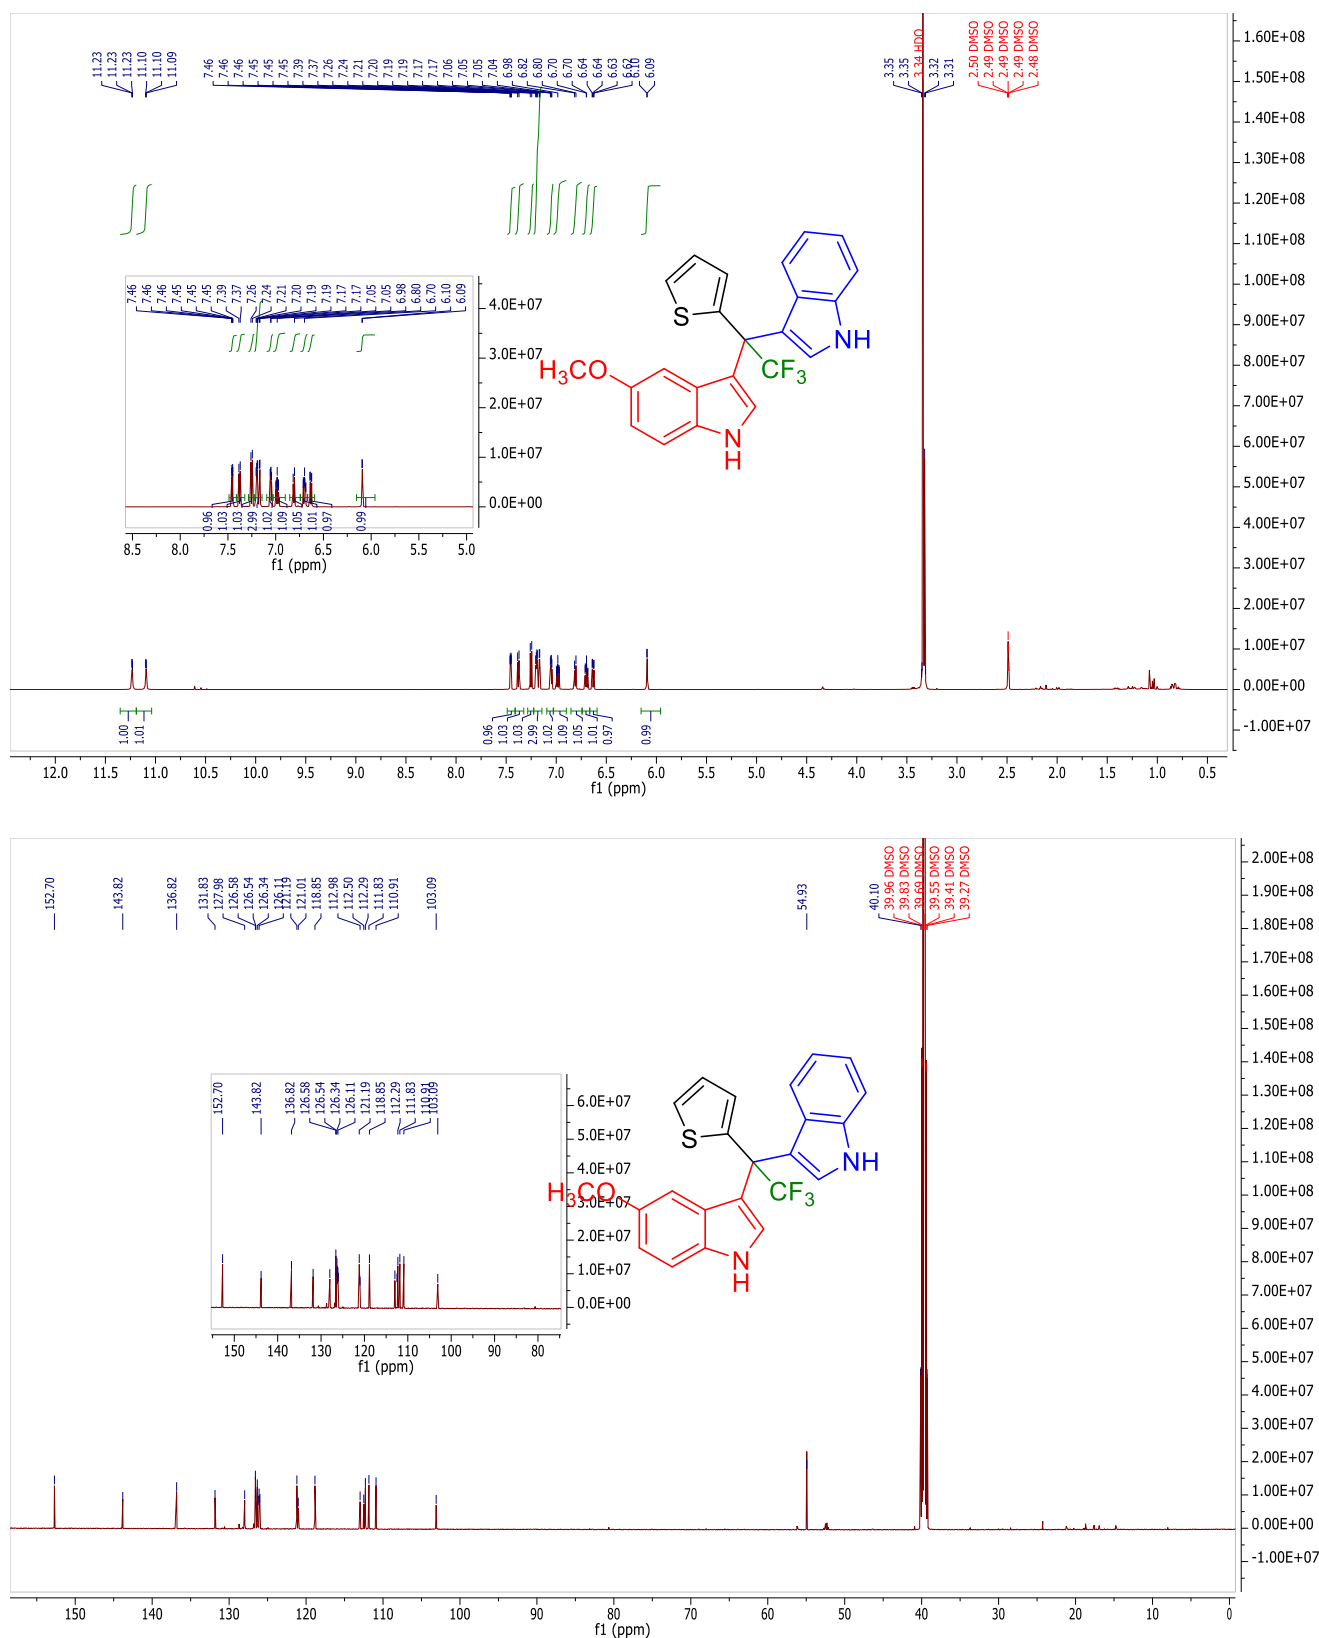

**Figure S25.** <sup>1</sup>H (600 MHz) and <sup>13</sup>C (151 MHz) Spectra of 5-methoxy-3-(2,2,2-trifluoro-1-(1*H*-indol-3-yl)-1-(thiophen-2-yl)ethyl)-1*H*-indole (**3v**)

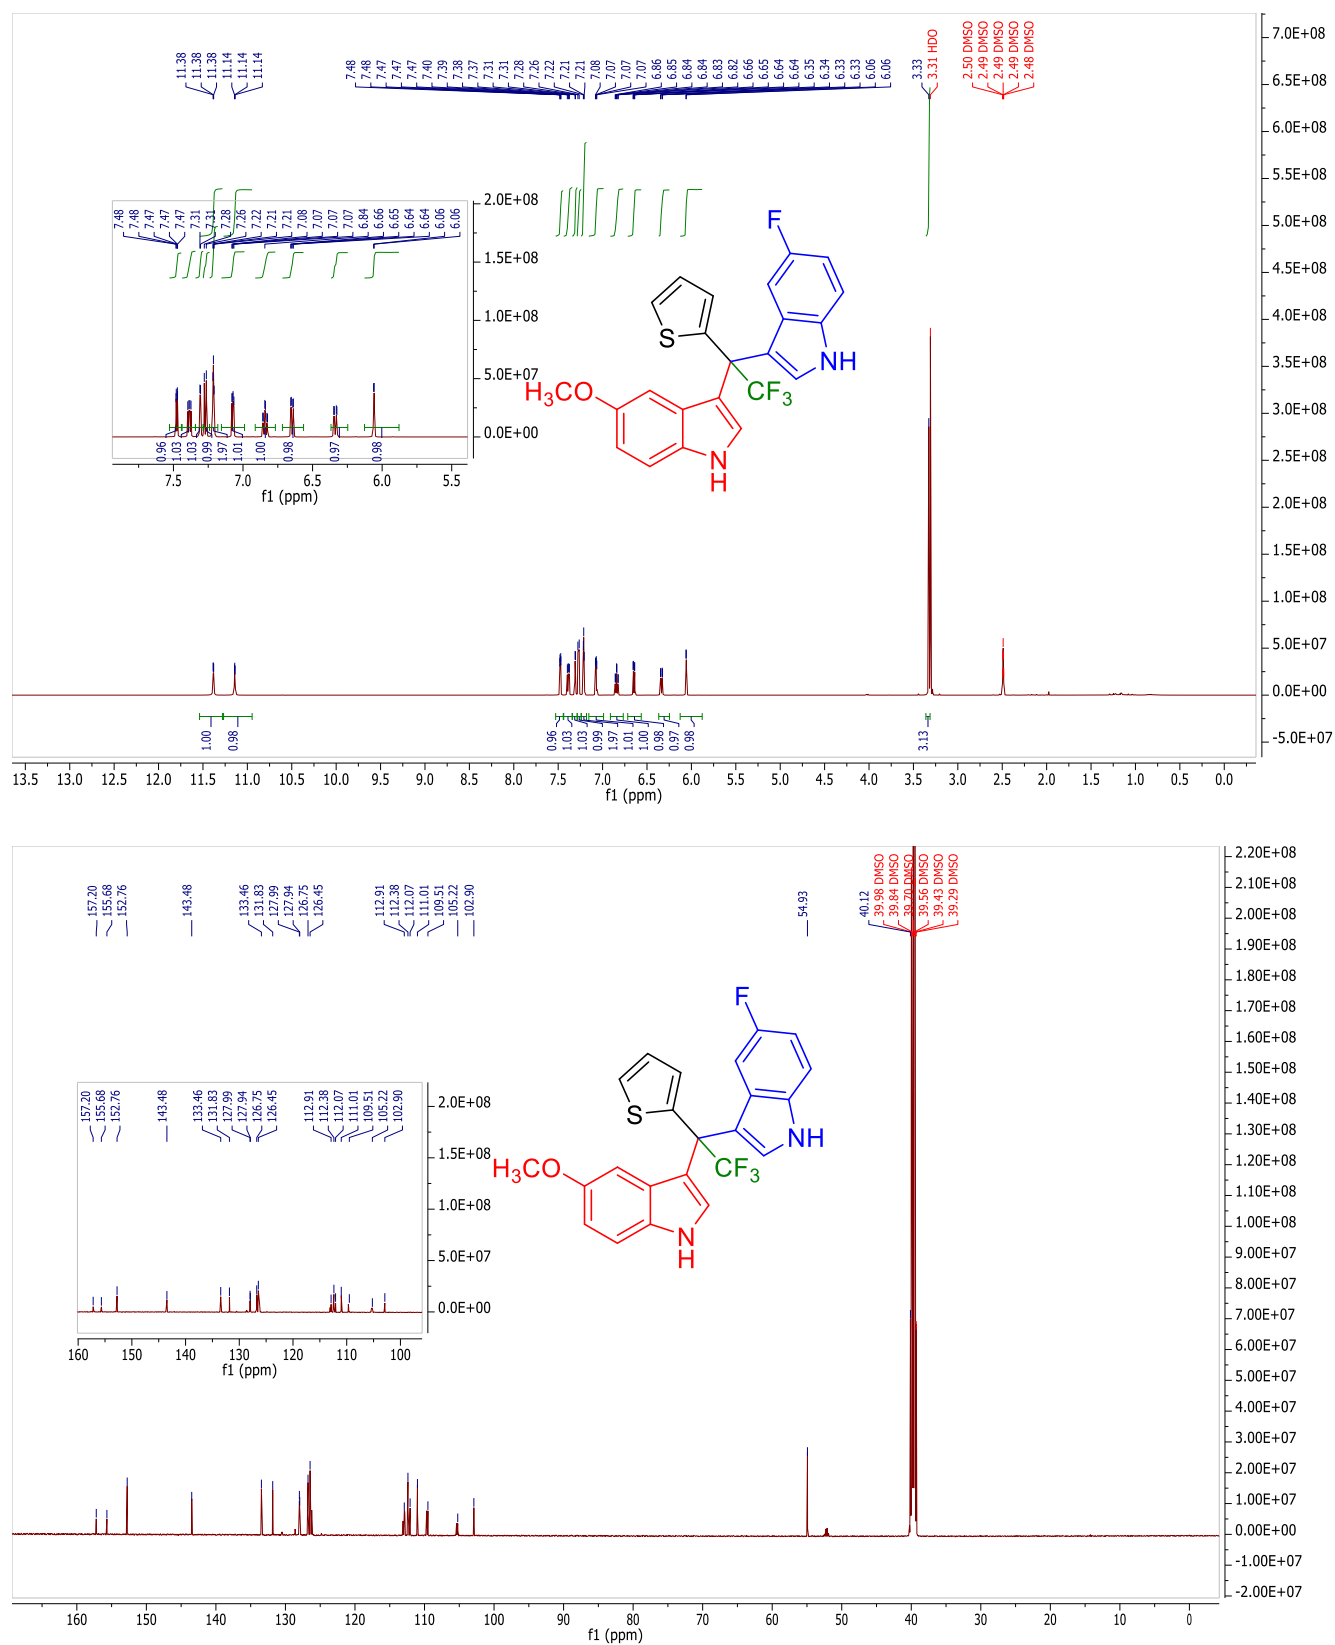

**Figure S26.** <sup>1</sup>H (600 MHz) and <sup>13</sup>C (151 MHz) Spectra of 5-fluoro-3-(2,2,2-trifluoro-1-(5-methoxy-1H-indol-3-yl)-1-(thiophen-2-yl)ethyl)-1H-indole (**3w**)

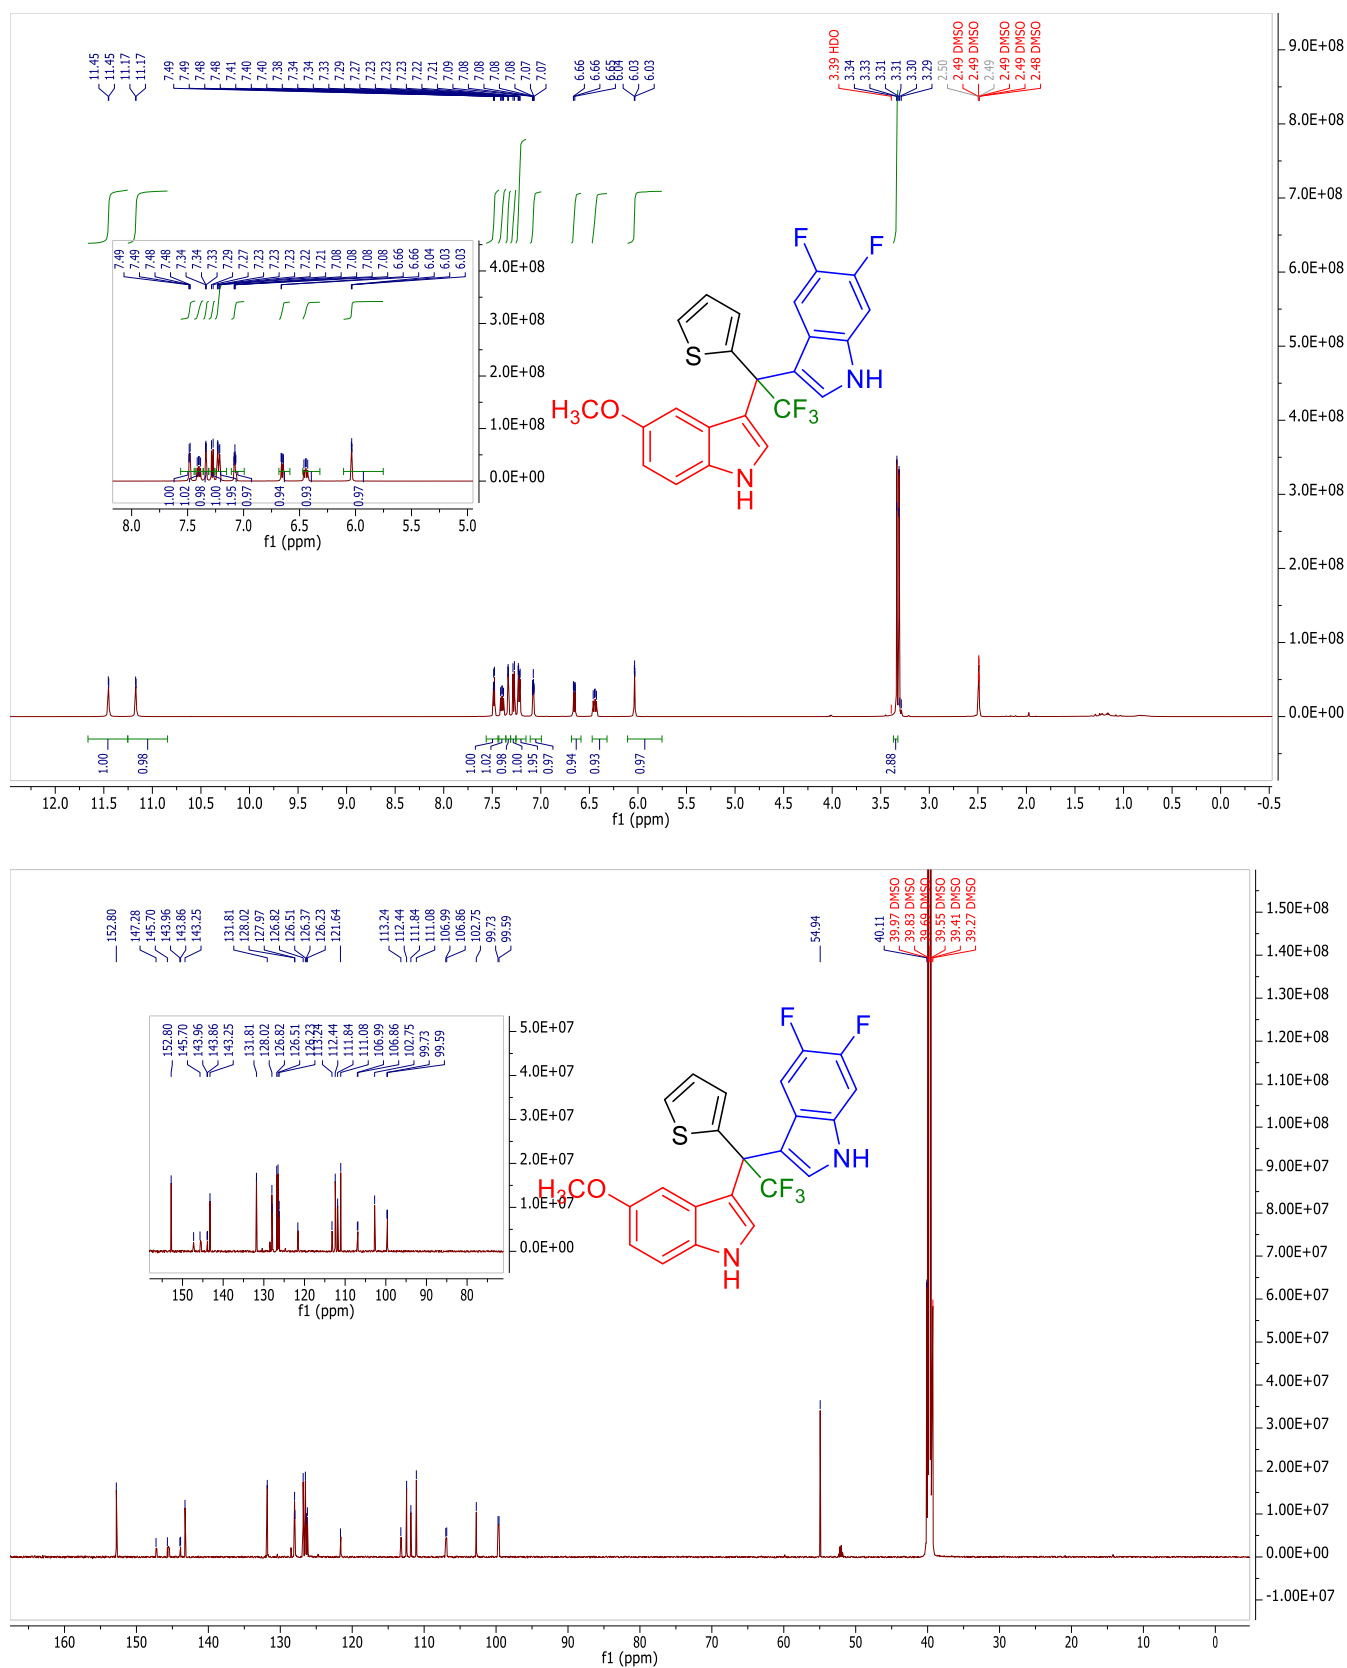

**Figure S27.** <sup>1</sup>H (600 MHz) and <sup>13</sup>C (151 MHz) Spectra of 5,6-difluoro-3-(2,2,2-trifluoro-1-(5-methoxy-1*H*-indol-3-yl)-1-(thiophen-2-yl)ethyl)-1*H*-indole (**3x**)

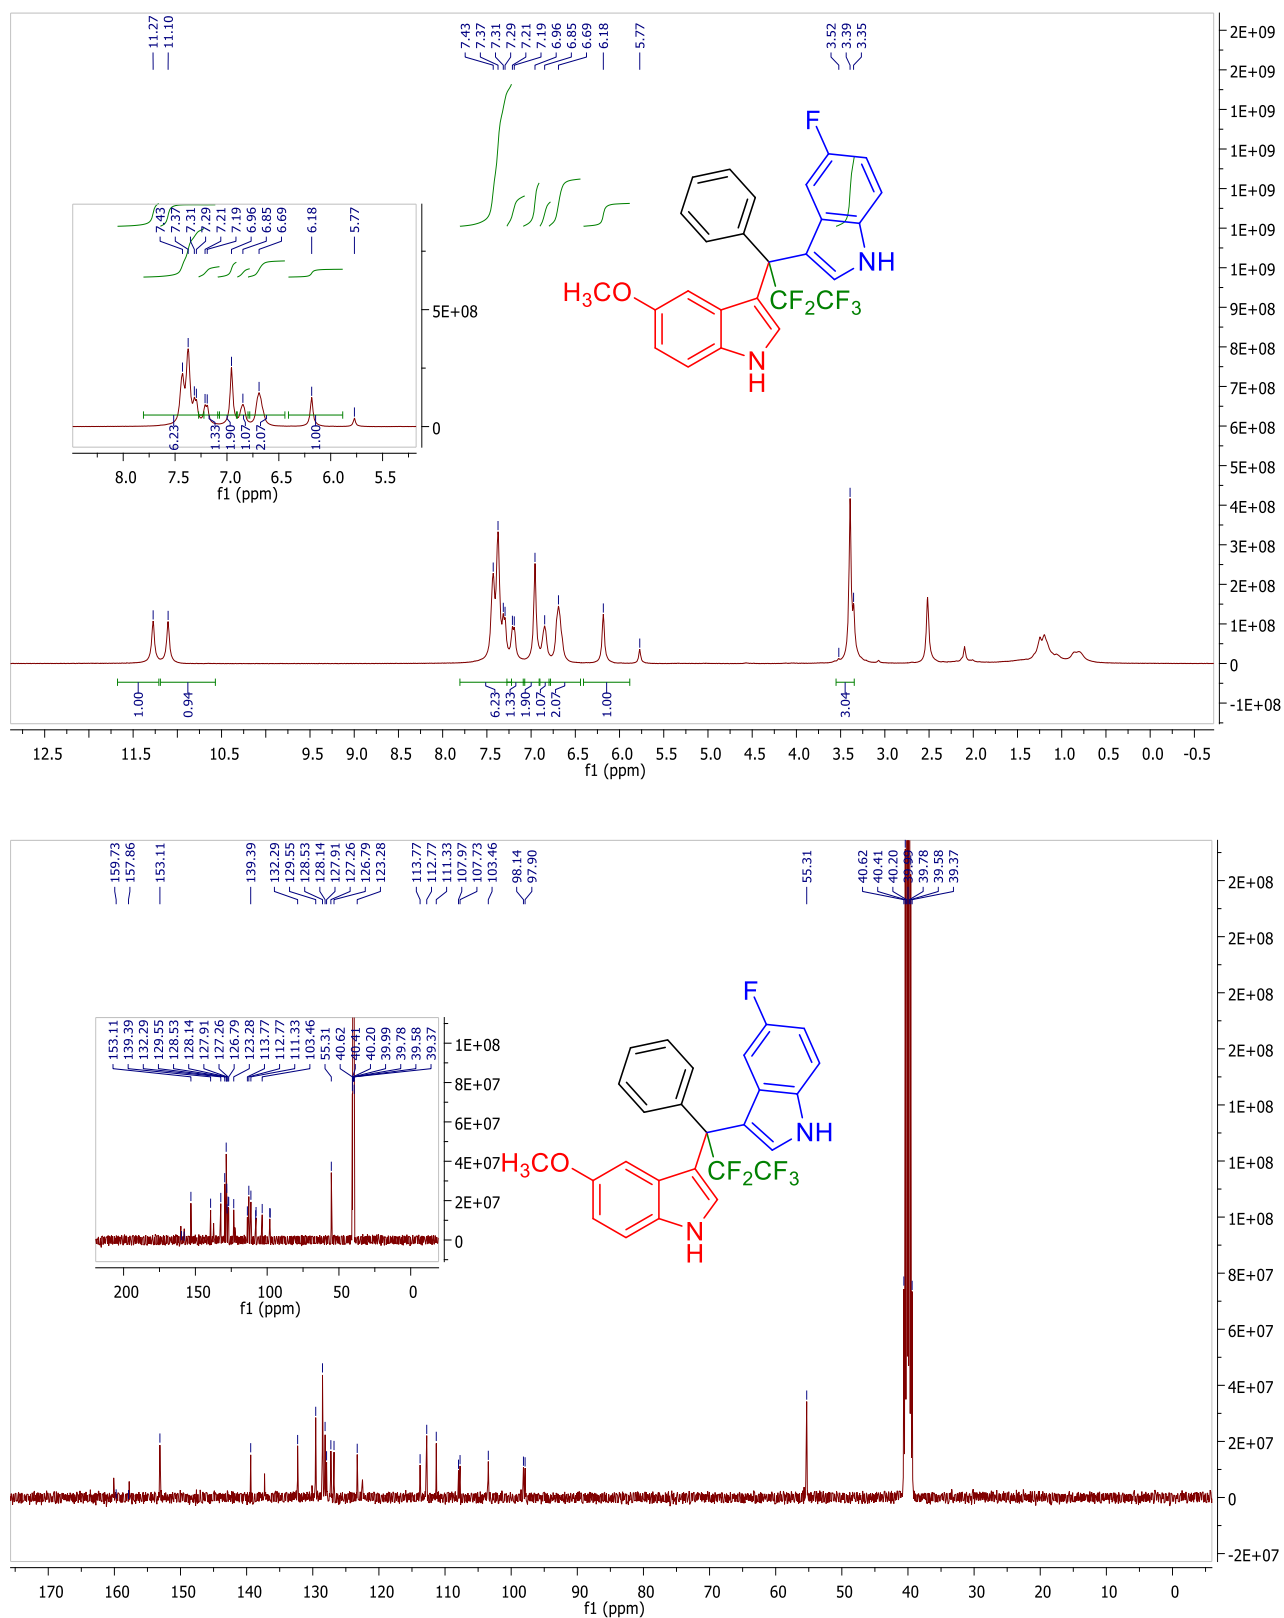

**Figure S28.** <sup>1</sup>H (600 MHz) and <sup>13</sup>C (151 MHz) Spectra of 5-fluoro-3-(2,2,3,3,3-pentafluoro-1-(5-methoxy-1*H*-indol-3-yl)-1-phenylpropyl)-1*H*-indole (**3y**)



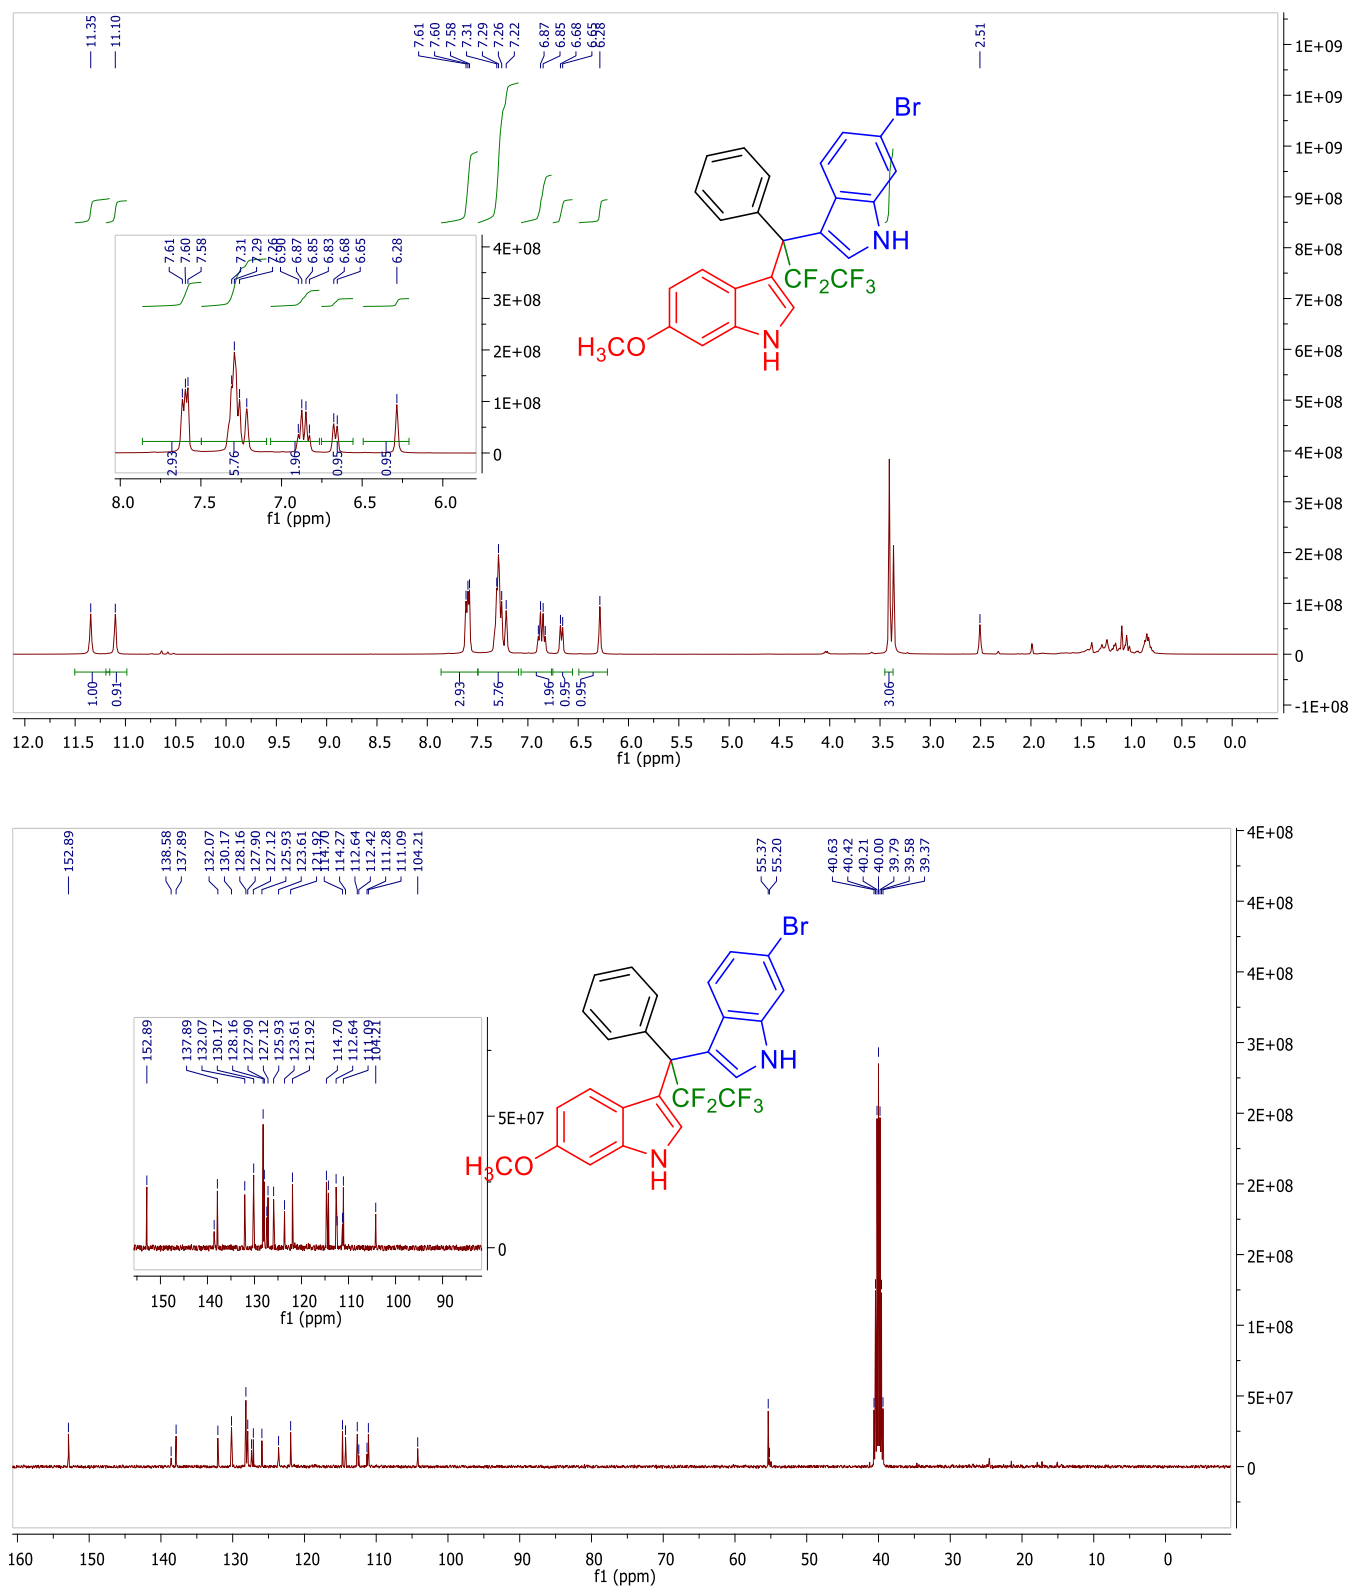

**Figure S29.** <sup>1</sup>H (600 MHz) and <sup>13</sup>C (151 MHz) Spectra of 6-bromo-3-(2,2,3,3,3-pentafluoro-1-(6-methoxy-1H-indol-3-yl)-1-phenylpropyl)-1H-indole (**3z**)

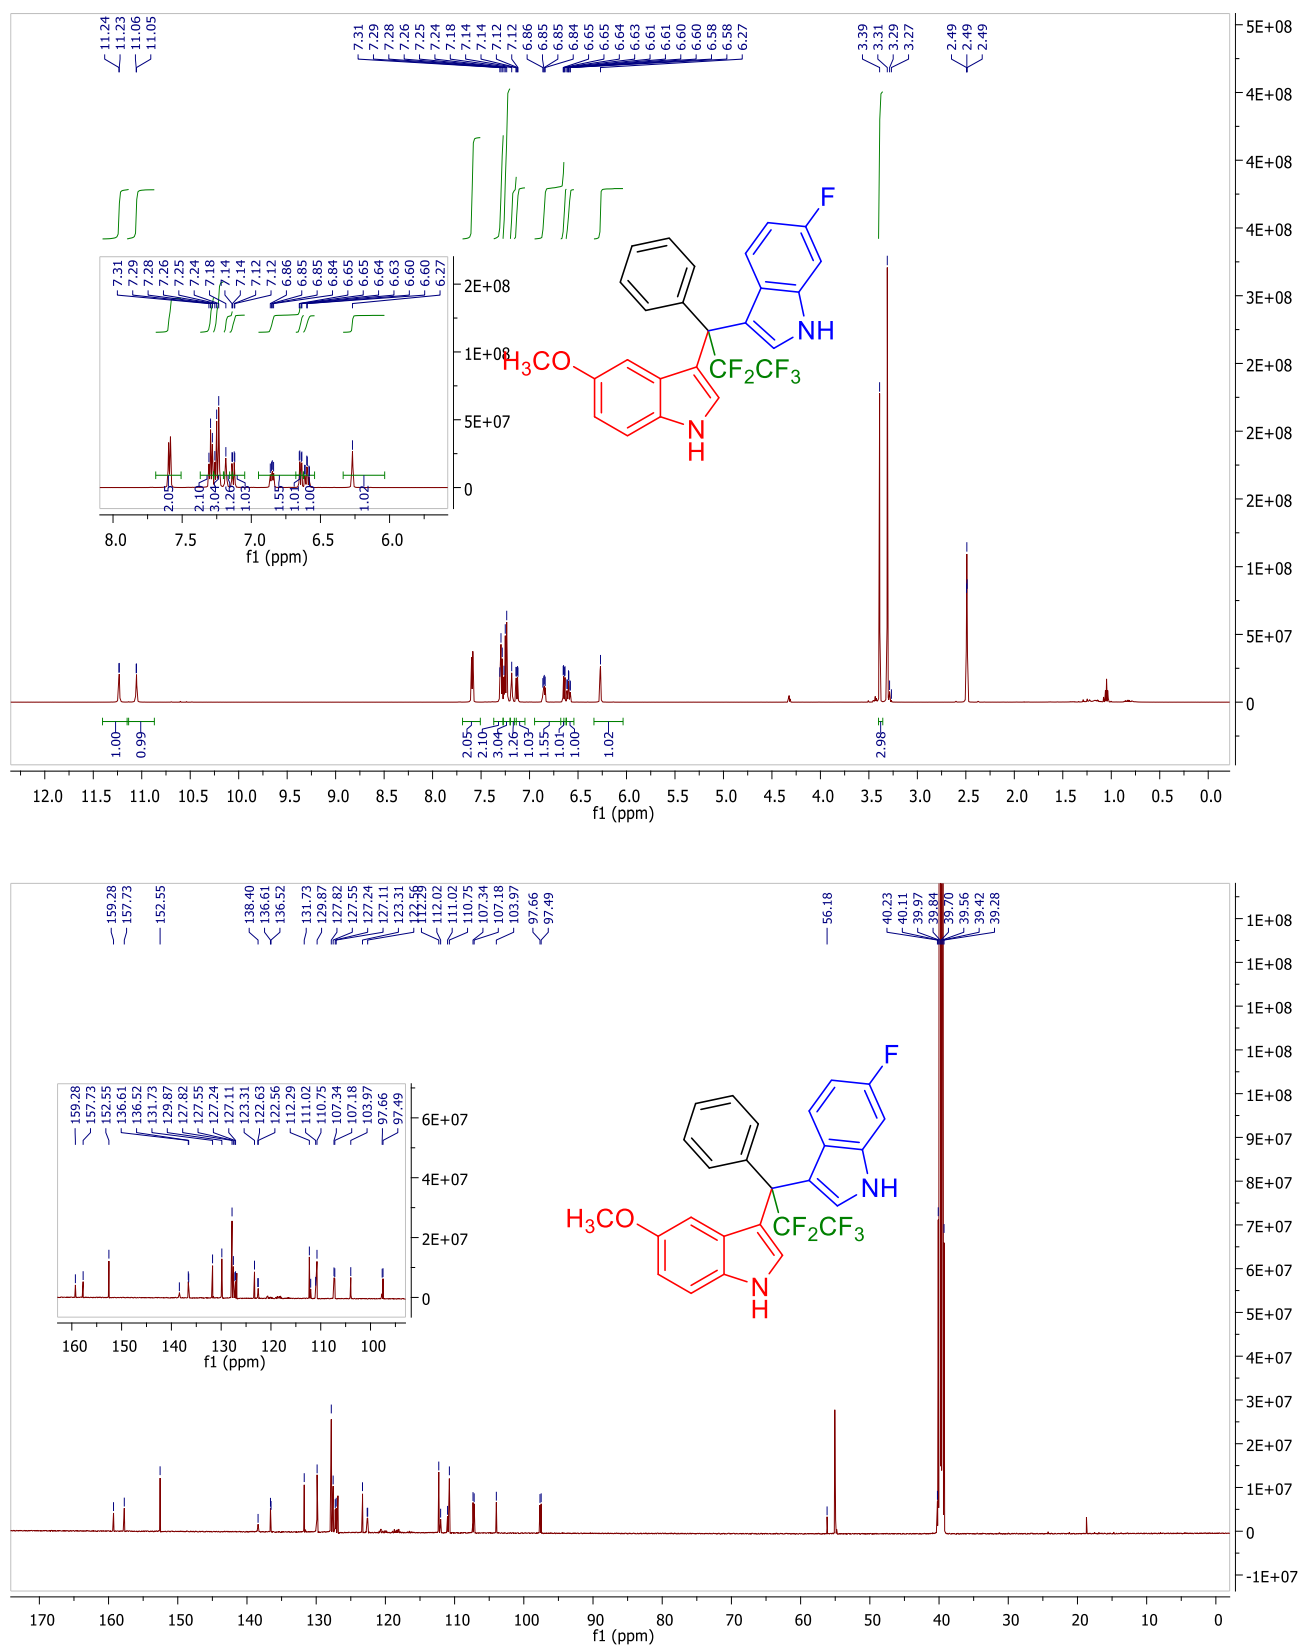

**Figure S30.** <sup>1</sup>H (600 MHz) and <sup>13</sup>C (151 MHz) Spectra of 6-fluoro-3-(2,2,3,3,3-pentafluoro-1-(5-methoxy-1*H*-indol-3-yl)-1-phenylpropyl)-1*H*-indole (**3aa**)

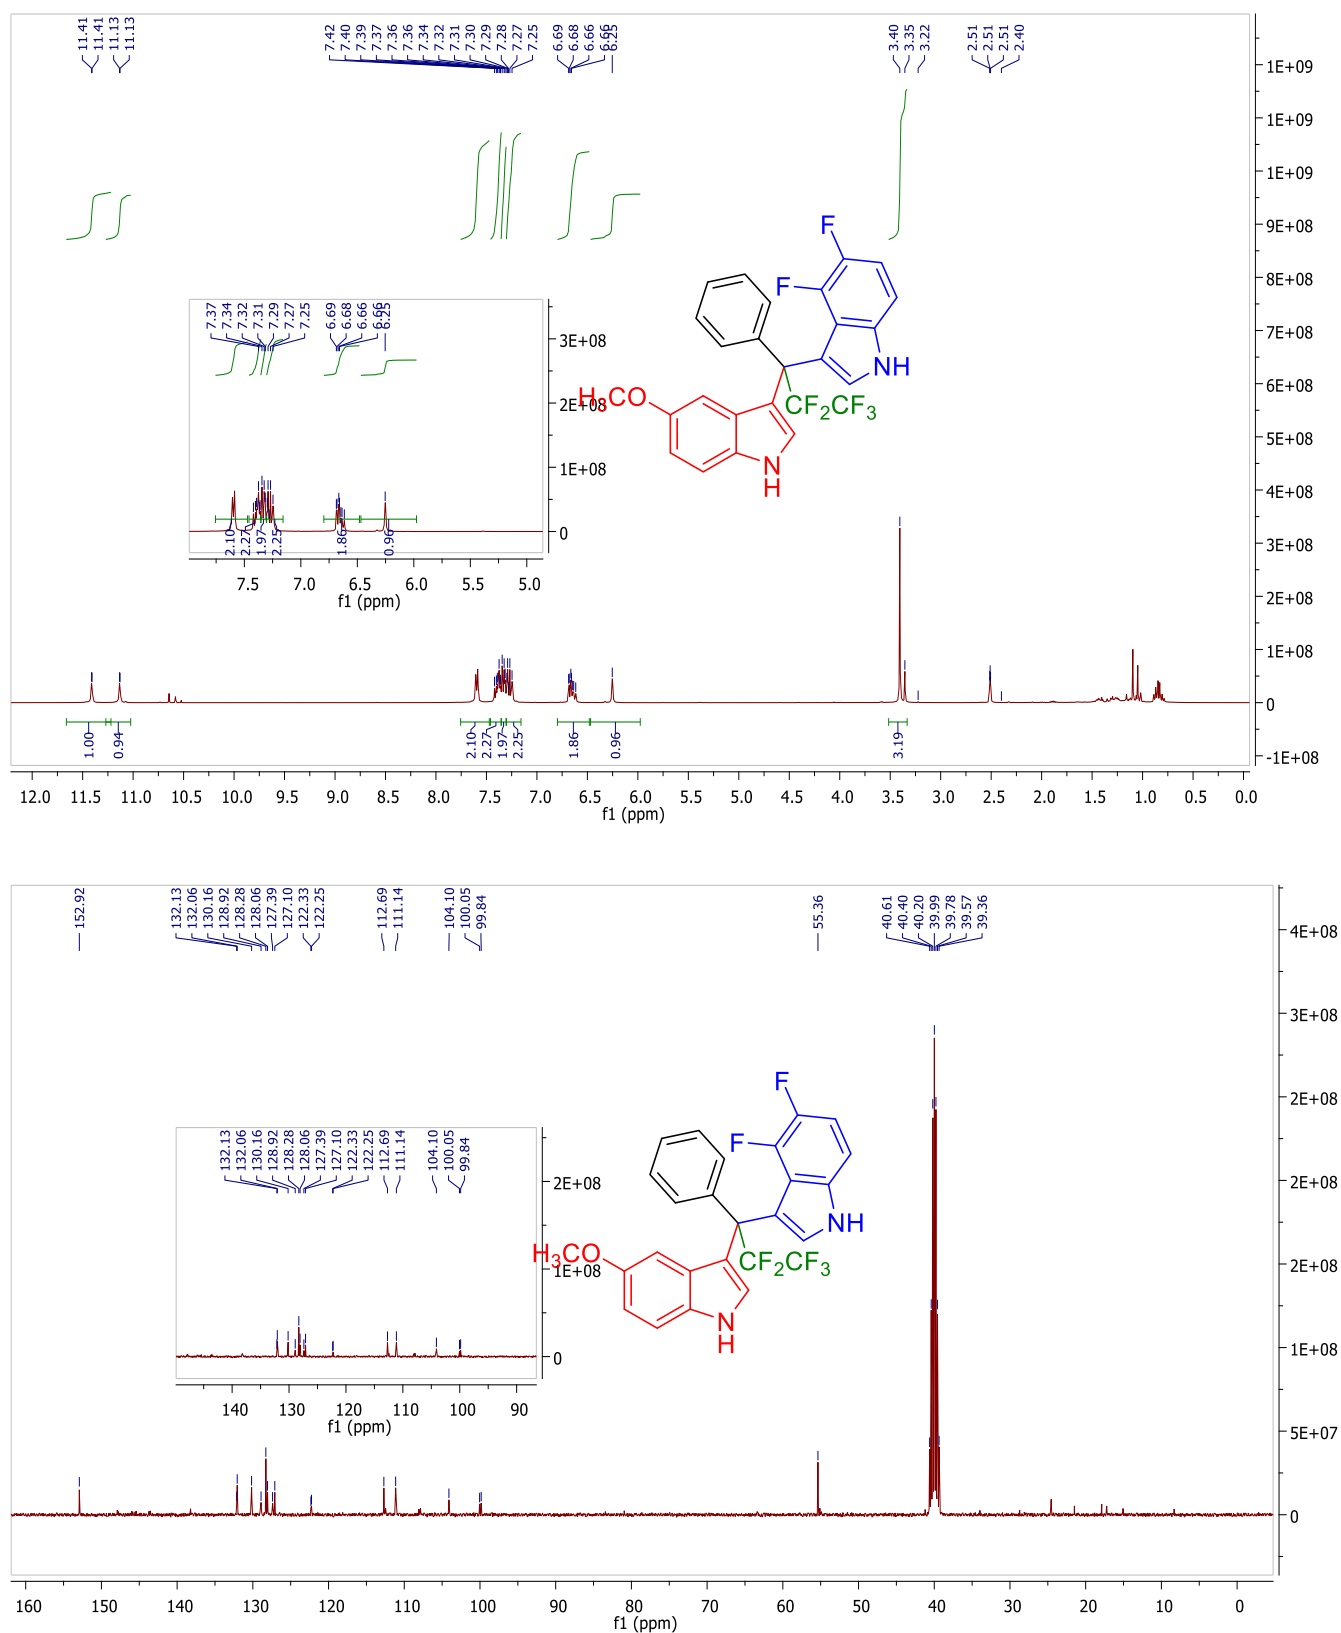

**Figure S31.** <sup>1</sup>H (600 MHz) and <sup>13</sup>C (151 MHz) Spectra of 4,5-difluoro-3-(2,2,3,3,3-pentafluoro-1-(5-methoxy-1*H*-indol-3-yl)-1-phenylpropyl)-1*H*-indole (**3ab**)

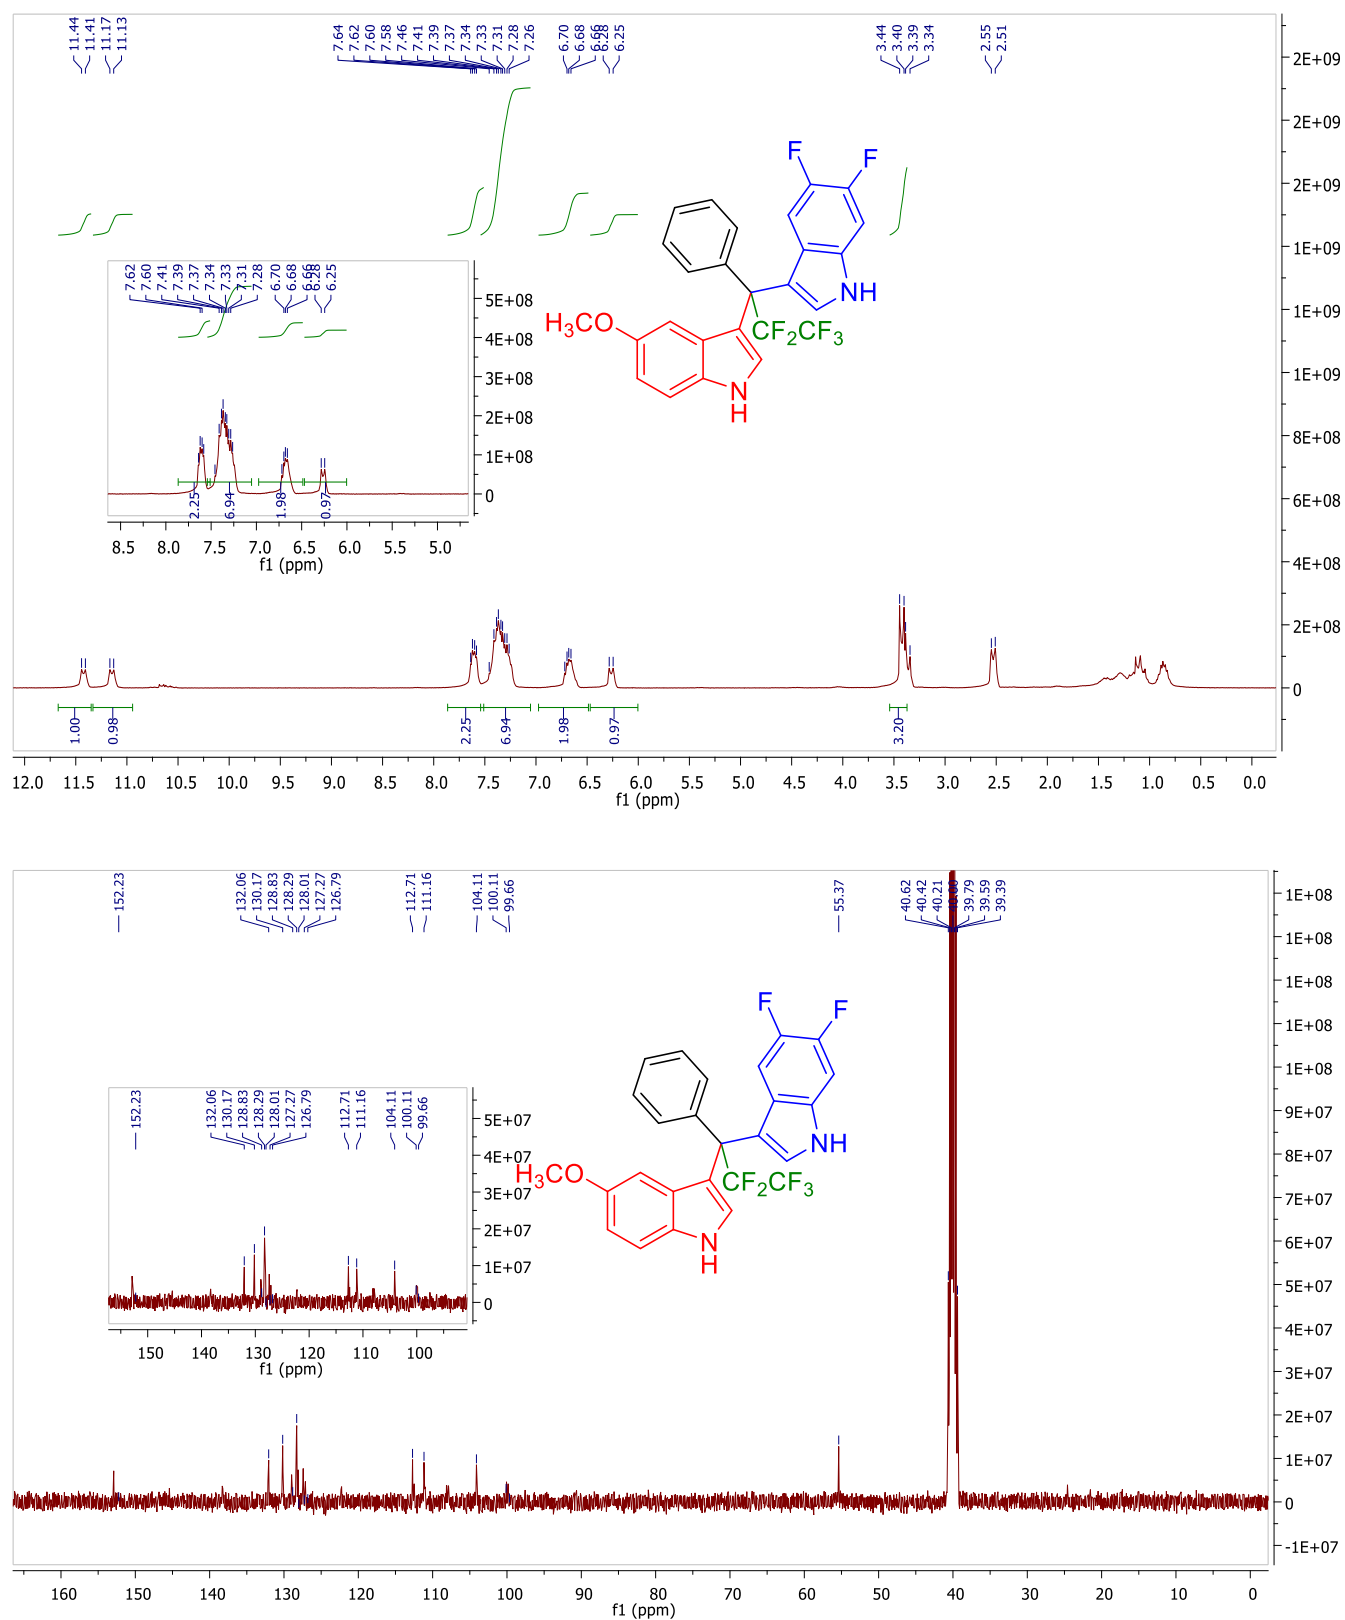

**Figure S32.** <sup>1</sup>H (600 MHz) and <sup>13</sup>C (151 MHz) Spectra of 5,6-difluoro-3-(2,2,3,3,3-pentafluoro-1-(5-methoxy-1*H*-indol-3-yl)-1-phenylpropyl)-1*H*-indole (**3ac**)

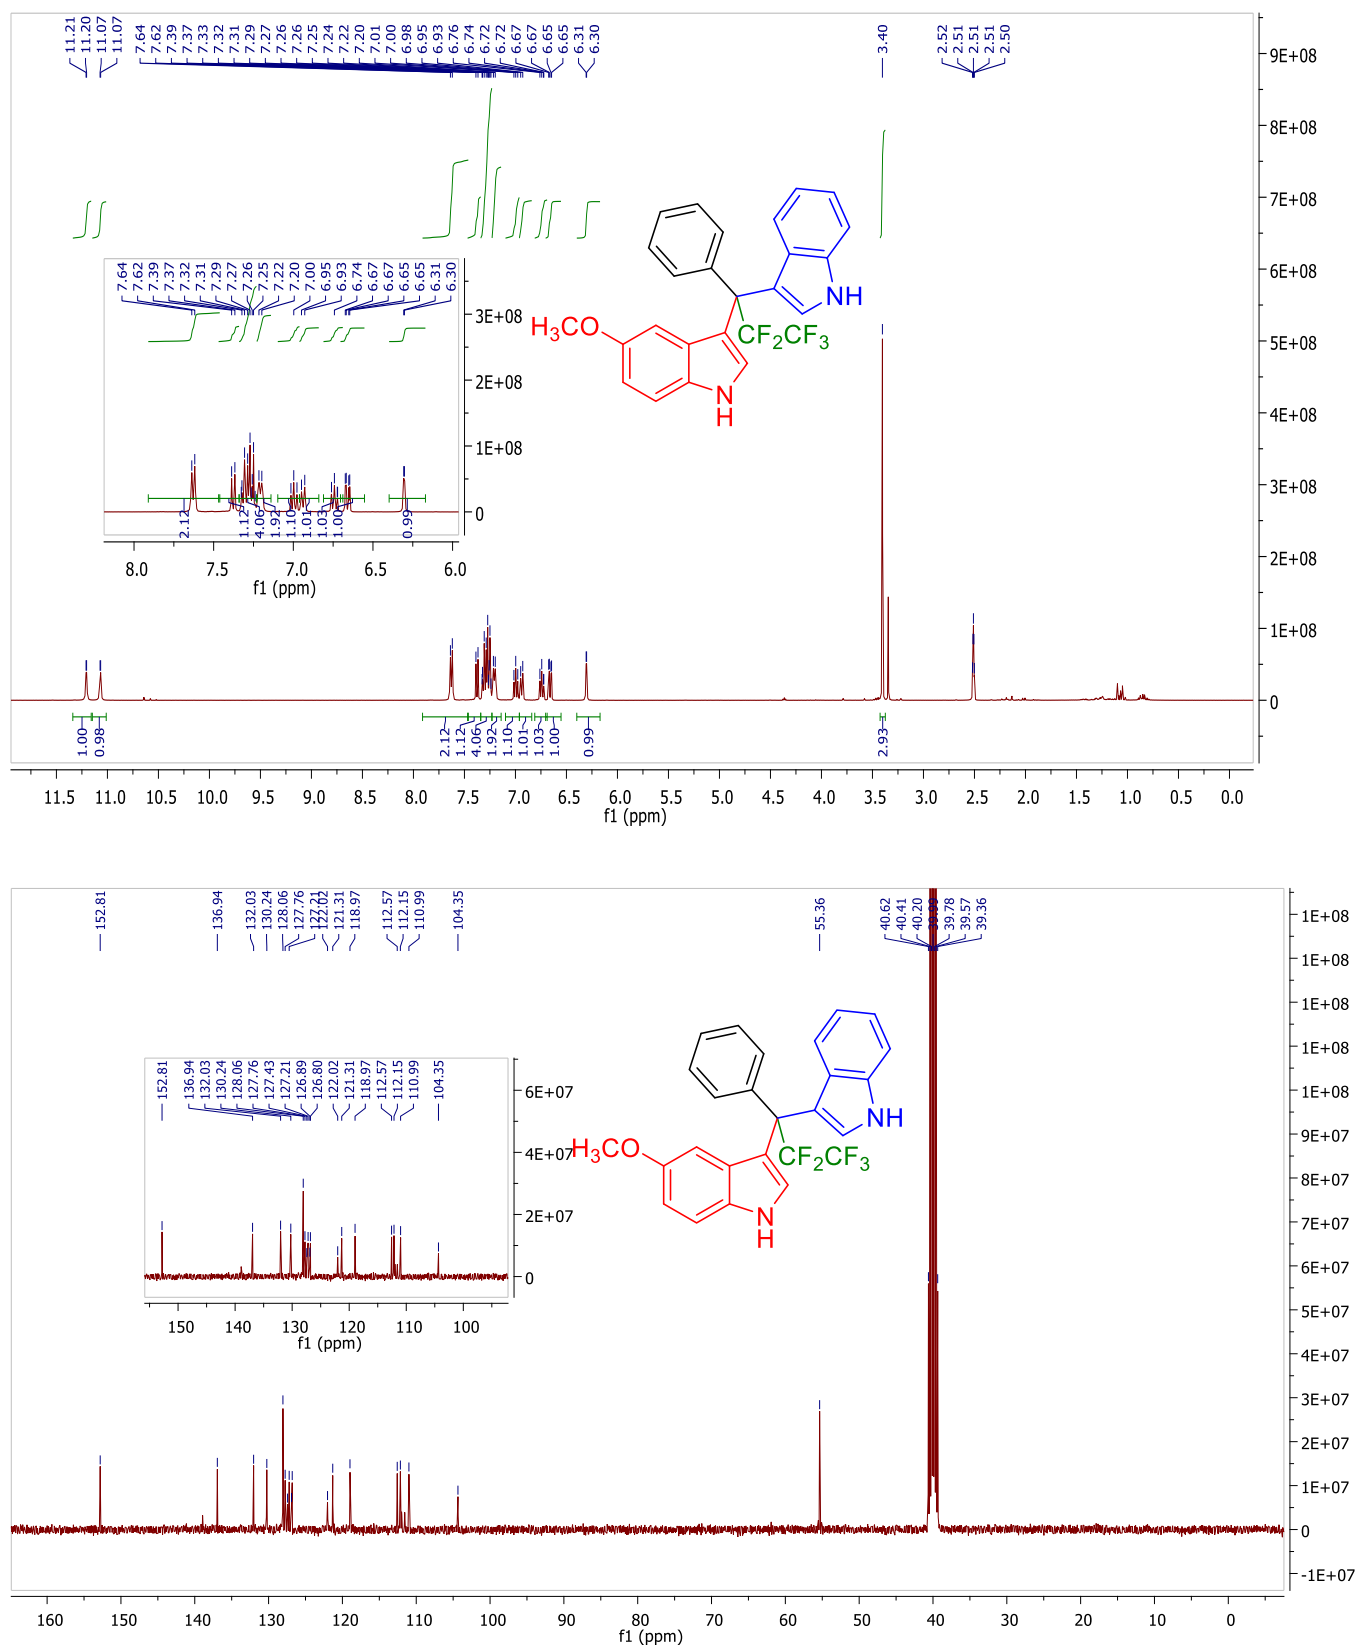

**Figure S33.** <sup>1</sup>H (400 MHz) and <sup>13</sup>C (151 MHz) Spectra of 5-methoxy-3-(2,2,3,3,3-pentafluoro-1-(1*H*-indol-3-yl)-1-phenylpropyl)-1*H*-indole (3ad)

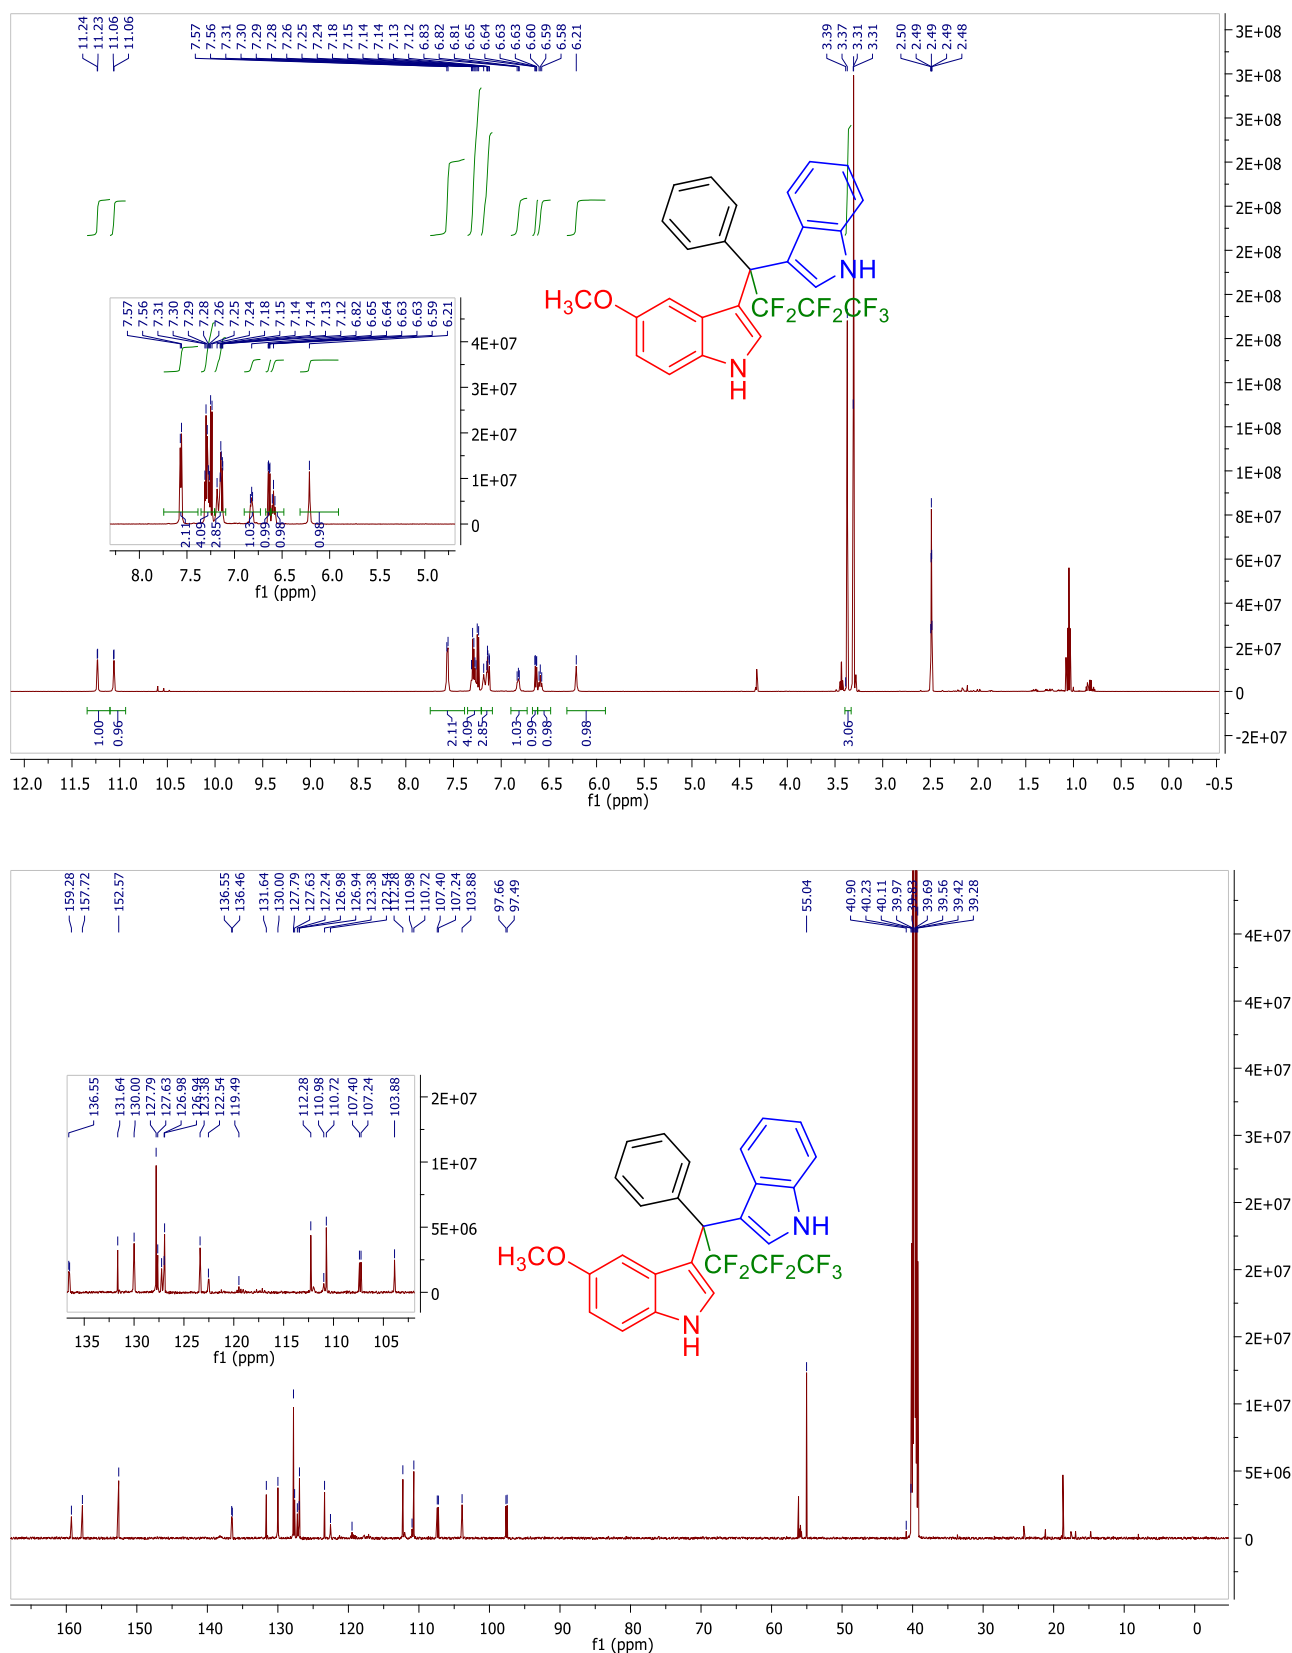

**Figure S34.** <sup>1</sup>H (600 MHz) and <sup>13</sup>C (151 MHz) Spectra of 3-(2,2,3,3,4,4,4-heptafluoro-1-(1*H*-indol-3-yl)-1-phenylbutyl)-5-methoxy-1*H*-indole (**3ae**)

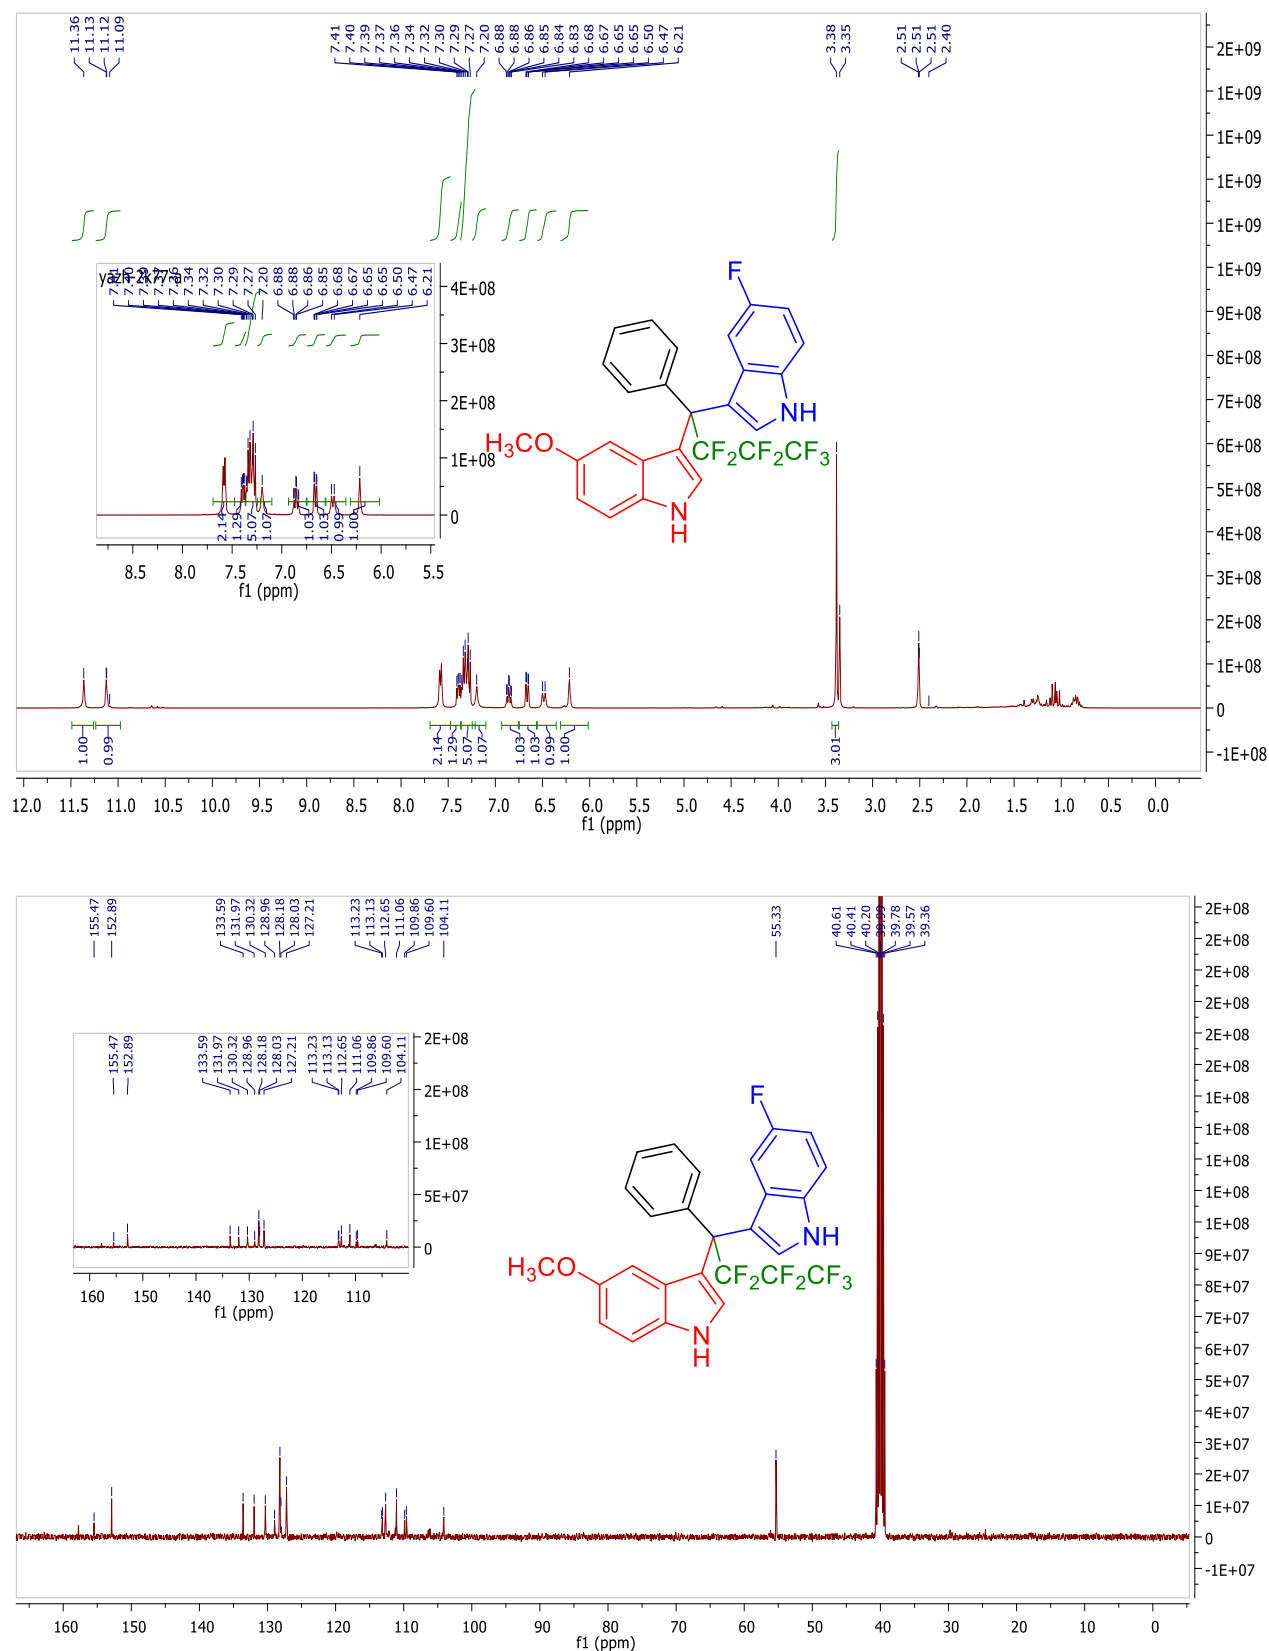

**Figure S35.** <sup>1</sup>H (400 MHz) and <sup>13</sup>C (151 MHz) Spectra of 5-fluoro-3-(2,2,3,3,4,4,4-heptafluoro-1-(5-methoxy-1*H*-indol-3-yl)-1-phenylbutyl)-1*H*-indole (**3af**)

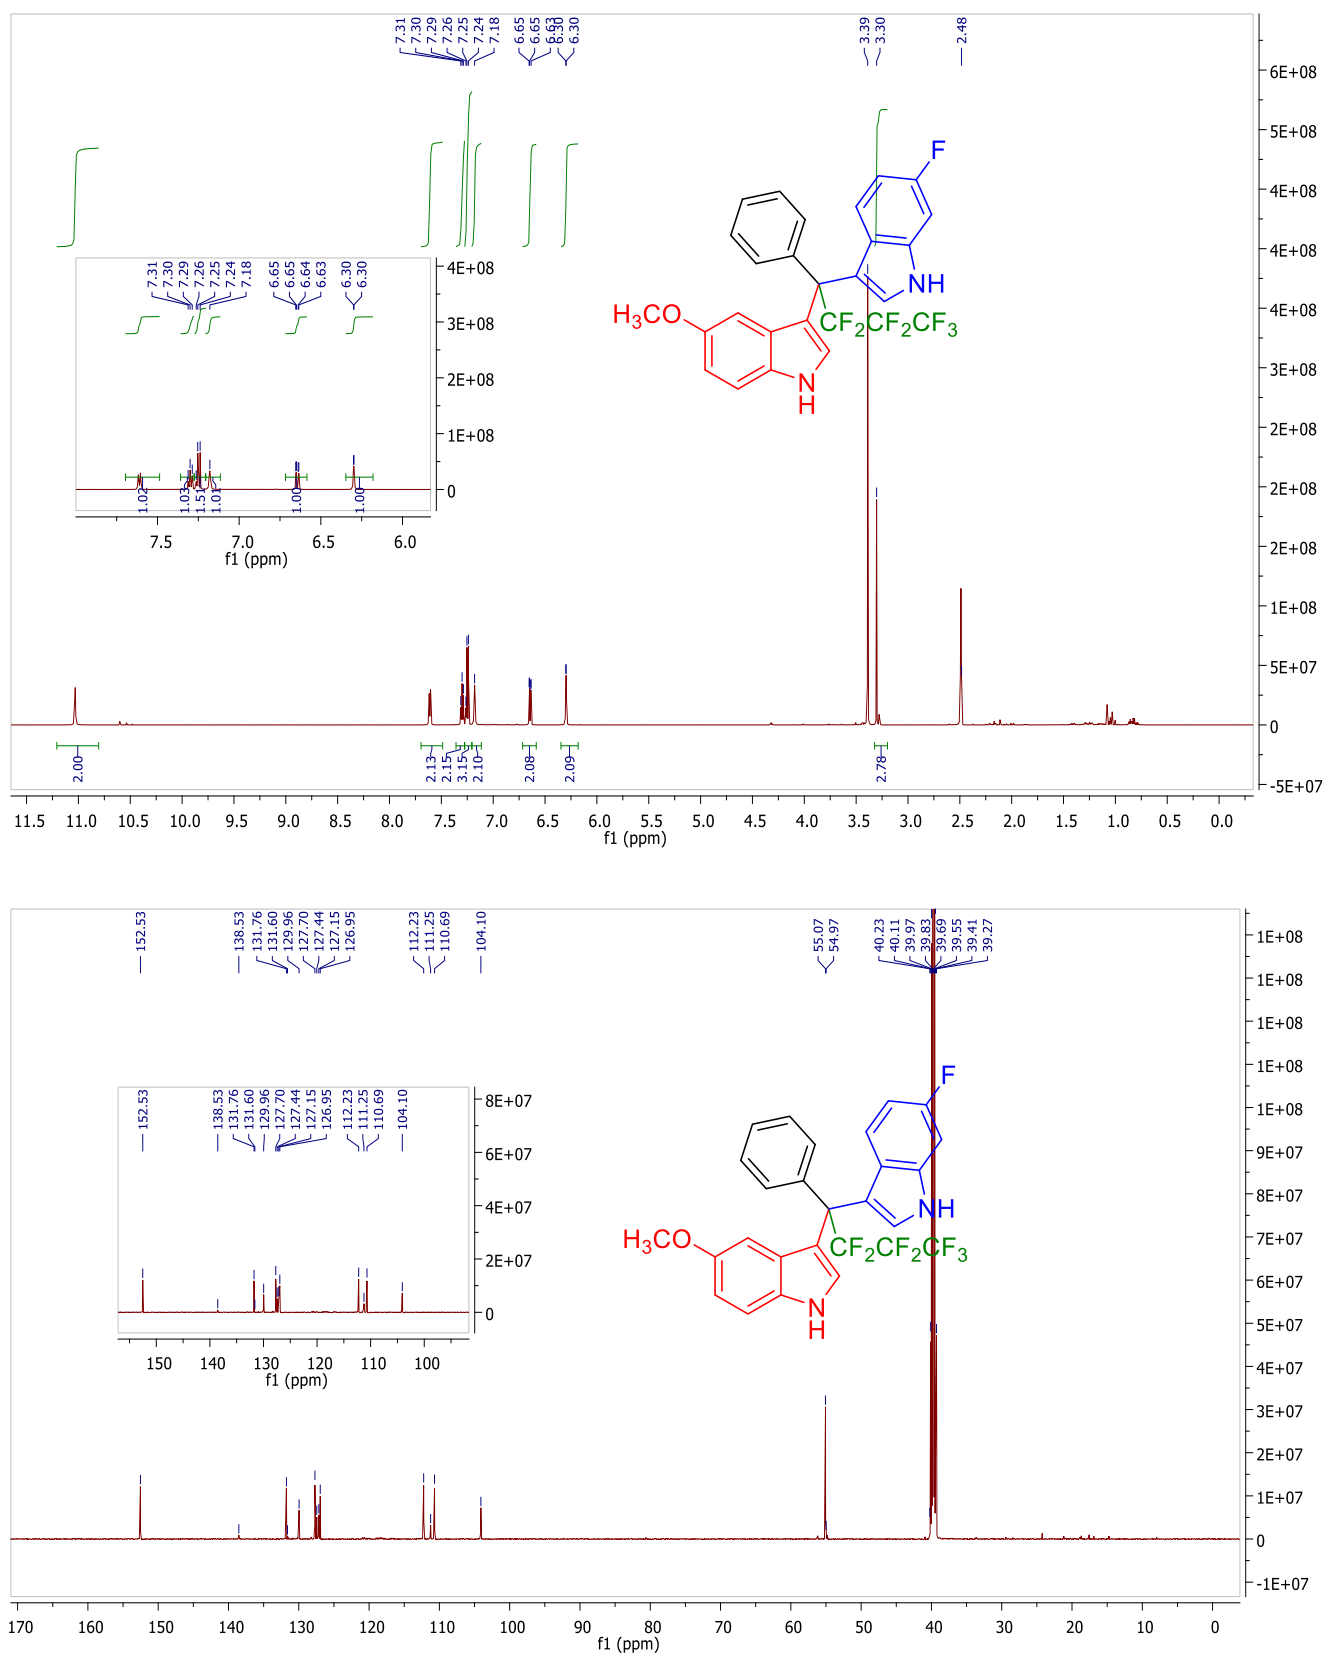

**Figure S36.** <sup>1</sup>H (600 MHz) and <sup>13</sup>C (151 MHz) Spectra of 6-fluoro-3-(2,2,3,3,4,4,4-heptafluoro-1-(5-methoxy-1*H*-indol-3-yl)-1-phenylbutyl)-1*H*-indole (**3ag**)



## References

- S1. Schoeder, C. T.; Mahardhika, A. B.; Drabczyńska, A.; Kieć-Kononowicz, K.; Müller, C. E. *ACS Med. Chem. Lett.* **2020**, 11, 2024-2031.
- S2. Olsen, R. H. J.; DiBerto, J. F.; English, J. G.; Glaudin, A. M.; Krumm, B. E.; Slocum, S. T.; Che, T.; Gavin, A. C.; McCorvy, J. D.; Roth, B. L.; Strachan, R. T. *Nat. Chem. Biol.* **2020**, 16, 841-849.
- S3. Hinz, S.; Navarro, G.; Borroto-Escuela, D.; Seibt, B. F.; Ammon, Y. C.; de Filippo, E.; Danish, A.; Lacher, S. K.; Červinková, B.; Rafehi, M.; Fuxe, K.; Schiedel, A. C.; Franco, R.; Müller, C. E. *Oncotarget*, **2018**, 9, 13593-13611.
- S4. Pillaiyar, T.; Sedaghati, M.; Schnakenburg, G. *Beilstein J. Org. Chem.* **2020**, 16, 778-790.
